# Supplementary material for: Simultaneous Transcriptional Profiling of Bacteria and Their Host Cells
Source: PubMed Central journal article supplement (PMC3851178; doi:10.1371/journal.pone.0080597), 2013-12-04

a.

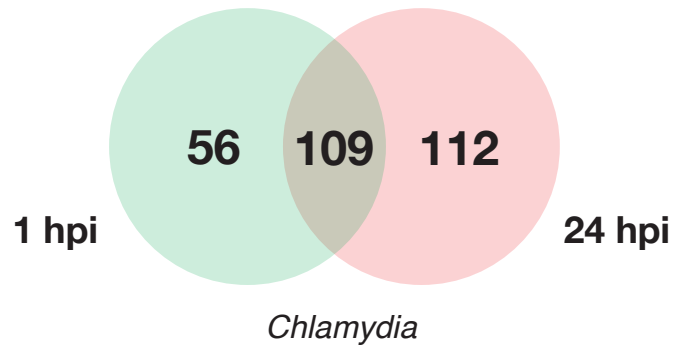

b.

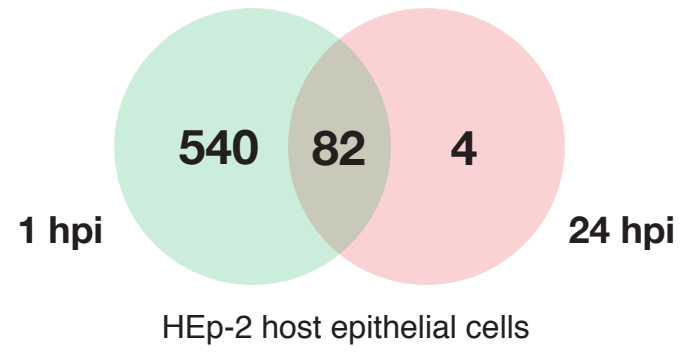

Supplement: pone.0080597.s001.pdf [file pone.0080597.s001.pdf]
