# Supplementary material for: Simultaneous Transcriptional Profiling of Bacteria and Their Host Cells
Source: PubMed Central journal article supplement (PMC3851178; doi:10.1371/journal.pone.0080597), 2013-12-04
Supplement: pone.0080597.s005.pdf [file pone.0080597.s005.pdf]

**Table S1.** RPKM metrics for *Chlamydia* and host cell expression at 1 and 24 hpi

|                                         | <b>mean</b> | <b>SD</b> | <b>median</b> |
|-----------------------------------------|-------------|-----------|---------------|
| <b><i>Chlamydia</i></b>                 |             |           |               |
| <b>1 hpi</b>                            | 1.998       | 12.515    | 0.226         |
| <b>24 hpi</b>                           | 1.881       | 12.441    | 0.411         |
| <b>Human</b>                            |             |           |               |
| <b>1 hpi <i>Chlamydia</i>-infected</b>  | 21.564      | 1213.702  | 0.297         |
| <b>1 hpi mock-infected</b>              | 26.490      | 1260.899  | 0.236         |
| <b>24 hpi <i>Chlamydia</i>-infected</b> | 37.416      | 2420.190  | 0.335         |
| <b>24 hpi mock-infected</b>             | 24.020      | 840.446   | 0.455         |
