# Supplementary material for: Simultaneous Transcriptional Profiling of Bacteria and Their Host Cells
Source: PubMed Central journal article supplement (PMC3851178; doi:10.1371/journal.pone.0080597), 2013-12-04
Supplement: pone.0080597.s006.pdf [file pone.0080597.s006.pdf]

**Table S2** (a) Chlamydial genes at 1 hpi above 0.1 RPKM & 10 mapped reads, ordered by RPKM. (b) Chlamydial genes at 1 hpi above 1 RPKM & 50 mapped reads, ordered by RPKM. (c) Highly expressed chlamydial genes found only at 1 hpi, ordered by RPKM. (d) Chlamydial genes at 24 hpi above 0.1 RPKM & 10 mapped reads, ordered by RPKM. (e) Chlamydial genes at 24 hpi above 1 RPKM & 50 mapped reads, ordered by RPKM. (f) Highly expressed chlamydial genes found at both 1 hpi and 24 hpi, ordered by RPKM. (g) Highly expressed chlamydial genes found only at 24 hpi, ordered by RPKM. Temporal gene expression is noted, if known, from Belland et al (2003) and Nicholson et al (2003).

| Gene ID | Gene Symbol | Read Count | RPKM       | Gene Name                                                | Belland Classifier | Nicholson Classifier |
|---------|-------------|------------|------------|----------------------------------------------------------|--------------------|----------------------|
| CT444   | omcA        | 2306       | 87.7747516 | 9kDa-cysteine-rich lipoprotein                           | Late               | Late                 |
| CT229   |             | 2383       | 38.4263261 | hypothetical protein                                     | Early              |                      |
| CT081   |             | 1177       | 37.4773225 | hypothetical protein                                     |                    | Very late            |
| CT603   | ahpC        | 1599       | 28.5122655 | thioredoxin peroxidase                                   |                    |                      |
| CT065   |             | 3849       | 26.89672   | ADP/ATP translocase                                      | Early              |                      |
| CT734   |             | 1484       | 22.1086671 | hypothetical protein                                     | Early              | Midlate              |
| CT617   | rpsT        | 624        | 22.0062654 | 30S ribosomal protein S20                                |                    |                      |
| CT786   | rpmJ        | 284        | 21.9935572 | 50S ribosomal protein L36                                |                    |                      |
| CT446   | euo         | 1006       | 19.5368495 | hypothetical protein                                     | Early              |                      |
| CT117   |             | 560        | 17.595967  | inclusion membrane protein F                             | Early              |                      |
| CT116   |             | 661        | 17.4526724 | inclusion membrane protein E                             | Early              |                      |
| CT134   |             | 702        | 17.3484556 | hypothetical protein                                     |                    |                      |
| CT228   |             | 908        | 17.0485483 | hypothetical protein                                     | Early              |                      |
| CT785   | rpmH        | 173        | 14.5362477 | 50S ribosomal protein L34                                |                    |                      |
| CT843   | rpsO        | 345        | 14.4435029 | 30S ribosomal protein S15                                |                    |                      |
| CT794.1 |             | 374        | 13.5264828 | hypothetical protein                                     |                    |                      |
| CT500   | ndk         | 569        | 13.3095475 | nucleoside diphosphate kinase                            |                    | Midlate              |
| CT018   |             | 508        | 13.060744  | hypothetical protein                                     |                    |                      |
| CT508   | rs11        | 463        | 12.6846902 | 30S ribosomal protein S11                                |                    |                      |
| CT602   |             | 458        | 12.0117368 | hypothetical protein                                     |                    |                      |
| CT787   | rpsN        | 291        | 11.3135052 | 30S ribosomal protein S14                                |                    |                      |
| CT524   | rpsS        | 249        | 11.0926694 | 30S ribosomal protein S19                                |                    |                      |
| CT802   | rpsR        | 255        | 10.6373142 | 30S ribosomal protein S18                                |                    |                      |
| CT801   | rpsF        | 320        | 10.614898  | 30S ribosomal protein S6                                 |                    |                      |
| CT080   | ltuB        | 281        | 10.511727  | late transcription unit B protein                        | Late               | Late                 |
| CT316   | rplL        | 339        | 10.494848  | 50S ribosomal protein L7/L12                             |                    |                      |
| CT135   |             | 1002       | 10.1194002 | hypothetical protein                                     |                    |                      |
| CT022   | rpmE2       | 327        | 9.9843869  | 50S ribosomal protein L31 type B                         |                    |                      |
| CT342   | rpsU        | 142        | 9.8207615  | 30S ribosomal protein S21                                |                    |                      |
| CT509   | rpsM        | 319        | 9.3592016  | 30S ribosomal protein S13                                |                    |                      |
| CT439m  | rpsL        | 303        | 8.9849504  | 30S ribosomal protein S12                                |                    |                      |
| CT795   |             | 383        | 8.8247604  | hypothetical protein                                     | Early              |                      |
| CT525   | rplB        | 735        | 8.7146543  | 50S ribosomal protein L2                                 |                    |                      |
| CT526   | rplW        | 246        | 8.4948625  | 50S ribosomal protein L23                                |                    |                      |
| CT834   | rplM        | 140        | 8.2391597  | 50S ribosomal protein L35                                |                    |                      |
| CT569   |             | 270        | 8.1425376  | general secretion pathway protein G                      |                    |                      |
| CT784   | rnpA        | 254        | 7.9963338  | ribonuclease P                                           |                    |                      |
| CT115   |             | 330        | 7.9944854  | inclusion membrane protein D                             | Early              |                      |
| CT319   | rplK        | 300        | 7.7923786  | 50S ribosomal protein L11                                |                    |                      |
| CT421.1 |             | 101        | 7.7402745  | hypothetical protein                                     |                    |                      |
| CT317   | rplJ        | 374        | 7.6551861  | 50S ribosomal protein L10                                |                    |                      |
| CT523   | rplV        | 188        | 7.4062165  | 50S ribosomal protein L22                                |                    |                      |
| CT265   | accA        | 642        | 7.2790527  | acetyl-CoA carboxylase carboxyltransferase subunit alpha |                    |                      |
| CT810   | rpmF        | 114        | 7.1804193  | 50S ribosomal protein L32                                |                    |                      |

|         |      |      |           |                                                      |       |           |
|---------|------|------|-----------|------------------------------------------------------|-------|-----------|
| CT398.1 |      | 896  | 7.1613702 | Ribonuclease P RNA                                   |       |           |
| CT421.2 |      | 99   | 7.0918647 | hypothetical protein                                 |       |           |
| CT438   | rs7  | 291  | 6.9443567 | 30S ribosomal protein S7                             |       |           |
| CT568   |      | 311  | 6.9425411 | hypothetical protein                                 |       |           |
| CT659   |      | 152  | 6.8134292 | hypothetical protein                                 | Late  | Late      |
| CT150   | rpmG | 85   | 6.7045597 | 50S ribosomal protein L33                            |       |           |
| CT318   | rplA | 397  | 6.6948475 | 50S ribosomal protein L1                             |       |           |
| CT518   | rplN | 210  | 6.3617879 | 50S ribosomal protein L14                            |       |           |
| CT443   | omcB | 1039 | 6.1710133 | 60kD cysteine-rich outer membrane protein            | Late  | Late      |
| CT322   | tuf  | 670  | 6.1607117 | elongation factor Tu                                 |       |           |
| CT026   | rpsP | 178  | 6.0953965 | 30S ribosomal protein S16                            |       |           |
| CT125   | rplM | 256  | 6.0072041 | 50S ribosomal protein L13                            |       |           |
| CT402   | lpxK | 698  | 5.9644665 | tetraacyldisaccharide 4'-kinase                      |       |           |
| CT513   | rplR | 193  | 5.9340593 | 50S ribosomal protein L18                            |       |           |
| CT618   |      | 415  | 5.881029  | hypothetical protein                                 |       | Midlate   |
| CT803   | rplI | 277  | 5.84832   | 50S ribosomal protein L9                             |       |           |
| CT519   | rpsQ | 135  | 5.6762988 | 30S ribosomal protein S17                            |       |           |
| CT506   | rplQ | 221  | 5.6699312 | 50S ribosomal protein L17                            |       |           |
| CT528   | rplC | 308  | 5.6467981 | 50S ribosomal protein L3                             |       |           |
| CT507   | rpoA | 625  | 5.6401849 | DNA-directed RNA polymerase subunit alpha            |       |           |
| CT517   | rplX | 153  | 5.6058867 | 50S ribosomal protein L24                            |       |           |
| CT098   | rpsA | 882  | 5.5326116 | 30S ribosomal protein S1                             |       |           |
| CT409   |      | 710  | 5.5246412 | amino acid permease                                  |       |           |
| CT647   |      | 303  | 5.4690497 | hypothetical protein                                 |       |           |
| CT147   |      | 2156 | 5.4657397 | hypothetical protein                                 | Early | Very late |
| CT691   |      | 346  | 5.33416   | hypothetical protein                                 |       |           |
| CT565   |      | 212  | 5.2395889 | hypothetical protein                                 | Late  | Late      |
| CT799   | ctc  | 288  | 5.1598131 | 50S ribosomal protein L25/general stress protein Ctc |       |           |
| CT835   | rplT | 163  | 5.0284141 | 50S ribosomal protein L20                            |       |           |
| CT512   | rpsE | 213  | 4.9882387 | 30S ribosomal protein S5                             |       |           |
| CT126   | rpsI | 149  | 4.9733706 | 30S ribosomal protein S9                             |       |           |
| CT420   | rplU | 156  | 4.862071  | 50S ribosomal protein L21                            |       |           |
| CT833   | infC | 223  | 4.8054049 | translation initiation factor IF-3                   |       |           |
| CT326.2 |      | 79   | 4.762166  | hypothetical protein                                 |       |           |
| CT567   |      | 239  | 4.7369079 | hypothetical protein                                 |       |           |
| CT086   | rpmB | 113  | 4.6541717 | 50S ribosomal protein L28                            |       |           |
| CT398   |      | 334  | 4.6252794 | hypothetical protein                                 |       |           |
| CT522   | rpsC | 277  | 4.5980187 | 30S ribosomal protein S3                             |       |           |
| CT221   | yqfU | 387  | 4.5267681 | hypothetical protein                                 |       |           |
| CT511   | rplO | 188  | 4.5056723 | 50S ribosomal protein L15                            |       |           |
| CT118   |      | 242  | 4.3247408 | inclusion membrane protein G                         | Early |           |
| CT514   | rplF | 223  | 4.3073965 | 50S ribosomal protein L6                             |       |           |
| CT648   |      | 493  | 4.19834   | hypothetical protein                                 |       |           |
| CT516   | rplE | 189  | 4.1667211 | 50S ribosomal protein L5                             |       |           |
| CT436   | rpsJ | 110  | 4.1026185 | 30S ribosomal protein S10                            |       |           |
| CT249   |      | 128  | 4.0990471 | hypothetical protein                                 |       | Very late |
| CT573   |      | 467  | 4.0737107 | hypothetical protein                                 |       |           |
| CT527   | rplD | 274  | 4.0619628 | 50S ribosomal protein L4                             |       |           |
| CT437   | fusA | 777  | 4.0478134 | elongation factor G                                  |       |           |
| CT572   | gspD | 844  | 4.0006388 | general secretion pathway protein D                  |       |           |
| CT626   | rpsD | 230  | 3.9992337 | 30S ribosomal protein S4                             |       |           |
| CT520   | rpmC | 83   | 3.9330767 | 50S ribosomal protein L29                            |       |           |

|       |        |      |           |                                                              |       |          |
|-------|--------|------|-----------|--------------------------------------------------------------|-------|----------|
| CT377 | ltuA   | 76   | 3.9194882 | late transcription unit A protein                            |       | Midlate  |
| CT571 | gspE   | 558  | 3.9171093 | general secretion pathway protein E                          |       |          |
| CT832 | nusB   | 180  | 3.8710798 | transcription antitermination protein NusB                   |       |          |
| CT515 | rpsH   | 154  | 3.8421699 | 30S ribosomal protein S8                                     |       |          |
| CT341 | dnaJ   | 379  | 3.7427793 | chaperone protein DnaJ                                       |       |          |
| CT343 |        | 192  | 3.3995728 | O-sialoglycoprotein endopeptidase family protein             |       |          |
| CT735 | dagA_2 | 444  | 3.1230752 | Na( )-linked D-alanine glycine permease                      | Early |          |
| CT111 | groES  | 91   | 3.082376  | co-chaperonin GroES                                          | Early |          |
| CT419 | rpmA   | 66   | 3.0421696 | 50S ribosomal protein L27                                    |       |          |
| CT095 | rbfA   | 113  | 3.0155688 | ribosome-binding factor A                                    |       |          |
|       |        |      |           | tRNA uridine 5-carboxymethylaminomethyl modification enzyme  |       |          |
| CT498 | gidA   | 484  | 3.0051616 | GidA                                                         |       |          |
| CT723 | yjbC   | 224  | 2.9879276 | ribosomal large subunit pseudouridine synthase B             |       |          |
| CT028 | rplS   | 109  | 2.9638218 | 50S ribosomal protein L19                                    |       |          |
| CT775 |        | 198  | 2.9076679 | 1-acyl-sn-glycerol-3-phosphate acyltransferase               |       |          |
| CT314 | rpoC   | 1098 | 2.8219162 | DNA-directed RNA polymerase subunit beta'                    |       |          |
| CT521 | rplP   | 131  | 2.7961337 | 50S ribosomal protein L16                                    |       |          |
| CT169 | trpR   | 82   | 2.7728044 | Trp operon repressor                                         |       |          |
| CT867 |        | 254  | 2.7474293 | hypothetical protein                                         | Late  |          |
| CT570 | gspF   | 283  | 2.7060197 | general secretion pathway protein F                          |       |          |
| CT327 | trpC   | 150  | 2.7059324 | N-(5'-phosphoribosyl)anthranilate isomerase                  |       |          |
| CT809 |        | 66   | 2.6971523 | hypothetical protein                                         |       |          |
| CT529 |        | 272  | 2.6939747 | hypothetical protein                                         | Early |          |
| CT566 |        | 263  | 2.6882372 | hypothetical protein                                         |       |          |
| CT110 | groEL  | 384  | 2.6829135 | chaperonin GroEL                                             | Early |          |
| CT096 | infB   | 611  | 2.5912625 | translation initiation factor IF-2                           |       | Midcycle |
| CT097 | nusA   | 270  | 2.4909793 | transcription elongation factor NusA                         |       |          |
| CT315 | rpoB   | 812  | 2.475575  | DNA-directed RNA polymerase subunit beta                     |       |          |
| CT321 | secE   | 59   | 2.4504893 | preprotein translocase subunit SecE                          |       |          |
| CT025 | ffh    | 288  | 2.4388213 | signal recognition particle, subunit FFH/SRP54               |       |          |
| CT510 | secY   | 299  | 2.4092502 | preprotein translocase subunit SecY                          |       |          |
| CT401 | gltT   | 315  | 2.3706737 | glutamate symport                                            |       |          |
| CT842 | pnp    | 442  | 2.3693412 | polynucleotide phosphorylase/polyadenylase                   |       | Midlate  |
| CT285 | lplA_1 | 145  | 2.3525831 | lipoate-protein ligase A                                     |       |          |
| CT136 |        | 160  | 2.304708  | lysophospholipase esterase                                   |       |          |
|       |        |      |           | CDP-diacylglycerol--glycerol-3-phosphate 3-                  |       |          |
| CT496 | pgsA_1 | 112  | 2.2922814 | phosphatidyltransferase                                      |       | Midlate  |
| CT788 |        | 100  | 2.2701766 | leader (60) peptide-periplasmic                              |       |          |
| CT768 |        | 342  | 2.1965764 | hypothetical protein                                         |       | Midlate  |
| CT505 | gapA   | 187  | 2.1909558 | glyceraldehyde-3-phosphate dehydrogenase                     |       | Midlate  |
| CT808 | cafE   | 330  | 2.1492329 | ribonuclease E                                               |       |          |
| CT383 |        | 118  | 2.0917038 | hypothetical protein                                         |       |          |
| CT320 | nusG   | 106  | 2.051111  | transcription antitermination protein NusG                   |       |          |
| CT504 |        | 135  | 1.995123  | hypothetical protein                                         |       | Midlate  |
| CT310 | atpE   | 124  | 1.9894525 | V-type ATP synthase subunit E                                |       |          |
| CT405 | ribC   | 89   | 1.9839052 | riboflavin synthase subunit alpha                            |       |          |
| CT353 | def    | 74   | 1.9784532 | peptide deformylase                                          |       |          |
|       |        |      |           | tRNA (guanine-N(1)-)-methyltransferase/unknown domain fusion |       |          |
| CT027 | trmD   | 197  | 1.9611041 | protein                                                      |       |          |
| CT292 | dut    | 89   | 1.9591035 | deoxyuridine 5'-triphosphate nucleotidohydrolase             |       |          |
| CT046 | hctB   | 113  | 1.9300894 | histone-like protein 2                                       | Late  | Late     |
| CT005 |        | 176  | 1.926978  | hypothetical protein                                         |       | Late     |

|        |           |       |           |                                                                |       |            |
|--------|-----------|-------|-----------|----------------------------------------------------------------|-------|------------|
| CT288  |           | 307   | 1.9231752 | hypothetical protein                                           | Early | Late       |
| CT287  | mnmA      | 201   | 1.9185056 | tRNA-specific 2-thiouridylase MnmA                             |       |            |
| CT182  | kdsB      | 142   | 1.8348909 | 3-deoxy-manno-octulosonate cytidyltransferase                  |       |            |
| CT836  | pheS      | 182   | 1.8241992 | phenylalanyl-tRNA synthetase subunit alpha                     |       |            |
| CT214  |           | 278   | 1.7854991 | hypothetical protein                                           | Late  | Late       |
| CT800  | pth       | 74    | 1.764235  | peptidyl-tRNA hydrolase                                        |       |            |
| CT579  |           | 223   | 1.7564259 | hypothetical protein                                           | Late  | Late       |
| CT495  |           | 249   | 1.7408536 | ADP/ATP translocase                                            | Early |            |
| CT017  |           | 188   | 1.7345002 | hypothetical protein                                           |       | Late       |
| CT554  | brnQ      | 204   | 1.7029149 | branched chain amino acid ABC transporter carrier protein      |       |            |
| CT841  | ftsH      | 450   | 1.6985594 | ATP-dependent zinc protease                                    |       | Late       |
| CT492  | coaE      | 89    | 1.6979562 | dephospho-CoA kinase                                           |       | Midlate II |
|        |           |       |           | bifunctional 3,4-dihydroxy-2-butanone 4-phosphate synthase/GTP |       |            |
| CT731  | ribA/ribB | 202   | 1.6974322 | cyclohydrolase II protein                                      |       |            |
| CT736  | ybcL      | 93    | 1.6969612 | hypothetical protein                                           |       |            |
| CT678  | pyrH      | 109   | 1.6788329 | uridylate kinase                                               |       |            |
| CT029  | rnhB      | 100   | 1.6384954 | ribonuclease HII                                               |       |            |
| CT359  |           | 100   | 1.6359142 | hypothetical protein                                           |       |            |
| CT066  |           | 74    | 1.565509  | hypothetical protein                                           |       | Midlate    |
| CT133  |           | 110   | 1.5653594 | rRNA methylase                                                 | Early |            |
| CT180  | tauB      | 94    | 1.5420385 | nitrate/iron ABC transporter ATPase                            |       |            |
| CT703  | engA      | 197   | 1.4893178 | GTP-binding protein EngA                                       |       |            |
| CT284  |           | 211   | 1.4880551 | phospholipase D                                                |       |            |
| CT348  | yjjK      | 204   | 1.4578815 | ABC transporter ATPase                                         |       |            |
| CT094  | truB      | 98    | 1.4465584 | tRNA pseudouridine synthase B                                  |       |            |
| CT538  |           | 83    | 1.3874105 | hypothetical protein                                           |       |            |
| CT129  | glnP      | 95    | 1.3764455 | amino acid ABC transporter ATPase                              |       |            |
| CT875  |           | 154   | 1.3742533 | hypothetical protein                                           |       | Late       |
| CT776  | aas       | 213   | 1.3444105 | long chain fatty acid--[acyl-carrier-protein] ligase           |       | Late       |
| CT035  |           | 94    | 1.3245183 | biotin protein ligase                                          | Early | Very late  |
| CT217  | ydaO      | 70    | 1.3228236 | PP-loop superfamily ATPase                                     |       |            |
| CT601  | papQ      | 71    | 1.3158358 | invasin repeat-containing phosphatase                          |       |            |
| CT364  | dapB      | 83    | 1.3137126 | dihydrodipicolinate reductase                                  |       |            |
| CT811  | plsX      | 98    | 1.2130594 | putative glycerol-3-phosphate acyltransferase PlsX             |       |            |
| CT429  |           | 112   | 1.2109531 | hypothetical protein                                           |       |            |
| CT313  | tal       | 123   | 1.2007853 | transaldolase B                                                |       | Midlate    |
| CT264  | msbA      | 229   | 1.1727573 | transport ATP binding protein                                  |       |            |
| CT543  | hisS      | 109   | 1.1594402 | histidyl-tRNA synthetase                                       |       |            |
| CT034  | ytfF      | 110   | 1.1488303 | cationic amino acid transporter                                |       |            |
| CT820  | ftsY      | 90    | 1.1437511 | cell division protein FtsY                                     |       |            |
| CT397  | vacB      | 199   | 1.1199961 | exoribonuclease II                                             |       |            |
| CT445  | gltX      | 138   | 1.1180688 | glutamyl-tRNA synthetase                                       |       |            |
| CT410  | pcnB_1    | 119   | 1.107962  | polyA polymerase                                               |       |            |
| CT183  | pyrG      | 147   | 1.0955577 | CTP synthetase                                                 |       |            |
| CT613  | folP      | 116   | 1.093358  | dihydropteroate synthase                                       |       |            |
| CT422  |           | 56    | 1.0884551 | metalloenzyme                                                  |       |            |
| CT857  |           | 129   | 1.0657594 | Na /H antiporter                                               |       |            |
| CT293  | accD      | 104   | 1.0473762 | acetyl-CoA carboxylase subunit beta                            |       |            |
| CT515  | rpsH      | 5266  | 1.1688084 | 30S ribosomal protein S8                                       |       |            |
| CT514  | rplF      | 7425  | 1.1655267 | 50S ribosomal protein L6                                       |       |            |
| CT351a | secG      | 4203  | 1.1609324 | preprotein translocase subunit SecG                            |       |            |
| CT275  | dnaA      | 18449 | 1.1588853 | chromosomal replication initiation protein                     |       |            |

|       |        |       |           |                                                                        |      |            |
|-------|--------|-------|-----------|------------------------------------------------------------------------|------|------------|
| CT858 |        | 25646 | 1.146175  | protease                                                               |      |            |
| CT353 | def    | 7131  | 1.1425044 | peptide deformylase                                                    |      |            |
| CT550 |        | 5688  | 1.1359986 | hypothetical protein                                                   |      | Midlate    |
| CT672 | fliN   | 15008 | 1.1273801 | type III secretion system protein                                      |      | Midlate    |
| CT582 | minD   | 9935  | 1.1060616 | chromosome partitioning ATPase-CHLTR plasmid protein homolog GP5D      |      |            |
| CT522 | rpsC   | 8196  | 1.0991597 | 30S ribosomal protein S3                                               |      |            |
| CT321 | secE   | 3168  | 1.0987296 | preprotein translocase subunit SecE                                    |      |            |
| CT364 | dapB   | 9725  | 1.0956429 | dihydrodipicolinate reductase                                          |      |            |
| CT670 |        | 6527  | 1.0825593 | hypothetical protein                                                   |      | Midlate    |
| CT031 |        | 3872  | 1.0804687 | hypothetical protein                                                   |      |            |
| CT543 | hisS   | 15751 | 1.0767884 | histidyl-tRNA synthetase                                               |      |            |
| CT012 | ybbP   | 9956  | 1.0632189 | hypothetical protein                                                   |      |            |
| CT294 | sodM   | 7590  | 1.0585806 | superoxide dismutase                                                   |      |            |
| CT533 | lpxC   | 10731 | 1.0577092 | UDP-3-O-[3-hydroxymyristoyl] N-acetylglucosamine deacetylase           |      |            |
| CT094 | truB   | 8753  | 1.0539123 | tRNA pseudouridine synthase B                                          |      |            |
| CT253 |        | 8157  | 1.041969  | hypothetical protein                                                   |      |            |
| CT046 | hctB   | 8006  | 1.0412061 | histone-like protein 2                                                 | Late | Late       |
| CT069 | ytgC   | 16666 | 1.0305912 | integral membrane protein                                              |      |            |
| CT090 | lcrD   | 26550 | 1.0293166 | low calcium response D                                                 |      | Midlate    |
| CT674 | yscC   | 34454 | 1.024511  | Yop proteins translocation protein C/general secretion pathway protein |      | Midlate II |
| CT320 | nusG   | 6491  | 1.0224418 | transcription antitermination protein NusG                             |      |            |
| CT070 | ytgD   | 11759 | 1.0208357 | integral membrane protein                                              |      |            |
| CT291 | ptsN_2 | 5515  | 1.0153351 | PTS IIA protein                                                        |      |            |
| CT535 | yciA   | 5518  | 1.0032389 | acyl-CoA hydrolase                                                     |      | Midlate    |
| CT044 | ssb    | 5479  | 0.9904083 | single-stranded DNA-binding protein                                    |      |            |
| CT327 | trpC   | 7187  | 0.9840054 | N-(5'-phosphoribosyl)anthranilate isomerase                            |      |            |
| CT476 |        | 11122 | 0.9823909 | hypothetical protein                                                   |      | Midlate    |
| CT821 | sucC   | 12691 | 0.9762476 | succinyl-CoA synthetase subunit beta                                   |      |            |
| CT027 | trmD   | 11482 | 0.96954   | tRNA (guanine-N(1)-)-methyltransferase/unknown domain fusion protein   |      |            |
| CT502 | ruvC   | 5580  | 0.9694396 | Holliday junction resolvase                                            |      |            |
| CT557 | lpdA   | 15592 | 0.9681899 | dihydrolipoamide dehydrogenase                                         |      |            |
| CT251 |        | 26994 | 0.9536828 | putative inner membrane protein translocase component YidC             |      |            |
| CT540 | yibK   | 5075  | 0.9465289 | rRNA methylase                                                         |      |            |
| CT532 | fabZ   | 5043  | 0.9388933 | (3R)-hydroxymyristoyl-ACP dehydratase                                  |      |            |
| CT521 | rplP   | 4418  | 0.9382922 | 50S ribosomal protein L16                                              |      |            |
| CT268 | amiA   | 8178  | 0.9377575 | N-acetylmuramoyl-L-alanine amidase                                     |      |            |
| CT362 | lysC   | 13835 | 0.9376548 | aspartate kinase                                                       |      |            |
| CT189 | gyrA_1 | 28606 | 0.9348411 | DNA gyrase subunit A                                                   |      |            |
| CT282 | gcsH   | 3820  | 0.9194834 | glycine cleavage system protein H                                      |      |            |
| CT273 |        | 6007  | 0.9185747 | hypothetical protein                                                   |      | Midlate    |
| CT700 |        | 15172 | 0.9137172 | hypothetical protein                                                   |      | Midlate    |
| CT872 | pmpH   | 33051 | 0.912142  | polymorphic outer membrane protein                                     | Late | Midlate    |
| CT295 | mrsA_1 | 19168 | 0.9095698 | phosphoglucomutase                                                     |      |            |
| CT354 | ksgA   | 8424  | 0.9040696 | dimethyladenosine transferase                                          |      |            |
| CT740 | dmpP   | 13855 | 0.9024917 | Na( )-translocating NADH-quinone reductase subunit F                   |      |            |
| CT266 |        | 12514 | 0.8951058 | hypothetical protein                                                   |      |            |
| CT836 | pheS   | 10563 | 0.8913559 | phenylalanyl-tRNA synthetase subunit alpha                             |      |            |
| CT218 | surE   | 8721  | 0.8879608 | stationary phase survival protein SurE                                 |      | Midlate    |
| CT669 | yscN   | 13889 | 0.8864376 | type III secretion system ATPase                                       |      | Midlate    |

|         |        |       |           |                                                            |       |            |
|---------|--------|-------|-----------|------------------------------------------------------------|-------|------------|
| CT461   | yael   | 9943  | 0.8823883 | phosphohydrolase                                           |       |            |
| CT278   | nqr2   | 15927 | 0.868281  | Na( )-translocating NADH-quinone reductase subunit B       |       | Midlate    |
| CT142   |        | 8598  | 0.867902  | hypothetical protein                                       |       | Midlate II |
| CT563   | yscS   | 2881  | 0.8626409 | Yop proteins translocation protein S                       |       |            |
| CT480   | oppA_4 | 20784 | 0.8541989 | oligopeptide binding lipoprotein                           | Early | Midlate    |
| CT728   |        | 7705  | 0.8515256 | hypothetical protein                                       |       |            |
| CT618   |        | 7634  | 0.850625  | hypothetical protein                                       |       | Midlate    |
| CT823   | htrA   | 14896 | 0.8489177 | DO Serine protease                                         |       |            |
| CT029   | rnhB   | 6397  | 0.8433331 | ribonuclease HII                                           |       |            |
| CT395   | grpE   | 5975  | 0.8398377 | HSP-70 cofactor                                            |       | Late       |
| CT283   |        | 20733 | 0.8392204 | hypothetical protein                                       |       |            |
| CT531   | lpxA   | 8592  | 0.8391524 | UDP-N-acetylglucosamine acyltransferase                    |       | Midlate    |
| CT841   | ftsH   | 27925 | 0.8387935 | ATP-dependent zinc protease                                |       | Late       |
| CT759   | nlpD   | 7179  | 0.8331568 | muramidase                                                 |       |            |
| CT652.1 |        | 1788  | 0.8330283 | hypothetical protein                                       |       |            |
| CT457   | yebC   | 6588  | 0.8321948 | hypothetical protein                                       |       | Late       |
| CT675   | karG   | 10730 | 0.8303431 | ATP:guanido phosphotransferase                             |       |            |
| CT710   | pckA   | 15918 | 0.8270178 | phosphoenolpyruvate carboxykinase                          |       | Midlate    |
| CT071   | yaeM   | 10984 | 0.8255771 | 1-deoxy-D-xylulose 5-phosphate reductoisomerase            |       |            |
| CT587   | eno    | 12754 | 0.8210394 | phosphopyruvate hydratase                                  |       |            |
| CT117   |        | 2974  | 0.8148149 | inclusion membrane protein F                               | Early |            |
| CT832   | nusB   | 4738  | 0.8066813 | transcription antitermination protein NusB                 |       |            |
| CT376   | mdhC   | 9064  | 0.8018162 | malate dehydrogenase                                       | Early | Midlate    |
| CT585   | trpS   | 9791  | 0.8008935 | tryptophanyl-tRNA synthetase                               |       |            |
| CT014   | cydB   | 10078 | 0.8007174 | cytochrome d ubiquinol oxidase subunit II                  |       | Midlate    |
| CT773   | ldh    | 9443  | 0.800319  | leucine dehydrogenase                                      |       |            |
| CT025   | ffh    | 12260 | 0.7985362 | signal recognition particle, subunit FFH/SRP54             |       |            |
| CT397   | vacB   | 18971 | 0.7968309 | exoribonuclease II                                         |       |            |
| CT486   | fliY   | 7469  | 0.7947251 | glutamine-binding protein                                  |       |            |
| CT542   | aspS   | 15770 | 0.7903122 | aspartyl-tRNA synthetase                                   |       |            |
| CT875   |        | 11136 | 0.7901522 | hypothetical protein                                       |       | Late       |
| CT286   | clpC   | 25165 | 0.7893601 | ClpC protease ATPase                                       |       | Midlate II |
| CT378   | pgi    | 14454 | 0.7854645 | glucose-6-phosphate isomerase                              |       | Midlate    |
| CT601   | papQ   | 5643  | 0.7845385 | invasin repeat-containing phosphatase                      |       |            |
| CT795   |        | 4731  | 0.7844806 | hypothetical protein                                       | Early |            |
| CT349   | maf    | 5394  | 0.782514  | Maf-like protein                                           |       |            |
| CT871   | pmpG   | 27645 | 0.7725738 | polymorphic outer membrane protein                         |       | Midlate    |
| CT330   |        | 2448  | 0.7701522 | hypothetical protein                                       |       |            |
| CT113   | clpB   | 23628 | 0.7697211 | Clp protease ATPase                                        |       |            |
| CT606.1 |        | 2022  | 0.7680308 | hypothetical protein                                       |       |            |
| CT536   | dnaQ_2 | 6877  | 0.755695  | DNA polymerase III subunit epsilon                         |       |            |
| CT215   | dhnA   | 9436  | 0.7493686 | fructose-bisphosphate aldolase                             |       | Midlate    |
| CT401   | gltT   | 10188 | 0.7492583 | glutamate symport                                          |       |            |
| CT023   | prfA   | 9631  | 0.7473857 | peptide chain release factor 1                             |       |            |
| CT265   | accA   | 8748  | 0.7431151 | acetyl-CoA carboxylase carboxyltransferase subunit alpha   |       |            |
| CT404   |        | 7043  | 0.7423473 | N6-adenine-specific DNA methylase                          |       |            |
| CT776   | aas    | 13814 | 0.7354244 | long chain fatty acid--[acyl-carrier-protein] ligase       |       | Late       |
| CT849   |        | 3954  | 0.7340779 | hypothetical protein                                       |       |            |
| CT422   |        | 4102  | 0.7297329 | metalloenzyme                                              |       |            |
| CT625   | nfo    | 7106  | 0.7290546 | endonuclease IV                                            |       |            |
| CT122   | efp_1  | 4787  | 0.7276601 | elongation factor P                                        |       |            |
| CT630   | cpxR   | 5609  | 0.7228291 | HTH transcriptional regulatory protein and receiver domain |       |            |

|         |           |       |           |                                                                    |         |
|---------|-----------|-------|-----------|--------------------------------------------------------------------|---------|
| CT657   |           | 2761  | 0.72082   | hypothetical protein                                               |         |
| CT750   | tktB      | 16109 | 0.7170629 | transketolase                                                      |         |
| CT733   |           | 11091 | 0.7126125 | hypothetical protein                                               | Late    |
| CT072   | yaeL      | 15073 | 0.7059336 | metalloprotease                                                    |         |
| CT239   | fabH      | 7402  | 0.7006368 | 3-oxoacyl-(acyl carrier protein) synthase III                      | Midlate |
| CT455   | murA      | 10427 | 0.6933554 | UDP-N-acetylglucosamine 1-carboxyvinyltransferase                  | Midlate |
| CT344   | lon       | 19769 | 0.6918818 | ATP-dependent protease La                                          | Midlate |
| CT421   |           | 5722  | 0.6909607 | hypothetical protein                                               |         |
| CT479   | oppB_2    | 12021 | 0.6888977 | oligopeptide permease                                              |         |
| CT237   | fabG      | 5803  | 0.6870492 | 3-ketoacyl-(acyl-carrier-protein) reductase                        | Midlate |
| CT003   | gatA      | 12398 | 0.6869712 | aspartyl/glutamyl-tRNA amidotransferase subunit A                  |         |
| CT822   | sucD      | 6586  | 0.6836571 | succinyl-CoA synthetase subunit alpha                              |         |
| CT212   |           | 3573  | 0.6834509 | hypothetical protein                                               | Late    |
| CT797   | pgsA_2    | 4700  | 0.6830251 | CDP-diacylglycerol--glycerol-3-phosphate 3-phosphatidyltransferase |         |
| CT260   |           | 4034  | 0.6735139 | hypothetical protein                                               |         |
| CT627   | yceA      | 8230  | 0.6725201 | hypothetical protein                                               |         |
| CT190   | gyrB      | 19288 | 0.6690327 | DNA gyrase subunit B                                               |         |
| CT053   |           | 3555  | 0.6679867 | hypothetical protein                                               | Midlate |
| CT116   |           | 3172  | 0.6639256 | inclusion membrane protein E                                       | Early   |
| CT030   | gmk       | 4928  | 0.6615267 | guanylate kinase                                                   |         |
| CT432   | glyA      | 11340 | 0.6573544 | serine hydroxymethyltransferase                                    | Midlate |
| CT804   | ychB      | 6647  | 0.6563911 | 4-diphosphocytidyl-2-C-methyl-D-erythritol kinase                  |         |
| CT303   |           | 3980  | 0.6560009 | hypothetical protein                                               |         |
| CT654   |           | 3709  | 0.6558302 | hypothetical protein                                               |         |
| CT408   | lspA      | 3720  | 0.6512336 | lipoprotein signal peptidase                                       | Midlate |
| CT560   |           | 6169  | 0.6500661 | hypothetical protein                                               |         |
| CT185   | zwf       | 11936 | 0.6426318 | glucose-6-phosphate 1-dehydrogenase                                |         |
| CT358   |           | 3829  | 0.6343157 | hypothetical protein                                               |         |
| CT704   | pcnB_2    | 9144  | 0.6329503 | polyA polymerase                                                   |         |
| CT735   | dagA_2    | 9486  | 0.6305126 | Na( )-linked D-alanine glycine permease                            | Early   |
| CT623   |           | 10090 | 0.628459  | hypothetical protein                                               |         |
| CT276   |           | 4132  | 0.6281464 | hypothetical protein                                               |         |
| CT004   | gatB      | 11233 | 0.6269354 | aspartyl/glutamyl-tRNA amidotransferase subunit B                  |         |
| CT820   | ftsY      | 6232  | 0.6266811 | cell division protein FtsY                                         |         |
| CT758   | murD      | 9220  | 0.6240406 | UDP-N-acetylmuramoyl-L-alanyl-D-glutamate synthetase               |         |
| CT089   | lcrE      | 9325  | 0.6221447 | low calcium response E                                             |         |
| CT363   | asd       | 7327  | 0.6218461 | aspartate-semialdehyde dehydrogenase                               | Midlate |
| CT448   | secD/secF | 30554 | 0.6211635 | bifunctional preprotein translocase subunit SecD/SecF              |         |
| CT399   | yrbH      | 7129  | 0.6210097 | GutQ/KpsF family sugar-P isomerase                                 |         |
| CT326.2 |           | 1309  | 0.6200574 | hypothetical protein                                               |         |
| CT445   | gltX      | 11370 | 0.6196809 | glutamyl-tRNA synthetase                                           |         |
| CT290   | ptsN_1    | 4700  | 0.6191686 | PTS IIA protein HTH DNA-binding domain                             |         |
| CT403   | yjFH      | 5672  | 0.6174237 | rRNA methylase                                                     |         |
| CT413   | pmpB      | 37899 | 0.6159743 | putative outer membrane protein B                                  | Midlate |
| CT304   | atpK      | 3006  | 0.6126116 | V-type ATP synthase subunit K                                      |         |
| CT040   | ruvB      | 6919  | 0.6120047 | Holliday junction DNA helicase RuvB                                | Late    |
| CT634   |           | 9651  | 0.6039711 | Na( )-translocating NADH-quinone reductase subunit A               | Midlate |
| CT137   | ywlC      | 5839  | 0.6024462 | SuA5 superfamily-related protein                                   |         |
| CT075   | dnaN      | 9062  | 0.60223   | DNA polymerase III subunit beta                                    |         |
| CT216   | xasA      | 10208 | 0.5956258 | glutamate/gamma-aminobutyrate antiporter                           | Midlate |
| CT332   | pykF      | 9902  | 0.5916113 | pyruvate kinase                                                    |         |

|       |           |       |           |                                                                                          |            |
|-------|-----------|-------|-----------|------------------------------------------------------------------------------------------|------------|
| CT281 | nqr5      | 5145  | 0.5910161 | Na( )-translocating NADH-quinone reductase subunit E                                     |            |
| CT337 | ptsH      | 2274  | 0.5882068 | phosphocarrier protein HPr                                                               |            |
| CT143 |           | 5720  | 0.5873744 | hypothetical protein                                                                     | Midlate II |
| CT271 |           | 1849  | 0.5865432 | hypothetical protein                                                                     |            |
| CT311 |           | 4748  | 0.583206  | hypothetical protein                                                                     |            |
| CT310 | atpE      | 4234  | 0.5830783 | V-type ATP synthase subunit E                                                            |            |
| CT091 | yscU      | 7200  | 0.582205  | type III secretion system protein                                                        |            |
| CT583 | gp6D      | 5289  | 0.5820642 | virulence plasmid protein pGP6-D-related protein                                         |            |
| CT608 | uvrD      | 13326 | 0.5814687 | DNA helicase                                                                             |            |
| CT631 |           | 1607  | 0.5692171 | hypothetical protein                                                                     |            |
| CT808 | cafE      | 10571 | 0.5691118 | ribonuclease E                                                                           |            |
| CT811 | plsX      | 6551  | 0.5675709 | putative glycerol-3-phosphate acyltransferase PlsX                                       |            |
| CT816 | glmS      | 12201 | 0.564756  | glucosamine--fructose-6-phosphate aminotransferase                                       | Midlate    |
| CT719 | fliF      | 6217  | 0.5641287 | type III secretion system protein                                                        |            |
| CT409 |           | 8768  | 0.557485  | amino acid permease                                                                      |            |
| CT032 | metG      | 11386 | 0.5563218 | methionyl-tRNA synthetase                                                                |            |
| CT045 | pepA      | 9917  | 0.5562577 | leucyl aminopeptidase                                                                    | Midlate    |
| CT178 |           | 7697  | 0.5548816 | hypothetical protein                                                                     |            |
| CT615 | rpoD      | 11485 | 0.5513154 | RNA polymerase sigma factor                                                              |            |
| CT869 | pmpE      | 19054 | 0.5502338 | polymorphic outer membrane protein                                                       | Late       |
| CT428 | ubiE      | 4407  | 0.5484824 | ubiquinone/menaquinone biosynthesis methyltransferase                                    |            |
| CT261 | dnaQ_1    | 4434  | 0.5477207 | DNA polymerase III subunit epsilon                                                       |            |
| CT123 | accB      | 3185  | 0.545436  | acetyl-CoA carboxylase biotin carboxyl carrier protein subunit                           |            |
| CT151 |           | 9724  | 0.5444222 | hypothetical protein                                                                     |            |
| CT466 |           | 2039  | 0.5442333 | hypothetical protein                                                                     |            |
| CT102 |           | 2958  | 0.5439093 | hypothetical protein                                                                     |            |
| CT729 | serS      | 8144  | 0.5378491 | seryl-tRNA synthetase                                                                    |            |
| CT373 |           | 3764  | 0.5377769 | hypothetical protein                                                                     | Midlate    |
| CT866 | glgB      | 13654 | 0.5363302 | glycogen branching enzyme                                                                |            |
| CT731 | ribA/ribB | 7970  | 0.5349674 | bifunctional 3,4-dihydroxy-2-butanone 4-phosphate synthase/GTP cyclohydrolase II protein |            |
| CT690 | dppD      | 5900  | 0.5337531 | peptide ABC transporter ATPase                                                           |            |
| CT099 | trxB      | 6736  | 0.5329169 | thioredoxin reductase                                                                    |            |
| CT853 |           | 3792  | 0.5274442 | hypothetical protein                                                                     |            |
| CT530 | fmt       | 5952  | 0.5266046 | methionyl-tRNA formyltransferase                                                         |            |
| CT011 |           | 7988  | 0.5262418 | hypothetical protein                                                                     |            |
| CT464 |           | 4090  | 0.5223911 | hydrolase, haloacid dehalogenase-like family                                             |            |
| CT696 |           | 7234  | 0.5221324 | hypothetical protein                                                                     |            |
| CT287 | mnmA      | 6673  | 0.5199122 | tRNA-specific 2-thiouridylase MnmA                                                       |            |
| CT293 | accD      | 5608  | 0.5186432 | acetyl-CoA carboxylase subunit beta                                                      |            |
| CT629 | glmU      | 3734  | 0.5146657 | glucosamine-1-phosphate acetyltransferase                                                |            |
| CT643 | topA      | 15566 | 0.5110588 | DNA topoisomerase I/SWI domain fusion protein                                            | Late       |
| CT490 |           | 1539  | 0.5073052 | hypothetical protein                                                                     |            |
| CT280 | nqr4      | 3945  | 0.5060098 | Na( )-translocating NADH-quinone reductase subunit D                                     |            |
| CT188 | tmk       | 3578  | 0.5021614 | thymidylate kinase                                                                       |            |
| CT062 | tyrS      | 6979  | 0.4995997 | tyrosyl-tRNA synthetase                                                                  | Midlate    |
| CT752 | efp_2     | 3221  | 0.4992798 | elongation factor P                                                                      | Midlate    |
| CT478 | oppC_2    | 10244 | 0.4952013 | oligopeptide permease                                                                    |            |
| CT121 | araD      | 3978  | 0.4908316 | ribulose-phosphate 3-epimerase                                                           |            |
| CT632 |           | 9227  | 0.4904951 | hypothetical protein                                                                     |            |
| CT186 | devB      | 4473  | 0.4896205 | 6-phosphogluconolactonase                                                                |            |
| CT606 | yggV      | 3508  | 0.4891117 | putative deoxyribonucleotide triphosphate pyrophosphatase                                |            |



|         |           |       |           |                                                                                  |       |            |
|---------|-----------|-------|-----------|----------------------------------------------------------------------------------|-------|------------|
| CT124   | accC      | 7786  | 0.4888949 | acetyl-CoA carboxylase biotin carboxylase subunit                                |       |            |
| CT737   |           | 3663  | 0.4883873 | SET domain containing protein                                                    |       |            |
| CT772   | ppa       | 3731  | 0.4847587 | inorganic pyrophosphatase                                                        |       |            |
| CT179   |           | 2938  | 0.4809041 | hypothetical protein                                                             |       |            |
| CT658   | sfhB      | 5562  | 0.4805112 | ribosomal large subunit pseudouridine synthase D                                 |       |            |
| CT447   | recJ      | 9659  | 0.4798463 | ssDNA exonuclease                                                                |       |            |
| CT388   |           | 1594  | 0.4790909 | hypothetical protein                                                             |       |            |
| CT064   | lepA      | 10142 | 0.4775047 | GTP-binding protein LepA                                                         |       |            |
| CT191   |           | 1970  | 0.4753534 | hypothetical protein                                                             |       |            |
| CT328   | tpiA      | 4418  | 0.4726208 | triosephosphate isomerase                                                        |       | Midlate    |
| CT112   | pepF      | 10253 | 0.4707544 | oligoendopeptidase F                                                             |       |            |
| CT248   | glgP      | 13521 | 0.4689512 | glycogen phosphorylase                                                           |       | Late       |
| CT223   |           | 4651  | 0.4679806 | hypothetical protein                                                             |       |            |
| CT568   |           | 2448  | 0.4665883 | hypothetical protein                                                             |       |            |
| CT501   | ruvA      | 3233  | 0.46638   | Holliday junction DNA helicase RuvA                                              |       |            |
| CT712   |           | 6330  | 0.4645087 | hypothetical protein                                                             | Late  | Late       |
| CT683   |           | 5259  | 0.4637615 | TPR-motif-containing protein                                                     |       |            |
| CT781   | lysS      | 8514  | 0.4616821 | lysyl-tRNA synthetase                                                            |       |            |
| CT727   | zntA      | 11052 | 0.461189  | metal transport P-type ATPase                                                    |       |            |
| CT141   | secA_1    | 2429  | 0.4596886 | protein translocase                                                              |       |            |
| CT176   | dsbB      | 2209  | 0.4520519 | putative disulfide oxidoreductase                                                |       |            |
| CT762   | murC/ddIA | 12791 | 0.4501852 | bifunctional D-alanyl-alanine synthetase A/UDP-N-acetylmuramate-L-alanine ligase |       |            |
| CT274   |           | 2063  | 0.4459109 | hypothetical protein                                                             |       |            |
| CT569   |           | 1675  | 0.4441434 | general secretion pathway protein G                                              |       |            |
| CT558   | lipA      | 4656  | 0.4407191 | lipoyl synthase                                                                  |       |            |
| CT254   |           | 4008  | 0.4405389 | hypothetical protein                                                             |       |            |
| CT104   | fabI      | 4672  | 0.4353836 | enoyl-(acyl carrier protein) reductase                                           |       |            |
| CT777   | bioF      | 5756  | 0.4349837 | 8-amino-7-oxononanoate synthase                                                  |       |            |
| CT182   | kdsB      | 3946  | 0.4334897 | 3-deoxy-manno-octulosonate cytidyltransferase                                    |       |            |
| CT435   | cysJ      | 5373  | 0.4323888 | sulfite reductase                                                                |       |            |
| CT562   | yscR      | 4425  | 0.4295247 | type III secretion system protein                                                |       |            |
| CT343   |           | 3159  | 0.4254714 | O-sialoglycoprotein endopeptidase family protein                                 |       |            |
| CT144   |           | 4163  | 0.4233208 | hypothetical protein                                                             |       | Midlate II |
| CT753   |           | 1123  | 0.4228033 | hypothetical protein                                                             |       |            |
| CT380   | phnP      | 3927  | 0.4219895 | metal-dependent hydrolase                                                        |       |            |
| CT564   | yyscT     | 4372  | 0.420643  | Yop proteins translocation protein T                                             |       |            |
| CT864   | xerD      | 4363  | 0.4196691 | site-specific tyrosine recombinase XerD                                          |       | Late       |
| CT689   | dppF      | 3841  | 0.4170842 | peptide ABC transporter ATPase                                                   |       |            |
| CT870   | pmpF      | 14606 | 0.4168276 | polymorphic outer membrane protein                                               |       | Midlate    |
| CT451   | cdsA      | 4619  | 0.4164956 | phosphatidate cytidyltransferase                                                 |       |            |
| CT494   | sohB      | 4843  | 0.4159425 | protease                                                                         |       | Midlate II |
| CT749   | alaS      | 13424 | 0.4141237 | alanyl-tRNA synthetase                                                           |       |            |
| CT211   |           | 2727  | 0.4138184 | hypothetical protein                                                             |       |            |
| CT576   | lcrH_1    | 3385  | 0.4119391 | low calcium response protein H                                                   | Late  | Late       |
| CT874   | pmpI      | 13112 | 0.4118268 | polymorphic outer membrane protein                                               |       | Midlate    |
| CT471   |           | 2844  | 0.4086567 | hypothetical protein                                                             |       |            |
| CT375   |           | 4934  | 0.4086315 | D-amino acid dehydrogenase                                                       | Early | Late       |
| CT187   | dnaX_1    | 4041  | 0.4073285 | DNA polymerase III subunit delta'                                                |       |            |
| CT485   | hemH      | 4536  | 0.4070157 | ferrochelatase                                                                   |       |            |
| CT444.1 |           | 1000  | 0.4057652 | hypothetical protein                                                             |       |            |
| CT128   | adk       | 3483  | 0.4052732 | adenylate kinase                                                                 |       |            |

|         |        |       |           |                                                                  |  |         |
|---------|--------|-------|-----------|------------------------------------------------------------------|--|---------|
| CT225   |        | 1733  | 0.4034372 | hypothetical protein                                             |  |         |
| CT462   | ispD   | 2997  | 0.4030244 | 2-C-methyl-D-erythritol 4-phosphate cytidyltransferase           |  |         |
| CT073   |        | 4720  | 0.4026073 | OMP [leader (19) peptide]                                        |  | Late    |
| CT581   | thrS   | 9116  | 0.4025994 | threonyl-tRNA synthetase                                         |  |         |
| CT203   |        | 3498  | 0.4021381 | hypothetical protein                                             |  |         |
| CT007   |        | 4582  | 0.4012493 | hypothetical protein                                             |  |         |
| CT817   | tyrP_1 | 5601  | 0.4012117 | tyrosine transporter                                             |  |         |
| CT452   | cmk    | 3001  | 0.4008297 | cytidylate kinase                                                |  |         |
| CT016   |        | 3159  | 0.4004206 | hypothetical protein                                             |  | Late    |
| CT599   | tolB   | 5863  | 0.4000129 | translocation protein TolB                                       |  |         |
| CT410   | pcnB_1 | 5799  | 0.400008  | polyA polymerase                                                 |  |         |
| CT210   | hemL   | 5828  | 0.399743  | glutamate-1-semialdehyde aminotransferase                        |  |         |
| CT551   | dacC   | 4778  | 0.3996084 | D-alanyl-D-alanine carboxypeptidase                              |  |         |
| CT377   | ltuA   | 614   | 0.3989196 | late transcription unit A protein                                |  | Midlate |
| CT547   |        | 4159  | 0.398025  | hypothetical protein                                             |  |         |
| CT393   | proS   | 8323  | 0.3958995 | prolyl-tRNA synthetase                                           |  |         |
| CT264   | msbA   | 9109  | 0.3940785 | transport ATP binding protein                                    |  |         |
| CT628   | ispA   | 4074  | 0.3940433 | dimethylallyltransferase                                         |  |         |
| CT114   |        | 6638  | 0.3921833 | hypothetical protein                                             |  |         |
| CT722   | pgm    | 3035  | 0.3903935 | phosphoglyceromutase                                             |  |         |
| CT636   | greA   | 9807  | 0.3873291 | transcript cleavage factor/unknown domain fusion protein         |  |         |
| CT453   | plsC   | 2853  | 0.3854495 | 1-acyl-sn-glycerol-3-phosphate acyltransferase                   |  |         |
| CT306   | atpD   | 2924  | 0.3806123 | V-type ATP synthase subunit D                                    |  |         |
| CT250   | dnaA   | 6120  | 0.3801993 | chromosomal replication initiation protein                       |  |         |
| CT814.1 |        | 1653  | 0.3796641 | hypothetical protein                                             |  | Late    |
| CT024   |        | 3734  | 0.376916  | N5-glutamine S-adenosyl-L-methionine-dependent methyltransferase |  |         |
| CT660   | gyrA_2 | 6577  | 0.3768013 | DNA topoisomerase IV subunit A                                   |  | Late    |
| CT103   |        | 4060  | 0.3756602 | HAD family phosphatase/phosphatase                               |  | Late    |
| CT038   |        | 1543  | 0.3752529 | hypothetical protein                                             |  |         |
| CT653   | yhbG   | 3182  | 0.3750792 | ABC transporter ATP-binding protein                              |  |         |
| CT850   |        | 5112  | 0.3742739 | hypothetical protein                                             |  | Early   |
| CT425   |        | 8319  | 0.3739003 | hypothetical protein                                             |  |         |
| CT372   |        | 5365  | 0.3736488 | hypothetical protein                                             |  | Midlate |
| CT546   |        | 4054  | 0.3732836 | hypothetical protein                                             |  | Late    |
| CT829   | trmB   | 2955  | 0.3706048 | tRNA (guanine-N(7)-)-methyltransferase                           |  | Late    |
| CT549   | rsbW   | 1991  | 0.370141  | sigma regulatory factor-histidine kinase                         |  |         |
| CT641   | ygeD   | 7251  | 0.3700856 | efflux protein                                                   |  |         |
| CT279   | nqr3   | 4236  | 0.3698926 | Na( )-translocating NADH-quinone reductase subunit C             |  |         |
| CT446   | euo    | 2326  | 0.3685475 | hypothetical protein                                             |  | Early   |
| CT034   | ytfF   | 4331  | 0.3680107 | cationic amino acid transporter                                  |  |         |
| CT673   | pkn5   | 6368  | 0.3672972 | S/T protein kinase                                               |  |         |
| CT812   | pmpD   | 19558 | 0.3649884 | polymorphic outer membrane protein                               |  |         |
| CT574   | pepP   | 4676  | 0.3645196 | aminopeptidase P                                                 |  |         |
| CT019   | ileS   | 13259 | 0.3629205 | isoleucyl-tRNA synthetase                                        |  |         |
| CT118   |        | 2223  | 0.3614338 | inclusion membrane protein G                                     |  | Early   |
| CT009   | yfgA   | 1764  | 0.3581835 | HTH transcriptional regulator                                    |  |         |
| CT782   | cysS   | 6272  | 0.3578625 | cysteinyl-tRNA synthetase                                        |  |         |
| CT434   | ispF   | 2150  | 0.3545767 | 2-C-methyl-D-erythritol 2,4-cyclodiphosphate synthase            |  |         |
| CT245   | pdhA   | 4311  | 0.3506622 | pyruvate dehydrogenase E1 component alpha subunit                |  |         |
| CT450   | yaeS   | 3110  | 0.3491009 | undecaprenyl pyrophosphate synthase                              |  |         |
| CT207   | pfkA_2 | 6946  | 0.3483596 | diphosphate--fructose-6-phosphate 1-phosphotransferase           |  |         |

|       |        |       |           |                                                                                 |      |         |
|-------|--------|-------|-----------|---------------------------------------------------------------------------------|------|---------|
| CT414 | pmpC   | 22572 | 0.3471195 | putative outer membrane protein C                                               |      | Midlate |
| CT357 |        | 1284  | 0.3460634 | hypothetical protein                                                            |      |         |
| CT307 | atpB   | 5524  | 0.3459628 | V-type ATP synthase subunit B                                                   |      |         |
| CT145 |        | 7356  | 0.3444141 | Serine/threonine protein kinase                                                 |      |         |
| CT272 | mraW   | 3662  | 0.3439276 | S-adenosyl-methyltransferase MraW                                               |      |         |
| CT693 | pgk    | 4542  | 0.3431838 | phosphoglycerate kinase                                                         |      | Late    |
| CT789 |        | 996   | 0.3428773 | hypothetical protein                                                            |      |         |
| CT761 | murG   | 4017  | 0.3405911 | undecaprenyldiphospho-muramoylpentapeptide beta-N-acetylglucosaminyltransferase |      |         |
| CT760 | ftsW   | 4357  | 0.3398325 | cell division protein FtsW                                                      |      |         |
| CT100 | acpS   | 1397  | 0.3395732 | 4'-phosphopantetheinyl transferase                                              |      |         |
| CT596 | exbB   | 2754  | 0.3369491 | polysaccharide transporter                                                      |      |         |
| CT238 | fabD   | 3389  | 0.3366875 | acyl-carrier-protein S-malonyltransferase                                       |      | Midlate |
| CT336 | ptsI   | 6533  | 0.3361421 | phosphoenolpyruvate-protein phosphotransferase                                  |      |         |
| CT302 | valS   | 10741 | 0.3344971 | valyl-tRNA synthetase                                                           |      |         |
| CT865 |        | 3770  | 0.3301376 | hypothetical protein                                                            |      |         |
| CT477 | ada    | 2007  | 0.3288016 | methylated-DNA protein - cysteine methyltransferase                             |      |         |
| CT751 | amn    | 3127  | 0.3223967 | AMP nucleosidase                                                                |      |         |
| CT697 | nth    | 2193  | 0.3217049 | endonuclease III                                                                |      |         |
| CT825 |        | 4751  | 0.3214358 | hypothetical protein                                                            |      |         |
| CT056 |        | 2667  | 0.3208982 | hypothetical protein                                                            |      |         |
| CT637 | tyrB   | 4550  | 0.3202653 | aromatic amino acid aminotransferase                                            |      |         |
| CT499 | lplA_2 | 2712  | 0.32025   | lipoate-protein ligase A                                                        |      |         |
| CT493 | polA   | 9657  | 0.3196767 | DNA polymerase I                                                                |      | Late    |
| CT258 | yhfO   | 4191  | 0.3191975 | NifS family pyridoxal phosphate-dependent protein                               |      |         |
| CT134 |        | 1609  | 0.3189933 | hypothetical protein                                                            |      |         |
| CT579 |        | 5238  | 0.3170557 | hypothetical protein                                                            | Late | Late    |
| CT577 |        | 1395  | 0.3167684 | hypothetical protein                                                            |      | Late    |
| CT148 | mhpA   | 5656  | 0.3156369 | FAD-dependent monooxygenase                                                     |      |         |
| CT194 | mgtE   | 5461  | 0.3144538 | Mg2 transporter                                                                 |      |         |
| CT814 |        | 1565  | 0.3133599 | hypothetical protein                                                            | Late | Late    |
| CT076 | smpB   | 1610  | 0.3128356 | SsrA-binding protein                                                            |      |         |
| CT394 | hrcA   | 4449  | 0.3120359 | heat-inducible transcription repressor                                          |      | Late    |
| CT732 | ribH   | 1689  | 0.3119077 | 6,7-dimethyl-8-ribityllumazine synthase                                         |      |         |
| CT379 | hflX   | 5052  | 0.3119004 | GTP binding protein                                                             |      |         |
| CT567 |        | 1886  | 0.3116997 | hypothetical protein                                                            |      |         |
| CT084 |        | 3993  | 0.3116736 | phospholipase D superfamily protein                                             |      | Late    |
| CT635 |        | 1663  | 0.3107204 | hypothetical protein                                                            |      | Midlate |
| CT463 | truA   | 2842  | 0.3101611 | tRNA pseudouridine synthase A                                                   |      |         |
| CT138 |        | 3509  | 0.3096179 | microsomal dipeptidase                                                          |      |         |
| CT711 |        | 8358  | 0.3088497 | hypothetical protein                                                            |      | Late    |
| CT340 | pdhA/B | 7368  | 0.308743  | 2-oxoisovalerate dehydrogenase alpha subunit                                    |      |         |
| CT374 | arcD   | 5258  | 0.3073178 | arginine/ornithine antiporter                                                   |      |         |
| CT679 | tsf    | 3166  | 0.3067647 | elongation factor Ts                                                            |      |         |
| CT256 |        | 4397  | 0.3059165 | hypothetical protein                                                            |      |         |
| CT214 |        | 5982  | 0.3032452 | hypothetical protein                                                            | Late | Late    |
| CT472 |        | 2837  | 0.3032118 | hypothetical protein                                                            |      |         |
| CT400 | sucB_2 | 4006  | 0.302543  | branched-chain alpha-keto acid dehydrogenase subunit E2                         |      |         |
| CT263 |        | 2118  | 0.3025216 | hypothetical protein                                                            |      |         |
| CT057 | gcpE   | 6487  | 0.3016625 | 4-hydroxy-3-methylbut-2-en-1-yl diphosphate synthase                            |      |         |
| CT140 | ypdP   | 2480  | 0.3011226 | hypothetical protein                                                            |      | Late    |
| CT748 | mfd    | 11798 | 0.3003734 | transcription-repair coupling factor                                            |      |         |

|         |        |       |           |                                                         |       |         |
|---------|--------|-------|-----------|---------------------------------------------------------|-------|---------|
| CT467   | atoS   | 3422  | 0.2982915 | 2-component regulatory system-sensor histidine kinase   |       |         |
| CT624   | mviN   | 5653  | 0.2978966 | integral membrane protein                               |       |         |
| CT545   | dnaE   | 13014 | 0.2974277 | DNA polymerase III subunit alpha                        |       |         |
| CT703   | engA   | 5115  | 0.2971275 | GTP-binding protein EngA                                |       |         |
| CT217   | ydaO   | 2366  | 0.2959351 | PP-loop superfamily ATPase                              |       |         |
| CT688   | parB   | 3096  | 0.2951474 | chromosome partitioning protein                         |       |         |
| CT575   | mutL   | 5731  | 0.29319   | DNA mismatch repair protein                             |       |         |
| CT497   | dnaB   | 4633  | 0.2910327 | replicative DNA helicase                                |       |         |
| CT329   | xseA   | 5105  | 0.2905075 | exodeoxyribonuclease VII large subunit                  |       |         |
| CT815   | glmM   | 4487  | 0.2897044 | phosphoglucosamine mutase                               |       |         |
| CT115   |        | 1440  | 0.288664  | inclusion membrane protein D                            | Early |         |
| CT262   |        | 2596  | 0.2885514 | hypothetical protein                                    |       |         |
| CT018   |        | 1544  | 0.2869658 | hypothetical protein                                    |       |         |
| CT252   | lgt    | 2571  | 0.2839016 | prolipoprotein diacylglycerol transferase               |       |         |
| CT845   |        | 885   | 0.2833383 | hypothetical protein                                    |       |         |
| CT335   |        | 1010  | 0.2821186 | hypothetical protein                                    |       |         |
| CT774   | cysQ   | 3095  | 0.281679  | 3'(2'),5'-bisphosphate nucleotidase                     | Early |         |
| CT181   |        | 2492  | 0.2806766 | hypothetical protein                                    |       | Late    |
| CT857   |        | 4268  | 0.2794381 | Na /H antiporter                                        |       |         |
| CT220   | ubiX   | 1818  | 0.2782167 | aromatic acid decarboxylase                             |       |         |
| CT848   |        | 1652  | 0.2779484 | hypothetical protein                                    |       | Late    |
| CT458   | YhhY   | 1576  | 0.2769883 | ribosomal-protein-alanine acetyltransferase             |       | Late    |
| CT529   |        | 2839  | 0.2768478 | hypothetical protein                                    | Early |         |
| CT063   | gnd    | 4433  | 0.2765677 | 6-phosphogluconate dehydrogenase                        |       |         |
| CT454   | argS   | 5361  | 0.2755128 | arginyl-tRNA synthetase                                 |       |         |
| CT684   |        | 4603  | 0.2753095 | cysteine desulfurase activator complex subunit SufB     |       |         |
| CT153   |        | 7850  | 0.2745301 | MAC/perforin family protein                             |       |         |
| CT297   | rnc    | 2272  | 0.273808  | ribonuclease III                                        |       |         |
| CT738   | yycJ   | 2490  | 0.2733444 | Zn-dependent hydrolase                                  |       |         |
| CT093   | ribF   | 2842  | 0.2699016 | bifunctional riboflavin kinase/FMN adenyllyltransferase |       |         |
| CT255   |        | 1240  | 0.2689725 | hypothetical protein                                    |       |         |
| CT305   | atpI   | 6006  | 0.2677309 | V-type ATP synthase subunit I                           |       |         |
| CT747   | hemE   | 3142  | 0.2661826 | uroporphyrinogen decarboxylase                          |       |         |
| CT247   | pdhC   | 4162  | 0.265296  | branched-chain alpha-keto acid dehydrogenase subunit E2 |       |         |
| CT209   | leuS   | 7504  | 0.2652656 | leucyl-tRNA synthetase                                  |       |         |
| CT108   | ybgl   | 2340  | 0.2650438 | Acr family transporter                                  |       |         |
| CT055   | sucB_1 | 3607  | 0.2649814 | dihydrolipoamide succinyltransferase                    |       |         |
| CT806   | ptr    | 8992  | 0.2637693 | insulinase family/protease III                          |       |         |
| CT851   | map    | 2684  | 0.2633291 | methionine aminopeptidase                               | Early |         |
| CT593.1 |        | 535   | 0.263319  | hypothetical protein                                    |       |         |
| CT360   |        | 1857  | 0.2630741 | hypothetical protein                                    |       | Midlate |
| CT129   | glnP   | 1905  | 0.2621251 | amino acid ABC transporter ATPase                       |       |         |
| CT644   | yohl   | 3112  | 0.2619993 | oxidoreductase                                          |       |         |
| CT805   |        | 4035  | 0.2588508 | hypothetical protein                                    |       |         |
| CT839   |        | 3092  | 0.2583614 | hypothetical protein                                    |       |         |
| CT765   | rsbV_2 | 1010  | 0.2582369 | anti-sigma F factor antagonist                          |       |         |
| CT578   |        | 4700  | 0.2564476 | hypothetical protein                                    | Late  | Late    |
| CT746   | hemN_2 | 4153  | 0.2562028 | coproporphyrinogen III oxidase                          |       |         |
| CT246   | pdhB   | 3059  | 0.2544424 | pyruvate dehydrogenase E1 component beta subunit        |       |         |
| CT390   | aspC   | 3386  | 0.2543222 | L,L-diaminopimelate aminotransferase                    |       |         |
| CT726   | rodA   | 3539  | 0.2537359 | rod shape protein                                       |       |         |
| CT257   |        | 3535  | 0.253551  | hypothetical protein                                    |       |         |

|        |        |      |           |                                                          |       |           |
|--------|--------|------|-----------|----------------------------------------------------------|-------|-----------|
| CT640  | recC   | 8446 | 0.2524235 | exodeoxyribonuclease V gamma chain                       |       |           |
| CT571  | gspE   | 4191 | 0.2516693 | general secretion pathway protein E                      |       |           |
| CT165  |        | 1233 | 0.250691  | hypothetical protein                                     |       |           |
| CT792  | mutS   | 7366 | 0.2505168 | DNA mismatch repair protein MutS                         |       |           |
| CT249  |        | 1026 | 0.2498815 | hypothetical protein                                     |       | Very late |
| CT423  |        | 3011 | 0.2492884 | CBS domain-containing protein                            |       |           |
| CT184  | yqgF   | 1382 | 0.247963  | Holliday junction resolvase-like protein                 |       |           |
| CT101  |        | 1331 | 0.2477702 | hypothetical protein                                     |       |           |
| CT418  | obgE   | 2759 | 0.2468727 | GTPase ObgE                                              |       |           |
| CT357R |        | 814  | 0.2458171 | hypothetical protein                                     |       |           |
| CT718  |        | 1432 | 0.2439438 | hypothetical protein                                     |       |           |
| CT259  |        | 1942 | 0.2433062 | PP2C phosphatase family protein                          |       | Midlate   |
| CT205  | pfkA_1 | 4677 | 0.2425351 | diphosphate--fructose-6-phosphate 1-phosphotransferase   |       |           |
| CT682  | pbpB   | 9550 | 0.242075  | penicillin-binding protein                               |       |           |
| CT594  | ycfH   | 2222 | 0.2414618 | PHP superfamily hydrolase                                |       |           |
| CT213  | rpiA   | 1940 | 0.241378  | ribose-5-phosphate isomerase A                           |       | Late      |
| CT875  |        | 1744 | 0.2409584 | hypothetical protein                                     |       | Late      |
| CT298  | radA   | 3735 | 0.2406721 | DNA repair protein RadA                                  |       |           |
| CT204  | ybhI   | 3924 | 0.2403154 | dicarboxylate translocator                               |       |           |
| CT232  | incB   | 921  | 0.2384298 | inclusion membrane protein B                             |       |           |
| CT015  | phoH   | 3546 | 0.2383474 | ATPase                                                   |       |           |
| CT622  |        | 5637 | 0.2373209 | hypothetical protein                                     |       | Late      |
| CT590  |        | 7982 | 0.2371093 | hypothetical protein                                     |       | Midlate   |
| CT475  | pheT   | 6554 | 0.236442  | phenylalanyl-tRNA synthetase subunit beta                |       |           |
| CT308  | atpA   | 4739 | 0.2360453 | V-type ATP synthase subunit A                            |       |           |
| CT200  | oppC_1 | 2311 | 0.2358847 | oligopeptide permease                                    |       |           |
| CT199  | oppB_1 | 2585 | 0.235836  | oligopeptide permease                                    |       |           |
| CT389  |        | 3314 | 0.2328829 | hypothetical protein                                     |       |           |
| CT350  |        | 4586 | 0.2325987 | hypothetical protein                                     |       |           |
| CT198  | oppA_3 | 4179 | 0.2318529 | oligopeptide binding protein                             |       |           |
| CT135  |        | 2861 | 0.2314952 | hypothetical protein                                     |       |           |
| CT855  | fumC   | 3688 | 0.2304661 | fumarate hydratase                                       |       |           |
| CT227  |        | 1072 | 0.229581  | hypothetical protein                                     |       |           |
| CT146  | ligA   | 5287 | 0.2290061 | NAD-dependent DNA ligase LigA                            |       |           |
| CT288  |        | 4660 | 0.2280746 | hypothetical protein                                     | Early | Late      |
| CT197  | gcp_1  | 2673 | 0.228024  | putative DNA-binding/iron metalloprotein/AP endonuclease |       |           |
| CT495  |        | 4218 | 0.2275143 | ADP/ATP translocase                                      | Early |           |
| CT796  | glyQ   | 7949 | 0.2267664 | glycyl-tRNA synthetase                                   |       |           |
| CT235  |        | 1100 | 0.226229  | CRP family transcriptional regulator                     |       |           |
| CT838  |        | 2950 | 0.2254509 | hypothetical protein                                     |       |           |
| CT791  | uvrC   | 4633 | 0.2237993 | excinuclease ABC subunit C                               |       |           |
| CT794  | dnaG   | 4405 | 0.2231074 | DNA primase                                              |       |           |
| CT847  |        | 1379 | 0.2226799 | hypothetical protein                                     | Late  |           |
| CT484  |        | 2589 | 0.2219261 | hypothetical protein                                     |       |           |
| CT417  |        | 2234 | 0.2210668 | metal transport protein                                  |       |           |
| CT130  | glnQ   | 1806 | 0.2207897 | amino acid ABC transporter ATPase                        |       |           |
| CT818  | tyrP_2 | 2823 | 0.2201534 | tyrosine transporter                                     |       |           |
| CT572  | gspD   | 5550 | 0.2200094 | general secretion pathway protein D                      |       |           |
| CT650  | recA   | 2749 | 0.2199874 | recombinase A                                            |       | Midlate   |
| CT676  |        | 1316 | 0.2198088 | hypothetical protein                                     |       |           |
| CT766  | miaA   | 2642 | 0.2193513 | tRNA delta(2)-isopentenylpyrophosphate transferase       |       |           |
| CT035  |        | 2042 | 0.2169937 | biotin protein ligase                                    | Early | Very late |

|         |         |      |           |                                                             |       |           |
|---------|---------|------|-----------|-------------------------------------------------------------|-------|-----------|
| CT284   |         | 3529 | 0.2161889 | phospholipase D                                             |       |           |
| CT826   | pssA    | 2022 | 0.2157327 | CDP-diacylglycerol--serine O-phosphatidyltransferase        |       |           |
| CT127   | ydhO    | 2086 | 0.2155457 | polysaccharide hydrolase invasins repeat-containing protein |       |           |
| CT620   |         | 6468 | 0.2128328 | hypothetical protein                                        |       | Late      |
| CT229   |         | 1583 | 0.211273  | hypothetical protein                                        | Early |           |
| CT456   |         | 7582 | 0.2109943 | hypothetical protein                                        |       | Late      |
| CT604   | groEL_2 | 3888 | 0.2109403 | HSP-60                                                      |       |           |
| CT277   |         | 1623 | 0.2095808 | hypothetical protein                                        |       |           |
| CT496.1 |         | 318  | 0.2089303 | hypothetical protein                                        |       |           |
| CT856   | ychM    | 3994 | 0.2072116 | sulfate transporter                                         |       |           |
| CT616   |         | 2947 | 0.2066732 | hypothetical protein                                        |       |           |
| CT698   | trmE    | 3139 | 0.2065532 | tRNA modification GTPase TrmE                               |       |           |
| CT483   |         | 889  | 0.2060415 | hypothetical protein                                        |       |           |
| CT059   | fer     | 613  | 0.2058454 | ferredoxin                                                  |       |           |
| CT685   |         | 1808 | 0.2057169 | ABC transporter ATP-binding protein                         |       |           |
| CT301   | pknD    | 6482 | 0.2040098 | serine/threonine-protein kinase                             |       |           |
| CT566   |         | 2408 | 0.2037279 | hypothetical protein                                        |       |           |
| CT240   | recR    | 1378 | 0.2027102 | recombination protein RecR                                  |       |           |
| CT331   | dxs     | 4408 | 0.20156   | 1-deoxy-D-xylulose-5-phosphate synthase                     |       |           |
| CT052   | hemN_1  | 2472 | 0.1994579 | coproporphyrinogen III oxidase                              |       | Late      |
| CT206   |         | 1937 | 0.1985244 | acyltransferase family protein                              |       |           |
| CT183   | pyrG    | 4053 | 0.1974824 | CTP synthetase                                              |       |           |
| CT767   |         | 2362 | 0.1972917 | hypothetical protein                                        |       |           |
| CT633   | hemB    | 2292 | 0.1972412 | delta-aminolevulinic acid dehydratase                       |       |           |
| CT201   | oppD    | 1933 | 0.1972003 | oligopeptide transport ATPase                               |       |           |
| CT088   | sycE    | 946  | 0.1970457 | secretion chaperone                                         |       |           |
| CT677   | frr     | 1291 | 0.1963105 | ribosome recycling factor                                   |       |           |
| CT221.1 |         | 295  | 0.1962349 | hypothetical protein                                        |       |           |
| CT270   | pbp3    | 4226 | 0.1947033 | penicillin-binding protein                                  |       |           |
| CT586   | uvrB    | 4497 | 0.1946438 | excinuclease ABC subunit B                                  |       |           |
| CT387   |         | 4533 | 0.1942975 | hypothetical protein                                        |       |           |
| CT109   |         | 1805 | 0.1939423 | hypothetical protein                                        |       |           |
| CT807   | plsB    | 2316 | 0.1926208 | glycerol-3-phosphate acyltransferase                        |       |           |
| CT488   |         | 1701 | 0.1926079 | hypothetical protein                                        |       |           |
| CT844   | yfhC    | 1058 | 0.1925757 | cytosine deaminase                                          |       |           |
| CT481   |         | 1608 | 0.1923757 | hypothetical protein                                        |       |           |
| CT010   | htrB    | 3066 | 0.1920098 | lipid A biosynthesis lauroyl acyltransferase                |       |           |
| CT573   |         | 2563 | 0.190617  | hypothetical protein                                        |       |           |
| CT384   |         | 3503 | 0.1882578 | hypothetical protein                                        |       |           |
| CT427   |         | 1791 | 0.1877179 | hypothetical protein                                        |       |           |
| CT008   | rnhB_1  | 1939 | 0.1873852 | ribonuclease HIII                                           |       |           |
| CT714   | gpsA    | 2067 | 0.1870994 | NAD(P)H-dependent glycerol-3-phosphate dehydrogenase        |       |           |
| CT309   |         | 1691 | 0.1869014 | hypothetical protein                                        |       |           |
| CT061   | fliA    | 1632 | 0.1865393 | RNA polymerase sigma factor sigma-28                        |       |           |
| CT208   | gseA    | 2466 | 0.1857514 | 3-deoxy-D-manno-octulosonic-acid transferase                |       |           |
| CT742   | ygcA    | 2489 | 0.1839789 | rRNA methyltransferase                                      |       |           |
| CT147   |         | 9577 | 0.1830891 | hypothetical protein                                        | Early |           |
| CT846   |         | 1387 | 0.1828684 | hypothetical protein                                        |       |           |
| CT739   | ftsK    | 4818 | 0.1808686 | cell division protein FtsK                                  |       |           |
| CT580   |         | 2001 | 0.1790066 | hypothetical protein                                        |       |           |
| CT426   |         | 2247 | 0.1745589 | hypothetical protein                                        |       |           |
| CT745   | hemG    | 2503 | 0.1738093 | protoporphyrinogen oxidase                                  |       | Very late |

|       |         |      |           |                                                                  |       |         |
|-------|---------|------|-----------|------------------------------------------------------------------|-------|---------|
| CT391 |         | 2047 | 0.1728824 | hypothetical protein                                             |       |         |
| CT033 | recD_1  | 4455 | 0.1721867 | exodeoxyribonuclease V alpha chain                               |       |         |
| CT854 |         | 3535 | 0.1719491 | ABC transporter permease fused to pyrimidine biosynthesis enzyme |       |         |
| CT152 | ycfV    | 1338 | 0.1711803 | ABC transporter ATPase                                           |       |         |
| CT687 | yfhO_1  | 2409 | 0.1707869 | cysteine desulfurase                                             |       |         |
| CT755 | groEL_3 | 2898 | 0.1706142 | 60 kDa chaperonin GroEL                                          |       |         |
| CT837 |         | 4162 | 0.1703334 | hypothetical protein                                             |       |         |
| CT338 |         | 868  | 0.1678384 | hypothetical protein                                             |       |         |
| CT459 | prfB    | 2087 | 0.1672115 | peptide chain release factor 2                                   |       | Late    |
| CT285 | lplA_1  | 1414 | 0.1665363 | lipoate-protein ligase A                                         |       |         |
| CT570 | gspF    | 2020 | 0.1664476 | general secretion pathway protein F                              |       |         |
| CT346 | elaC    | 1731 | 0.1659126 | ribonuclease Z                                                   |       | Midlate |
| CT730 | ribD    | 2197 | 0.1644965 | riboflavin deaminase                                             |       |         |
| CT555 |         | 6927 | 0.1632644 | SWI/SNF family helicase                                          |       |         |
| CT548 |         | 1101 | 0.1621617 | hypothetical protein                                             |       |         |
| CT020 | lepB    | 3533 | 0.1618725 | signal peptidase I                                               |       |         |
| CT721 | yfhO_2  | 2143 | 0.1617244 | NifS-related protein                                             |       |         |
| CT809 |         | 590  | 0.1610418 | hypothetical protein                                             |       |         |
| CT164 |         | 513  | 0.1609203 | hypothetical protein                                             |       |         |
| CT595 | dsbD    | 4034 | 0.1606704 | Thio:disulfide interchange protein                               |       |         |
| CT489 | glgC    | 2348 | 0.1571834 | glucose-1-phosphate adenylyltransferase                          |       | Late    |
| CT171 | trpA    | 1417 | 0.1565569 | tryptophan synthase subunit alpha                                |       |         |
| CT415 | yebL    | 1530 | 0.1564621 | solute-binding protein                                           |       |         |
| CT756 | murF    | 2479 | 0.1560224 | UDP-N-acetylmuramoyl-tripeptide--D-alanyl-D- alanine ligase      |       |         |
| CT534 | Int     | 2984 | 0.1559149 | apolipoprotein N-acyltransferase                                 |       |         |
| CT299 | hemC    | 1282 | 0.1553369 | porphobilinogen deaminase                                        |       |         |
| CT725 | birA    | 905  | 0.1537204 | biotin--protein ligase                                           |       |         |
| CT325 |         | 766  | 0.1535967 | hypothetical protein                                             |       |         |
| CT863 |         | 2595 | 0.1534407 | hypothetical protein                                             |       |         |
| CT365 |         | 3076 | 0.1529762 | hypothetical protein                                             | Early | Late    |
| CT695 |         | 2068 | 0.1505797 | hypothetical protein                                             |       | Late    |
| CT366 | aroA    | 2266 | 0.1502589 | 3-phosphoshikimate 1-carboxyvinyltransferase                     |       |         |
| CT383 |         | 1193 | 0.1493602 | hypothetical protein                                             |       |         |
| CT867 |         | 1788 | 0.1492081 | hypothetical protein                                             | Late  |         |
| CT473 |         | 484  | 0.1482725 | hypothetical protein                                             | Early |         |
| CT202 | oppF    | 1311 | 0.147785  | oligopeptide transport ATPase                                    |       |         |
| CT085 |         | 2960 | 0.1475025 | hypothetical protein                                             |       |         |
| CT591 | sdhB    | 1128 | 0.1464399 | succinate dehydrogenase iron-sulfur subunit                      |       |         |
| CT609 | rpoN    | 2236 | 0.14533   | RNA polymerase factor sigma-54                                   |       |         |
| CT642 |         | 1424 | 0.1450648 | hypothetical protein                                             |       |         |
| CT226 |         | 865  | 0.1419387 | hypothetical protein                                             |       |         |
| CT233 | incC    | 842  | 0.1408246 | inclusion membrane protein C                                     |       | Early   |
| CT382 | aroG    | 1374 | 0.1408199 | 3-deoxy-7-phosphoheptulonate synthase                            |       |         |
| CT054 | sucA    | 4784 | 0.140411  | 2-oxoglutarate dehydrogenase E1 component                        |       |         |
| CT720 |         | 1286 | 0.1401839 | NifU-related protein                                             |       |         |
| CT231 |         | 2431 | 0.1398317 | sodium-dependent amino acid transporter                          |       |         |
| CT862 | lcrH_2  | 939  | 0.1393661 | type III secretion chaperone                                     |       |         |
| CT167 |         | 2061 | 0.1392746 | hypothetical protein                                             |       |         |
| CT224 |         | 691  | 0.1392554 | hypothetical protein                                             |       |         |
| CT351 |         | 3241 | 0.139119  | hypothetical protein                                             |       |         |
| CT133 |         | 1285 | 0.1385044 | rRNA methylase                                                   | Early |         |

|       |        |      |           |                                                                                                            |         |
|-------|--------|------|-----------|------------------------------------------------------------------------------------------------------------|---------|
| CT222 |        | 588  | 0.1380921 | hypothetical protein                                                                                       |         |
| CT083 |        | 797  | 0.1371928 | hypothetical protein                                                                                       | Late    |
| CT416 |        | 1102 | 0.1360971 | ABC transporter ATPase                                                                                     |         |
| CT724 |        | 818  | 0.1360734 | hypothetical protein                                                                                       |         |
| CT440 |        | 555  | 0.1356558 | hypothetical protein                                                                                       |         |
| CT078 | folD   | 1275 | 0.1354628 | bifunctional 5,10-methylene-tetrahydrofolate dehydrogenase/ 5,10-methylene-tetrahydrofolate cyclohydrolase |         |
| CT699 | psdD   | 1467 | 0.1353472 | phosphatidylserine decarboxylase                                                                           |         |
| CT487 | yhhF   | 891  | 0.1337155 | methyltransferase                                                                                          |         |
| CT219 | ubiA   | 1377 | 0.132743  | prenyltransferase                                                                                          |         |
| CT778 | priA   | 3461 | 0.1319877 | primosome assembly protein PriA                                                                            |         |
| CT092 | ychF   | 1639 | 0.1317055 | GTP-dependent nucleic acid-binding protein EngD                                                            |         |
| CT754 | icc    | 1233 | 0.1310967 | phosphohydrolase                                                                                           |         |
| CT619 |        | 4090 | 0.1301223 | hypothetical protein                                                                                       | Late    |
| CT470 | recO   | 1049 | 0.1289733 | DNA repair protein RecO                                                                                    |         |
| CT831 | murB   | 1154 | 0.1287518 | UDP-N-acetylenolpyruvylglucosamine reductase                                                               |         |
| CT367 | aroL   | 777  | 0.1282924 | shikimate kinase                                                                                           |         |
| CT042 | glgX   | 3011 | 0.1271869 | glycogen hydrolase (debranching)                                                                           |         |
| CT860 |        | 2155 | 0.1260855 | hypothetical protein                                                                                       |         |
| CT605 | ybbC   | 1739 | 0.1257743 | hypothetical protein                                                                                       |         |
| CT840 | mesJ   | 1479 | 0.1250478 | PP-loop superfamily ATPase                                                                                 | Late    |
| CT647 |        | 752  | 0.1247678 | hypothetical protein                                                                                       |         |
| CT074 | recF   | 1611 | 0.1246503 | recombination protein F                                                                                    |         |
| CT757 | mraY   | 1455 | 0.1246252 | phospho-N-acetylmuramoyl-pentapeptide- transferase                                                         |         |
| CT345 |        | 535  | 0.1242902 | hypothetical protein                                                                                       |         |
| CT411 | lpxB   | 2574 | 0.1220138 | lipid-A-disaccharide synthase                                                                              |         |
| CT119 | incA   | 1094 | 0.1219109 | inclusion membrane protein A                                                                               |         |
| CT244 |        | 1765 | 0.1212154 | hypothetical protein                                                                                       |         |
| CT588 | rbsU   | 2677 | 0.1211403 | sigma regulatory family protein-PP2C phosphatase                                                           |         |
| CT079 |        | 561  | 0.121091  | hypothetical protein                                                                                       |         |
| CT597 | exbD   | 516  | 0.1210728 | biopolymer transport protein                                                                               |         |
| CT060 | flhA   | 2459 | 0.1189491 | type III secretion system protein                                                                          |         |
| CT139 | oppA_1 | 1719 | 0.1185962 | oligopeptide binding protein                                                                               |         |
| CT077 | yojL   | 1180 | 0.1184424 | hypothetical protein                                                                                       |         |
| CT465 |        | 828  | 0.1171992 | hypothetical protein                                                                                       |         |
| CT131 |        | 4604 | 0.1157573 | transmembrane protein                                                                                      |         |
| CT193 | tgt    | 1476 | 0.1153986 | queuine tRNA-ribosyltransferase                                                                            |         |
| CT047 |        | 1244 | 0.1140327 | hypothetical protein                                                                                       |         |
| CT175 | oppA_2 | 2040 | 0.1110075 | oligopeptide binding protein permease                                                                      | Early   |
| CT607 | ung    | 847  | 0.1100326 | uracil-DNA glycosylase                                                                                     |         |
| CT638 |        | 1042 | 0.1095896 | rod shape-determining protein MreC                                                                         |         |
| CT779 |        | 776  | 0.1082689 | hypothetical protein                                                                                       |         |
| CT468 | atoC   | 1434 | 0.108057  | 2-component regulatory system-ATPase                                                                       |         |
| CT370 | aroDE  | 1775 | 0.1063869 | bifunctional 3-dehydroquinate dehydratase/shikimate dehydrogenase protein                                  |         |
| CT195 |        | 1274 | 0.1062684 | hypothetical protein                                                                                       |         |
| CT441 | tsp    | 2573 | 0.1058073 | tail-specific protease                                                                                     | Late    |
| CT662 | hemA   | 1176 | 0.1055538 | glutamyl-tRNA reductase                                                                                    | Midlate |
| CT639 | recB   | 3694 | 0.1055358 | exodeoxyribonuclease V beta chain                                                                          |         |
| CT234 |        | 3436 | 0.1053527 | hypothetical protein                                                                                       |         |
| CT648 |        | 1438 | 0.102275  | hypothetical protein                                                                                       | Early   |
| CT168 |        | 324  | 0.1012498 | hypothetical protein                                                                                       |         |



(b)

| Gene ID | Gene Symbol | Read Count | RPKM       | Gene Name                                                | Belland Classifier | Nicholson Classifier |
|---------|-------------|------------|------------|----------------------------------------------------------|--------------------|----------------------|
| CT1444  | omcA        | 2306       | 87.7747516 | 9kDa-cysteine-rich lipoprotein                           | Late               | Late                 |
| CT229   |             | 2383       | 38.4263261 | hypothetical protein                                     | Early              |                      |
| CT081   |             | 1177       | 37.4773225 | hypothetical protein                                     |                    | Very late            |
| CT603   | ahpC        | 1599       | 28.5122655 | thioredoxin peroxidase                                   |                    |                      |
| CT065   |             | 3849       | 26.89672   | ADP/ATP translocase                                      | Early              |                      |
| CT734   |             | 1484       | 22.1086671 | hypothetical protein                                     | Early              | Midlate              |
| CT617   | rpsT        | 624        | 22.0062654 | 30S ribosomal protein S20                                |                    |                      |
| CT786   | rpmJ        | 284        | 21.9935572 | 50S ribosomal protein L36                                |                    |                      |
| CT446   | euo         | 1006       | 19.5368495 | hypothetical protein                                     | Early              |                      |
| CT117   |             | 560        | 17.595967  | inclusion membrane protein F                             | Early              |                      |
| CT116   |             | 661        | 17.4526724 | inclusion membrane protein E                             | Early              |                      |
| CT134   |             | 702        | 17.3484556 | hypothetical protein                                     |                    |                      |
| CT228   |             | 908        | 17.0485483 | hypothetical protein                                     | Early              |                      |
| CT785   | rpmH        | 173        | 14.5362477 | 50S ribosomal protein L34                                |                    |                      |
| CT843   | rpsO        | 345        | 14.4435029 | 30S ribosomal protein S15                                |                    |                      |
| CT794.1 |             | 374        | 13.5264828 | hypothetical protein                                     |                    |                      |
| CT500   | ndk         | 569        | 13.3095475 | nucleoside diphosphate kinase                            |                    | Midlate              |
| CT018   |             | 508        | 13.060744  | hypothetical protein                                     |                    |                      |
| CT508   | rs11        | 463        | 12.6846902 | 30S ribosomal protein S11                                |                    |                      |
| CT602   |             | 458        | 12.0117368 | hypothetical protein                                     |                    |                      |
| CT787   | rpsN        | 291        | 11.3135052 | 30S ribosomal protein S14                                |                    |                      |
| CT524   | rpsS        | 249        | 11.0926694 | 30S ribosomal protein S19                                |                    |                      |
| CT802   | rpsR        | 255        | 10.6373142 | 30S ribosomal protein S18                                |                    |                      |
| CT801   | rpsF        | 320        | 10.614898  | 30S ribosomal protein S6                                 |                    |                      |
| CT080   | ltuB        | 281        | 10.511727  | late transcription unit B protein                        | Late               | Late                 |
| CT316   | rplL        | 339        | 10.494848  | 50S ribosomal protein L7/L12                             |                    |                      |
| CT135   |             | 1002       | 10.1194002 | hypothetical protein                                     |                    |                      |
| CT022   | rpmE2       | 327        | 9.9843869  | 50S ribosomal protein L31 type B                         |                    |                      |
| CT342   | rpsU        | 142        | 9.8207615  | 30S ribosomal protein S21                                |                    |                      |
| CT509   | rpsM        | 319        | 9.3592016  | 30S ribosomal protein S13                                |                    |                      |
| CT439m  | rpsL        | 303        | 8.9849504  | 30S ribosomal protein S12                                |                    |                      |
| CT795   |             | 383        | 8.8247604  | hypothetical protein                                     | Early              |                      |
| CT525   | rplB        | 735        | 8.7146543  | 50S ribosomal protein L2                                 |                    |                      |
| CT526   | rplW        | 246        | 8.4948625  | 50S ribosomal protein L23                                |                    |                      |
| CT834   | rplM        | 140        | 8.2391597  | 50S ribosomal protein L35                                |                    |                      |
| CT569   |             | 270        | 8.1425376  | general secretion pathway protein G                      |                    |                      |
| CT784   | rnpA        | 254        | 7.9963338  | ribonuclease P                                           |                    |                      |
| CT115   |             | 330        | 7.9944854  | inclusion membrane protein D                             | Early              |                      |
| CT319   | rplK        | 300        | 7.7923786  | 50S ribosomal protein L11                                |                    |                      |
| CT421.1 |             | 101        | 7.7402745  | hypothetical protein                                     |                    |                      |
| CT317   | rplJ        | 374        | 7.6551861  | 50S ribosomal protein L10                                |                    |                      |
| CT523   | rplV        | 188        | 7.4062165  | 50S ribosomal protein L22                                |                    |                      |
| CT265   | accA        | 642        | 7.2790527  | acetyl-CoA carboxylase carboxyltransferase subunit alpha |                    |                      |
| CT810   | rpmF        | 114        | 7.1804193  | 50S ribosomal protein L32                                |                    |                      |
| CT398.1 |             | 896        | 7.1613702  | Ribonuclease P RNA                                       |                    |                      |
| CT421.2 |             | 99         | 7.0918647  | hypothetical protein                                     |                    |                      |
| CT438   | rs7         | 291        | 6.9443567  | 30S ribosomal protein S7                                 |                    |                      |
| CT568   |             | 311        | 6.9425411  | hypothetical protein                                     |                    |                      |

|         |      |      |           |                                                      |       |           |
|---------|------|------|-----------|------------------------------------------------------|-------|-----------|
| CT659   |      | 152  | 6.8134292 | hypothetical protein                                 | Late  | Late      |
| CT150   | rpmG | 85   | 6.7045597 | 50S ribosomal protein L33                            |       |           |
| CT318   | rplA | 397  | 6.6948475 | 50S ribosomal protein L1                             |       |           |
| CT518   | rplN | 210  | 6.3617879 | 50S ribosomal protein L14                            |       |           |
| CT443   | omcB | 1039 | 6.1710133 | 60kD cysteine-rich outer membrane protein            | Late  | Late      |
| CT322   | tuf  | 670  | 6.1607117 | elongation factor Tu                                 |       |           |
| CT026   | rpsP | 178  | 6.0953965 | 30S ribosomal protein S16                            |       |           |
| CT125   | rplM | 256  | 6.0072041 | 50S ribosomal protein L13                            |       |           |
| CT402   | lpxK | 698  | 5.9644665 | tetraacyldisaccharide 4'-kinase                      |       |           |
| CT513   | rplR | 193  | 5.9340593 | 50S ribosomal protein L18                            |       |           |
| CT618   |      | 415  | 5.881029  | hypothetical protein                                 |       | Midlate   |
| CT803   | rplI | 277  | 5.84832   | 50S ribosomal protein L9                             |       |           |
| CT519   | rpsQ | 135  | 5.6762988 | 30S ribosomal protein S17                            |       |           |
| CT506   | rplQ | 221  | 5.6699312 | 50S ribosomal protein L17                            |       |           |
| CT528   | rplC | 308  | 5.6467981 | 50S ribosomal protein L3                             |       |           |
| CT507   | rpoA | 625  | 5.6401849 | DNA-directed RNA polymerase subunit alpha            |       |           |
| CT517   | rplX | 153  | 5.6058867 | 50S ribosomal protein L24                            |       |           |
| CT098   | rpsA | 882  | 5.5326116 | 30S ribosomal protein S1                             |       |           |
| CT409   |      | 710  | 5.5246412 | amino acid permease                                  |       |           |
| CT647   |      | 303  | 5.4690497 | hypothetical protein                                 |       |           |
| CT147   |      | 2156 | 5.4657397 | hypothetical protein                                 | Early | Very late |
| CT691   |      | 346  | 5.33416   | hypothetical protein                                 |       |           |
| CT565   |      | 212  | 5.2395889 | hypothetical protein                                 | Late  | Late      |
| CT799   | ctc  | 288  | 5.1598131 | 50S ribosomal protein L25/general stress protein Ctc |       |           |
| CT835   | rplT | 163  | 5.0284141 | 50S ribosomal protein L20                            |       |           |
| CT512   | rpsE | 213  | 4.9882387 | 30S ribosomal protein S5                             |       |           |
| CT126   | rpsI | 149  | 4.9733706 | 30S ribosomal protein S9                             |       |           |
| CT420   | rplU | 156  | 4.862071  | 50S ribosomal protein L21                            |       |           |
| CT833   | infC | 223  | 4.8054049 | translation initiation factor IF-3                   |       |           |
| CT326.2 |      | 79   | 4.762166  | hypothetical protein                                 |       |           |
| CT567   |      | 239  | 4.7369079 | hypothetical protein                                 |       |           |
| CT086   | rpmB | 113  | 4.6541717 | 50S ribosomal protein L28                            |       |           |
| CT398   |      | 334  | 4.6252794 | hypothetical protein                                 |       |           |
| CT522   | rpsC | 277  | 4.5980187 | 30S ribosomal protein S3                             |       |           |
| CT221   | yqfU | 387  | 4.5267681 | hypothetical protein                                 |       |           |
| CT511   | rplO | 188  | 4.5056723 | 50S ribosomal protein L15                            |       |           |
| CT118   |      | 242  | 4.3247408 | inclusion membrane protein G                         | Early |           |
| CT514   | rplF | 223  | 4.3073965 | 50S ribosomal protein L6                             |       |           |
| CT648   |      | 493  | 4.19834   | hypothetical protein                                 |       |           |
| CT516   | rplE | 189  | 4.1667211 | 50S ribosomal protein L5                             |       |           |
| CT436   | rpsJ | 110  | 4.1026185 | 30S ribosomal protein S10                            |       |           |
| CT249   |      | 128  | 4.0990471 | hypothetical protein                                 |       | Very late |
| CT573   |      | 467  | 4.0737107 | hypothetical protein                                 |       |           |
| CT527   | rplD | 274  | 4.0619628 | 50S ribosomal protein L4                             |       |           |
| CT437   | fusA | 777  | 4.0478134 | elongation factor G                                  |       |           |
| CT572   | gspD | 844  | 4.0006388 | general secretion pathway protein D                  |       |           |
| CT626   | rpsD | 230  | 3.9992337 | 30S ribosomal protein S4                             |       |           |
| CT520   | rpmC | 83   | 3.9330767 | 50S ribosomal protein L29                            |       |           |
| CT377   | ltuA | 76   | 3.9194882 | late transcription unit A protein                    |       | Midlate   |
| CT571   | gspE | 558  | 3.9171093 | general secretion pathway protein E                  |       |           |
| CT832   | nusB | 180  | 3.8710798 | transcription antitermination protein NusB           |       |           |
| CT515   | rpsH | 154  | 3.8421699 | 30S ribosomal protein S8                             |       |           |

|       |        |      |           |                                                                      |       |          |
|-------|--------|------|-----------|----------------------------------------------------------------------|-------|----------|
| CT341 | dnaJ   | 379  | 3.7427793 | chaperone protein DnaJ                                               |       |          |
| CT343 |        | 192  | 3.3995728 | O-sialoglycoprotein endopeptidase family protein                     |       |          |
| CT735 | dagA_2 | 444  | 3.1230752 | Na( )-linked D-alanine glycine permease                              | Early |          |
| CT111 | groES  | 91   | 3.082376  | co-chaperonin GroES                                                  | Early |          |
| CT419 | rpmA   | 66   | 3.0421696 | 50S ribosomal protein L27                                            |       |          |
| CT095 | rbfA   | 113  | 3.0155688 | ribosome-binding factor A                                            |       |          |
| CT498 | gidA   | 484  | 3.0051616 | tRNA uridine 5-carboxymethylaminomethyl modification enzyme GidA     |       |          |
| CT723 | yjbC   | 224  | 2.9879276 | ribosomal large subunit pseudouridine synthase B                     |       |          |
| CT028 | rplS   | 109  | 2.9638218 | 50S ribosomal protein L19                                            |       |          |
| CT775 |        | 198  | 2.9076679 | 1-acyl-sn-glycerol-3-phosphate acyltransferase                       |       |          |
| CT314 | rpoC   | 1098 | 2.8219162 | DNA-directed RNA polymerase subunit beta'                            |       |          |
| CT521 | rplP   | 131  | 2.7961337 | 50S ribosomal protein L16                                            |       |          |
| CT169 | trpR   | 82   | 2.7728044 | Trp operon repressor                                                 |       |          |
| CT867 |        | 254  | 2.7474293 | hypothetical protein                                                 | Late  |          |
| CT570 | gspF   | 283  | 2.7060197 | general secretion pathway protein F                                  |       |          |
| CT327 | trpC   | 150  | 2.7059324 | N-(5'-phosphoribosyl)anthranilate isomerase                          |       |          |
| CT809 |        | 66   | 2.6971523 | hypothetical protein                                                 |       |          |
| CT529 |        | 272  | 2.6939747 | hypothetical protein                                                 | Early |          |
| CT566 |        | 263  | 2.6882372 | hypothetical protein                                                 |       |          |
| CT110 | groEL  | 384  | 2.6829135 | chaperonin GroEL                                                     | Early | Midcycle |
| CT096 | infB   | 611  | 2.5912625 | translation initiation factor IF-2                                   |       |          |
| CT097 | nusA   | 270  | 2.4909793 | transcription elongation factor NusA                                 |       |          |
| CT315 | rpoB   | 812  | 2.475575  | DNA-directed RNA polymerase subunit beta                             |       |          |
| CT321 | secE   | 59   | 2.4504893 | preprotein translocase subunit SecE                                  |       |          |
| CT025 | ffh    | 288  | 2.4388213 | signal recognition particle, subunit FFH/SRP54                       |       |          |
| CT510 | secY   | 299  | 2.4092502 | preprotein translocase subunit SecY                                  |       |          |
| CT401 | glitT  | 315  | 2.3706737 | glutamate symport                                                    |       |          |
| CT842 | pnp    | 442  | 2.3693412 | polynucleotide phosphorylase/polyadenylase                           |       | Midlate  |
| CT285 | lplA_1 | 145  | 2.3525831 | lipoate-protein ligase A                                             |       |          |
| CT136 |        | 160  | 2.304708  | lysophospholipase esterase                                           |       |          |
| CT496 | pgsA_1 | 112  | 2.2922814 | CDP-diacylglycerol--glycerol-3-phosphate 3-phosphatidyltransferase   |       | Midlate  |
| CT788 |        | 100  | 2.2701766 | leader (60) peptide-periplasmic                                      |       |          |
| CT768 |        | 342  | 2.1965764 | hypothetical protein                                                 |       | Midlate  |
| CT505 | gapA   | 187  | 2.1909558 | glyceraldehyde-3-phosphate dehydrogenase                             |       | Midlate  |
| CT808 | cafE   | 330  | 2.1492329 | ribonuclease E                                                       |       |          |
| CT383 |        | 118  | 2.0917038 | hypothetical protein                                                 |       |          |
| CT320 | nusG   | 106  | 2.051111  | transcription antitermination protein NusG                           |       |          |
| CT504 |        | 135  | 1.995123  | hypothetical protein                                                 |       | Midlate  |
| CT310 | atpE   | 124  | 1.9894525 | V-type ATP synthase subunit E                                        |       |          |
| CT405 | ribC   | 89   | 1.9839052 | riboflavin synthase subunit alpha                                    |       |          |
| CT353 | def    | 74   | 1.9784532 | peptide deformylase                                                  |       |          |
| CT027 | trmD   | 197  | 1.9611041 | tRNA (guanine-N(1)-)-methyltransferase/unknown domain fusion protein |       |          |
| CT292 | dut    | 89   | 1.9591035 | deoxyuridine 5'-triphosphate nucleotidohydrolase                     |       |          |
| CT046 | hctB   | 113  | 1.9300894 | histone-like protein 2                                               | Late  | Late     |
| CT005 |        | 176  | 1.926978  | hypothetical protein                                                 |       | Late     |
| CT288 |        | 307  | 1.9231752 | hypothetical protein                                                 | Early | Late     |
| CT287 | mnmA   | 201  | 1.9185056 | tRNA-specific 2-thiouridylase MnmA                                   |       |          |
| CT182 | kdsB   | 142  | 1.8348909 | 3-deoxy-manno-octulosonate cytidyltransferase                        |       |          |
| CT836 | pheS   | 182  | 1.8241992 | phenylalanyl-tRNA synthetase subunit alpha                           |       |          |
| CT214 |        | 278  | 1.7854991 | hypothetical protein                                                 | Late  | Late     |
| CT800 | pth    | 74   | 1.764235  | peptidyl-tRNA hydrolase                                              |       |          |
| CT579 |        | 223  | 1.7564259 | hypothetical protein                                                 | Late  | Late     |

|       |           |     |           |                                                                                          |       |            |
|-------|-----------|-----|-----------|------------------------------------------------------------------------------------------|-------|------------|
| CT495 |           | 249 | 1.7408536 | ADP/ATP translocase                                                                      | Early |            |
| CT017 |           | 188 | 1.7345002 | hypothetical protein                                                                     |       | Late       |
| CT554 | brnQ      | 204 | 1.7029149 | branched chain amino acid ABC transporter carrier protein                                |       |            |
| CT841 | ftsH      | 450 | 1.6985594 | ATP-dependent zinc protease                                                              |       | Late       |
| CT492 | coaE      | 89  | 1.6979562 | dephospho-CoA kinase                                                                     |       | Midlate II |
| CT731 | ribA/ribB | 202 | 1.6974322 | bifunctional 3,4-dihydroxy-2-butanone 4-phosphate synthase/GTP cyclohydrolase II protein |       |            |
| CT736 | ybcL      | 93  | 1.6969612 | hypothetical protein                                                                     |       |            |
| CT678 | pyrH      | 109 | 1.6788329 | uridylate kinase                                                                         |       |            |
| CT029 | rnhB      | 100 | 1.6384954 | ribonuclease HII                                                                         |       |            |
| CT359 |           | 100 | 1.6359142 | hypothetical protein                                                                     |       |            |
| CT066 |           | 74  | 1.565509  | hypothetical protein                                                                     |       | Midlate    |
| CT133 |           | 110 | 1.5653594 | rRNA methylase                                                                           | Early |            |
| CT180 | tauB      | 94  | 1.5420385 | nitrate/iron ABC transporter ATPase                                                      |       |            |
| CT703 | engA      | 197 | 1.4893178 | GTP-binding protein EngA                                                                 |       |            |
| CT284 |           | 211 | 1.4880551 | phospholipase D                                                                          |       |            |
| CT348 | yjjK      | 204 | 1.4578815 | ABC transporter ATPase                                                                   |       |            |
| CT094 | truB      | 98  | 1.4465584 | tRNA pseudouridine synthase B                                                            |       |            |
| CT538 |           | 83  | 1.3874105 | hypothetical protein                                                                     |       |            |
| CT129 | glnP      | 95  | 1.3764455 | amino acid ABC transporter ATPase                                                        |       |            |
| CT875 |           | 154 | 1.3742533 | hypothetical protein                                                                     |       | Late       |
| CT776 | aas       | 213 | 1.3444105 | long chain fatty acid--[acyl-carrier-protein] ligase                                     |       | Late       |
| CT035 |           | 94  | 1.3245183 | biotin protein ligase                                                                    | Early | Very late  |
| CT217 | ydaO      | 70  | 1.3228236 | PP-loop superfamily ATPase                                                               |       |            |
| CT601 | papQ      | 71  | 1.3158358 | invasin repeat-containing phosphatase                                                    |       |            |
| CT364 | dapB      | 83  | 1.3137126 | dihydrodipicolinate reductase                                                            |       |            |
| CT811 | plsX      | 98  | 1.2130594 | putative glycerol-3-phosphate acyltransferase PlsX                                       |       |            |
| CT429 |           | 112 | 1.2109531 | hypothetical protein                                                                     |       |            |
| CT313 | tal       | 123 | 1.2007853 | transaldolase B                                                                          |       | Midlate    |
| CT264 | msbA      | 229 | 1.1727573 | transport ATP binding protein                                                            |       |            |
| CT543 | hisS      | 109 | 1.1594402 | histidyl-tRNA synthetase                                                                 |       |            |
| CT034 | ytfF      | 110 | 1.1488303 | cationic amino acid transporter                                                          |       |            |
| CT820 | ftsY      | 90  | 1.1437511 | cell division protein FtsY                                                               |       |            |
| CT397 | vacB      | 199 | 1.1199961 | exoribonuclease II                                                                       |       |            |
| CT445 | gltX      | 138 | 1.1180688 | glutamyl-tRNA synthetase                                                                 |       |            |
| CT410 | pcnB_1    | 119 | 1.107962  | polyA polymerase                                                                         |       |            |
| CT183 | pyrG      | 147 | 1.0955577 | CTP synthetase                                                                           |       |            |
| CT613 | folP      | 116 | 1.093358  | dihydropteroate synthase                                                                 |       |            |
| CT422 |           | 56  | 1.0884551 | metalloenzyme                                                                            |       |            |
| CT857 |           | 129 | 1.0657594 | Na /H antiporter                                                                         |       |            |
| CT293 | accD      | 104 | 1.0473762 | acetyl-CoA carboxylase subunit beta                                                      |       |            |

(c)

| Gene ID | Gene Symbol | Read Count | RPKM       | Gene Name                    | Belland Classifier | Nicholson Classifier |
|---------|-------------|------------|------------|------------------------------|--------------------|----------------------|
| CT1229  |             | 2383       | 38.4263261 | hypothetical protein         | Early              |                      |
| CT446   | euo         | 1006       | 19.5368495 | hypothetical protein         | Early              |                      |
| CT117   |             | 560        | 17.595967  | inclusion membrane protein F | Early              |                      |
| CT116   |             | 661        | 17.4526724 | inclusion membrane protein E | Early              |                      |
| CT134   |             | 702        | 17.3484556 | hypothetical protein         |                    |                      |
| CT794.1 |             | 374        | 13.5264828 | hypothetical protein         |                    |                      |
| CT018   |             | 508        | 13.060744  | hypothetical protein         |                    |                      |
| CT135   |             | 1002       | 10.1194002 | hypothetical protein         |                    |                      |

|         |           |      |           |                                                                                          |       |           |
|---------|-----------|------|-----------|------------------------------------------------------------------------------------------|-------|-----------|
| CT795   |           | 383  | 8.8247604 | hypothetical protein                                                                     | Early |           |
| CT569   |           | 270  | 8.1425376 | general secretion pathway protein G                                                      |       |           |
| CT115   |           | 330  | 7.9944854 | inclusion membrane protein D                                                             | Early |           |
| CT265   | accA      | 642  | 7.2790527 | acetyl-CoA carboxylase carboxyltransferase subunit alpha                                 |       |           |
| CT568   |           | 311  | 6.9425411 | hypothetical protein                                                                     |       |           |
| CT618   |           | 415  | 5.881029  | hypothetical protein                                                                     |       | Midlate   |
| CT409   |           | 710  | 5.5246412 | amino acid permease                                                                      |       |           |
| CT647   |           | 303  | 5.4690497 | hypothetical protein                                                                     |       |           |
| CT147   |           | 2156 | 5.4657397 | hypothetical protein                                                                     | Early | Very late |
| CT326.2 |           | 79   | 4.762166  | hypothetical protein                                                                     |       |           |
| CT567   |           | 239  | 4.7369079 | hypothetical protein                                                                     |       |           |
| CT118   |           | 242  | 4.3247408 | inclusion membrane protein G                                                             | Early |           |
| CT648   |           | 493  | 4.19834   | hypothetical protein                                                                     |       |           |
| CT249   |           | 128  | 4.0990471 | hypothetical protein                                                                     |       | Very late |
| CT573   |           | 467  | 4.0737107 | hypothetical protein                                                                     |       |           |
| CT572   | gspD      | 844  | 4.0006388 | general secretion pathway protein D                                                      |       |           |
| CT377   | ltuA      | 76   | 3.9194882 | late transcription unit A protein                                                        |       | Midlate   |
| CT571   | gspE      | 558  | 3.9171093 | general secretion pathway protein E                                                      |       |           |
| CT832   | nusB      | 180  | 3.8710798 | transcription antitermination protein NusB                                               |       |           |
| CT343   |           | 192  | 3.3995728 | O-sialoglycoprotein endopeptidase family protein                                         |       |           |
| CT735   | dagA_2    | 444  | 3.1230752 | Na( )-linked D-alanine glycine permease                                                  | Early |           |
| CT723   | yjbC      | 224  | 2.9879276 | ribosomal large subunit pseudouridine synthase B                                         |       |           |
| CT521   | rplP      | 131  | 2.7961337 | 50S ribosomal protein L16                                                                |       |           |
| CT867   |           | 254  | 2.7474293 | hypothetical protein                                                                     | Late  |           |
| CT570   | gspF      | 283  | 2.7060197 | general secretion pathway protein F                                                      |       |           |
| CT327   | trpC      | 150  | 2.7059324 | N-(5'-phosphoribosyl)anthranilate isomerase                                              |       |           |
| CT809   |           | 66   | 2.6971523 | hypothetical protein                                                                     |       |           |
| CT529   |           | 272  | 2.6939747 | hypothetical protein                                                                     | Early |           |
| CT566   |           | 263  | 2.6882372 | hypothetical protein                                                                     |       |           |
| CT025   | ffh       | 288  | 2.4388213 | signal recognition particle, subunit FFH/SRP54                                           |       |           |
| CT401   | gltT      | 315  | 2.3706737 | glutamate symport                                                                        |       |           |
| CT285   | lplA_1    | 145  | 2.3525831 | lipoate-protein ligase A                                                                 |       |           |
| CT808   | cafE      | 330  | 2.1492329 | ribonuclease E                                                                           |       |           |
| CT383   |           | 118  | 2.0917038 | hypothetical protein                                                                     |       |           |
| CT310   | atpE      | 124  | 1.9894525 | V-type ATP synthase subunit E                                                            |       |           |
| CT027   | trmD      | 197  | 1.9611041 | tRNA (guanine-N(1)-)-methyltransferase/unknown domain fusion protein                     |       |           |
| CT005   |           | 176  | 1.926978  | hypothetical protein                                                                     |       | Late      |
| CT288   |           | 307  | 1.9231752 | hypothetical protein                                                                     | Early | Late      |
| CT287   | mnmA      | 201  | 1.9185056 | tRNA-specific 2-thiouridylase MnmA                                                       |       |           |
| CT182   | kdsB      | 142  | 1.8348909 | 3-deoxy-manno-octulosonate cytidyltransferase                                            |       |           |
| CT836   | pheS      | 182  | 1.8241992 | phenylalanyl-tRNA synthetase subunit alpha                                               |       |           |
| CT214   |           | 278  | 1.7854991 | hypothetical protein                                                                     | Late  | Late      |
| CT579   |           | 223  | 1.7564259 | hypothetical protein                                                                     | Late  | Late      |
| CT495   |           | 249  | 1.7408536 | ADP/ATP translocase                                                                      | Early |           |
| CT841   | ftsH      | 450  | 1.6985594 | ATP-dependent zinc protease                                                              |       | Late      |
| CT731   | ribA/ribB | 202  | 1.6974322 | bifunctional 3,4-dihydroxy-2-butanone 4-phosphate synthase/GTP cyclohydrolase II protein |       |           |
| CT029   | rnhB      | 100  | 1.6384954 | ribonuclease HII                                                                         |       |           |
| CT133   |           | 110  | 1.5653594 | rRNA methylase                                                                           | Early |           |

(d)

| Gene ID | Gene Symbol | Read Count | RPKM       | Gene Name                      | Belland Classifier | Nicholson Classifier |
|---------|-------------|------------|------------|--------------------------------|--------------------|----------------------|
| CT444   | omcA        | 127957     | 41.3098306 | 9kDa-cysteine-rich lipoprotein | Late               | Late                 |

|         |       |        |            |                                                      |       |            |
|---------|-------|--------|------------|------------------------------------------------------|-------|------------|
| CT398.1 |       | 643636 | 40.5691459 | Ribonuclease P RNA                                   |       |            |
| CT480.1 |       | 73708  | 38.6236333 | hypothetical protein                                 |       |            |
| CT081   |       | 73971  | 20.2924577 | hypothetical protein                                 |       | Very late  |
| CT843   | rpsO  | 50153  | 15.5987122 | 30S ribosomal protein S15                            |       |            |
| CT500   | ndk   | 76467  | 15.3072401 | nucleoside diphosphate kinase                        |       | Midlate    |
| CT786   | rpmJ  | 20419  | 12.5496176 | 50S ribosomal protein L36                            |       |            |
| CT565   |       | 62310  | 12.0735255 | hypothetical protein                                 | Late  | Late       |
| CT267   | ihfA  | 40326  | 11.3153837 | integration host factor alpha-subunit                |       | Midlate    |
| CT802   | rpsR  | 26456  | 9.4316339  | 30S ribosomal protein S18                            |       |            |
| CT691   |       | 71911  | 8.8706087  | hypothetical protein                                 |       |            |
| CT001   |       | 24863  | 8.5347422  | hypothetical protein                                 |       | Late       |
| CT801   | rpsF  | 29993  | 7.5920442  | 30S ribosomal protein S6                             |       |            |
| CT460   |       | 22915  | 7.5726935  | SWIB (YM74) complex protein                          |       |            |
| CT617   | rpsT  | 27018  | 7.5392159  | 30S ribosomal protein S20                            |       |            |
| CT236   | acpP  | 20443  | 7.3940661  | acyl carrier protein                                 |       | Late       |
| CT785   | rpmH  | 9254   | 6.1648024  | 50S ribosomal protein L34                            |       |            |
| CT342   | rpsU  | 12427  | 5.9863725  | 30S ribosomal protein S21                            |       |            |
| CT787   | rpsN  | 19929  | 5.6307961  | 30S ribosomal protein S14                            |       |            |
| CT110   | groEL | 118535 | 5.6049313  | chaperonin GroEL                                     | Early | Midcycle   |
| CT313   | tal   | 60213  | 5.2089728  | transaldolase B                                      |       | Midlate    |
| CT803   | rplI  | 29363  | 5.0321246  | 50S ribosomal protein L9                             |       |            |
| CT421.1 |       | 9013   | 4.8485025  | hypothetical protein                                 |       |            |
| CT659   |       | 12601  | 4.6324643  | hypothetical protein                                 | Late  |            |
| CT666   |       | 13854  | 4.6052756  | hypothetical protein                                 |       | Midlate    |
| CT443   | omcB  | 93722  | 4.5613878  | 60kD cysteine-rich outer membrane protein            | Late  | Late       |
| CT421.2 |       | 7988   | 4.225818   | hypothetical protein                                 |       |            |
| CT665   |       | 12322  | 4.1355825  | hypothetical protein                                 |       | Midlate    |
| CT080   | ltuB  | 13295  | 4.0063474  | late transcription unit B protein                    | Late  | Late       |
| CT508   | rs11  | 18331  | 3.9853128  | 30S ribosomal protein S11                            |       |            |
| CT022   | rpmE2 | 15024  | 3.9273089  | 50S ribosomal protein L31 type B                     |       |            |
| CT667   |       | 20465  | 3.9027617  | hypothetical protein                                 |       | Midlate    |
| CT769   | ybeB  | 16012  | 3.8385283  | iojap superfamily protein                            |       |            |
| CT784   | rnpA  | 15941  | 3.7951152  | ribonuclease P                                       |       |            |
| CT439m  | rpsL  | 16299  | 3.765468   | 30S ribosomal protein S12                            |       |            |
| CT316   | rplL  | 17851  | 3.7372915  | 50S ribosomal protein L7/L12                         |       |            |
| CT603   | ahpC  | 25986  | 3.6922763  | thioredoxin peroxidase                               |       |            |
| CT734   |       | 28454  | 3.6534982  | hypothetical protein                                 | Early | Midlate    |
| CT312   |       | 15384  | 3.5870277  | ferredoxin                                           |       |            |
| CT398   |       | 32071  | 3.4770503  | hypothetical protein                                 |       |            |
| CT834   | rpmI  | 7760   | 3.4706333  | 50S ribosomal protein L35                            |       |            |
| CT111   | groES | 13068  | 3.3814939  | co-chaperonin GroES                                  | Early |            |
| CT125   | rplM  | 18752  | 3.372223   | 50S ribosomal protein L13                            |       |            |
| CT798   | glgA  | 55307  | 3.3212414  | glycogen synthase                                    | Late  | Midlate II |
| CT610   |       | 25742  | 3.160319   | hypothetical protein                                 |       | Midlate    |
| CT438   | rs7   | 16920  | 3.1323866  | 30S ribosomal protein S7                             |       |            |
| CT799   | ctc   | 19657  | 3.0598038  | 50S ribosomal protein L25/general stress protein Ctc |       |            |
| CT538   |       | 25296  | 2.977701   | hypothetical protein                                 |       |            |
| CT436   | rpsJ  | 11541  | 2.9189718  | 30S ribosomal protein S10                            |       |            |
| CT509   | rpsM  | 12326  | 2.8410084  | 30S ribosomal protein S13                            |       |            |
| CT043   |       | 16792  | 2.8024988  | hypothetical protein                                 |       | Midlate    |
| CT098   | rpsA  | 57918  | 2.7880614  | 30S ribosomal protein S1                             |       |            |
| CT322   | tuf   | 39654  | 2.7333683  | elongation factor Tu                                 |       |            |

|         |        |        |           |                                                                    |      |            |
|---------|--------|--------|-----------|--------------------------------------------------------------------|------|------------|
| CT431   | clpP_1 | 18178  | 2.6612342 | ATP-dependent Clp protease proteolytic subunit                     |      | Midlate    |
| CT492   | coaE   | 18910  | 2.6478869 | dephospho-CoA kinase                                               |      | Midlate II |
| CT556   |        | 13990  | 2.6421887 | hypothetical protein                                               |      |            |
| CT842   | pnp    | 65530  | 2.6250557 | polynucleotide phosphorylase/polyadenylase                         |      | Midlate    |
| CT524   | rpsS   | 7858   | 2.616983  | 30S ribosomal protein S19                                          |      |            |
| CT525   | rplB   | 25344  | 2.5759787 | 50S ribosomal protein L2                                           |      |            |
| CT526   | rplW   | 10018  | 2.5756043 | 50S ribosomal protein L23                                          |      |            |
| CT743   | hctA   | 12364  | 2.5526242 | histone-like developmental protein                                 | Late |            |
| CT086   | rpmB   | 8004   | 2.533681  | 50S ribosomal protein L28                                          |      |            |
| CT126   | rpsI   | 11841  | 2.5242464 | 30S ribosomal protein S9                                           |      |            |
| CT420   | rplU   | 9496   | 2.4953092 | 50S ribosomal protein L21                                          |      |            |
| CT429   |        | 28343  | 2.449707  | hypothetical protein                                               |      |            |
| CT833   | infC   | 14340  | 2.4247053 | translation initiation factor IF-3                                 |      |            |
| CT810   | rpmF   | 4904   | 2.3450274 | 50S ribosomal protein L32                                          |      |            |
| CT559   | yscJ   | 26652  | 2.3395025 | Yop proteins translocation lipoprotein J                           |      | Midlate    |
| CT790   |        | 13678  | 2.3306351 | hypothetical protein                                               |      |            |
| CT437   | fusA   | 56695  | 2.2873179 | elongation factor G                                                |      |            |
| CT835   | rplT   | 9723   | 2.2648471 | 50S ribosomal protein L20                                          |      |            |
| CT348   | yjiK   | 42774  | 2.2642508 | ABC transporter ATPase                                             |      |            |
| CT317   | rplJ   | 14199  | 2.2620724 | 50S ribosomal protein L10                                          |      |            |
| CT783   |        | 27295  | 2.2464743 | disulfide bond isomerase                                           | Late | Midlate II |
| CT066   |        | 12552  | 2.245391  | hypothetical protein                                               |      | Midlate    |
| CT503   |        | 14131  | 2.197132  | hypothetical protein                                               |      |            |
| CT289   |        | 29146  | 2.1952028 | hypothetical protein                                               |      | Midlate    |
| CT770   | fabF   | 31571  | 2.1720252 | 3-oxoacyl-(acyl carrier protein) synthase II                       |      | Midlate    |
| CT663   |        | 9604   | 2.169652  | hypothetical protein                                               |      | Midlate    |
| CT602   |        | 10266  | 2.1656992 | hypothetical protein                                               |      |            |
| CT706   | clpP   | 15625  | 2.1351812 | ATP-dependent Clp protease proteolytic subunit                     |      |            |
| CT319   | rplK   | 10789  | 2.1327013 | 50S ribosomal protein L11                                          |      |            |
| CT655   | kdsA   | 20420  | 2.1252619 | 2-dehydro-3-deoxyphosphooctonate aldolase                          |      |            |
| CT355   |        | 25003  | 2.1249158 | hypothetical protein                                               |      |            |
| CT496   | pgsA_1 | 12332  | 2.1034452 | CDP-diacylglycerol--glycerol-3-phosphate 3-phosphatidyltransferase |      | Midlate    |
| CT506   | rplQ   | 10804  | 2.0885137 | 50S ribosomal protein L17                                          |      |            |
| CT613   | folP   | 32485  | 2.0593882 | dihydropteroate synthase                                           |      |            |
| CT507   | rpoA   | 28260  | 2.0554132 | DNA-directed RNA polymerase subunit alpha                          |      |            |
| CT314   | rpoC   | 101160 | 2.0481621 | DNA-directed RNA polymerase subunit beta'                          |      |            |
| CT819   | yccA   | 17201  | 2.035041  | transport permease                                                 |      | Midlate    |
| CT292   | dut    | 10150  | 2.0202431 | deoxyuridine 5'-triphosphate nucleotidohydrolase                   |      |            |
| CT705   | clpX   | 30160  | 1.9804951 | ATP-dependent protease ATP-binding subunit ClpX                    |      |            |
| CT150   | rpmG   | 3497   | 1.9714612 | 50S ribosomal protein L33                                          |      |            |
| CT095   | rbfA   | 8586   | 1.957213  | ribosome-binding factor A                                          |      |            |
| CT707   | tig    | 31162  | 1.9523891 | trigger factor                                                     |      |            |
| CT382.1 |        | 4576   | 1.9399025 | hypothetical protein                                               |      |            |
| CT242   |        | 12065  | 1.9111798 | OmpH-like Outer membrane protein                                   |      |            |
| CT681   | ompA   | 26486  | 1.8772277 | major outer membrane protein                                       |      | Midlate II |
| CT505   | gapA   | 22374  | 1.8710189 | glyceraldehyde-3-phosphate dehydrogenase                           |      | Midlate    |
| CT504   |        | 19186  | 1.8621851 | hypothetical protein                                               |      | Midlate    |
| CT671   |        | 19248  | 1.8448947 | hypothetical protein                                               |      | Midlate    |
| CT827   | nrdA   | 66934  | 1.8041895 | ribonucleotide-diphosphate reductase subunit alpha                 |      | Midlate    |
| CT709   | mreB   | 22827  | 1.7965789 | rod shape-determining protein MreB                                 |      | Midlate    |
| CT519   | rpsQ   | 5215   | 1.7934929 | 30S ribosomal protein S17                                          |      |            |

|         |        |       |           |                                                                     |            |
|---------|--------|-------|-----------|---------------------------------------------------------------------|------------|
| CT511   | rplO   | 8952  | 1.7781633 | 50S ribosomal protein L15                                           |            |
| CT626   | rpsD   | 13328 | 1.769718  | 30S ribosomal protein S4                                            |            |
| CT402   | lpxK   | 25131 | 1.758224  | tetraacyldisaccharide 4'-kinase                                     |            |
| CT708   |        | 73565 | 1.7512154 | SWF/SNF family helicase                                             | Midlate    |
| CT169   | trpR   | 5995  | 1.7440721 | Trp operon repressor                                                |            |
| CT771   |        | 8984  | 1.7423986 | hydrolase/phosphatase-like protein                                  |            |
| CT780   |        | 9902  | 1.7366949 | protein disulfide isomerase                                         | Late       |
| CT692   |        | 25736 | 1.735956  | inorganic phosphate transporter                                     |            |
| CT136   |        | 14582 | 1.7323721 | lysophospholipase esterase                                          |            |
| CT775   |        | 15346 | 1.7311383 | 1-acyl-sn-glycerol-3-phosphate acyltransferase                      | Late       |
| CT067   | ytgA   | 19285 | 1.7263126 | solute protein binding family                                       |            |
| CT381   | artJ   | 15481 | 1.7256006 | arginine binding protein                                            |            |
| CT523   | rplV   | 6267  | 1.678718  | 50S ribosomal protein L22                                           |            |
| CT539   | trxA   | 5950  | 1.6672268 | thioredoxin                                                         |            |
| CT849.1 |        | 3435  | 1.6661718 | hypothetical protein                                                |            |
| CT518   | rplN   | 7009  | 1.6647633 | 50S ribosomal protein L14                                           |            |
| CT359   |        | 10826 | 1.6335693 | hypothetical protein                                                |            |
| CT269   | murE   | 27455 | 1.6315372 | UDP-N-acetylmuramoylalanyl-D-glutamate--2, 6-diaminopimelate ligase |            |
| CT713   | porB   | 18682 | 1.6249335 | outer membrane protein B                                            | Midlate II |
| CT407   | dksA   | 7333  | 1.6126414 | dnaK suppressor protein                                             |            |
| CT828   | nrdB   | 19763 | 1.6079871 | ribonucleotide-diphosphate reductase subunit beta                   | Midlate    |
| CT668   |        | 12754 | 1.607224  | hypothetical protein                                                | Midlate    |
| CT318   | rplA   | 13557 | 1.599722  | 50S ribosomal protein L1                                            |            |
| CT065   |        | 31944 | 1.5940853 | ADP/ATP translocase                                                 | Early      |
| CT068   | ytgB_1 | 14494 | 1.5713382 | rRNA methylase                                                      |            |
| CT396   | dnaK   | 39262 | 1.5631737 | molecular chaperone DnaK                                            | Late       |
| CT097   | nusA   | 24379 | 1.5514612 | transcription elongation factor NusA                                |            |
| CT768   |        | 30374 | 1.5508332 | hypothetical protein                                                | Midlate    |
| CT513   | rplR   | 6587  | 1.5496041 | 50S ribosomal protein L18                                           |            |
| CT664   |        | 43145 | 1.5306274 | FHA domain-containing protein                                       | Midlate    |
| CT611   |        | 12728 | 1.5232445 | hypothetical protein                                                | Midlate    |
| CT491   | rho    | 24735 | 1.52082   | transcription termination factor Rho                                | Midlate II |
| CT656   |        | 5184  | 1.5200637 | hypothetical protein                                                |            |
| CT013   | cydA   | 23762 | 1.5193675 | cytochrome d ubiquinol oxidase subunit I                            | Midlate    |
| CT702   |        | 9089  | 1.5067171 | hypothetical protein                                                | Very late  |
| CT498   | gidA   | 32573 | 1.4899686 | tRNA uridine 5-carboxymethylaminomethyl modification enzyme         |            |
| CT520   | rpmC   | 3668  | 1.4659831 | GidA                                                                |            |
| CT800   | pth    | 9027  | 1.4655789 | 50S ribosomal protein L29                                           |            |
| CT544   | uhpC   | 22947 | 1.4611911 | peptidyl-tRNA hydrolase                                             |            |
| CT614   | folX   | 6459  | 1.458779  | hexosphosphate transport                                            | Midlate    |
| CT341   | dnaJ   | 19346 | 1.455396  | dihydroneopterin aldolase                                           |            |
| CT228   |        | 10010 | 1.4414367 | chaperone protein DnaJ                                              |            |
| CT424   | rsbV_1 | 5684  | 1.4408667 | hypothetical protein                                                | Early      |
| CT512   | rpsE   | 8292  | 1.4311387 | anti-sigma F factor antagonist                                      |            |
| CT554   | brnQ   | 20984 | 1.4190678 | 30S ribosomal protein S5                                            |            |
| CT241   | yaeT   | 40128 | 1.4146311 | branched chain amino acid ABC transporter carrier protein           |            |
| CT541   | mip    | 12354 | 1.4021371 | OMP85 family membrane protein                                       | Midlate    |
| CT516   | rplE   | 8744  | 1.3927382 | peptidyl-prolyl cis-trans isomerase                                 |            |
| CT584   |        | 8912  | 1.3746344 | 50S ribosomal protein L5                                            |            |
| CT527   | rplD   | 10483 | 1.3738614 | hypothetical protein                                                | Midlate    |
|         |        |       |           | 50S ribosomal protein L4                                            |            |



|        |      |       |           |                                                              |         |
|--------|------|-------|-----------|--------------------------------------------------------------|---------|
| CT419  | rpmA | 3704  | 1.3681151 | 50S ribosomal protein L27                                    |         |
| CT352  |      | 4852  | 1.3506071 | hypothetical protein                                         |         |
| CT386  |      | 13814 | 1.3446012 | metal dependent hydrolase                                    | Midlate |
| CT315  | rpoB | 62593 | 1.3394806 | DNA-directed RNA polymerase subunit beta                     |         |
| CT763  |      | 6707  | 1.33786   | hypothetical protein                                         |         |
| CT741  | yajC | 5403  | 1.3342188 | preprotein translocase subunit YajC                          |         |
| CT430  | dapF | 12769 | 1.3072251 | diaminopimelate epimerase                                    | Midlate |
| CT824  |      | 43965 | 1.3024114 | zinc metalloprotease                                         |         |
| CT537  | yjeE | 7033  | 1.2983311 | ATPase or kinase                                             |         |
| CT528  | rplC | 9377  | 1.2870041 | 50S ribosomal protein L3                                     |         |
| CT221  | yqfU | 13208 | 1.2866999 | hypothetical protein                                         |         |
| CT510  | secY | 20405 | 1.2790332 | preprotein translocase subunit SecY                          |         |
| CT561  | yscL | 9730  | 1.2751667 | type III secretion system protein                            | Midlate |
| CT002  | gatC | 4653  | 1.2667892 | aspartyl/glutamyl-tRNA amidotransferase subunit C            |         |
| CT385  | yctF | 4888  | 1.2636651 | Hit family hydrolase                                         | Midlate |
| CT028  | rplS | 5197  | 1.2635789 | 50S ribosomal protein L19                                    |         |
| CT517  | rplX | 4944  | 1.260762  | 50S ribosomal protein L24                                    |         |
| CT026  | rpsP | 4861  | 1.2550304 | 30S ribosomal protein S16                                    |         |
| CT296  |      | 6696  | 1.2533908 | hypothetical protein                                         |         |
| CT621  |      | 36663 | 1.2508202 | hypothetical protein                                         | Midlate |
| CT096  | infB | 40639 | 1.2503143 | translation initiation factor IF-2                           |         |
| CT788  |      | 7254  | 1.2441536 | leader (60) peptide-periplasmic                              |         |
| CT361  | dapA | 12236 | 1.242059  | dihydrodipicolinate synthase                                 |         |
| CT405  | ribC | 8550  | 1.2357354 | riboflavin synthase subunit alpha                            |         |
| CT701  | secA | 41278 | 1.2354756 | preprotein translocase subunit SecA                          | Midlate |
| CT600  | pal  | 8397  | 1.2331379 | peptidoglycan-associated lipoprotein                         | Midlate |
| CT180  | tauB | 10117 | 1.2311003 | nitrate/iron ABC transporter ATPase                          |         |
| CT177  | dsbG | 10154 | 1.2199798 | disulfide bond chaperone                                     |         |
| CT017  |      | 19053 | 1.2116205 | hypothetical protein                                         | Late    |
| CT859  | ispH | 13814 | 1.2067763 | 4-hydroxy-3-methylbut-2-enyl diphosphate reductase           |         |
| CT243  | lpxD | 15139 | 1.2063048 | UDP-3-O-[3-hydroxymyristoyl] glucosamine N-acyltransferase   |         |
| CT612  | folA | 6723  | 1.2057099 | dihydrofolate reductase                                      |         |
| CT406  | nrdR | 6677  | 1.1991416 | transcriptional regulator NrdR                               |         |
| CT678  | pyrH | 10330 | 1.1971297 | uridylyate kinase                                            |         |
| CT039  | dcd  | 8053  | 1.1968164 | deoxycytidine triphosphate deaminase                         |         |
| CT482  |      | 9093  | 1.19145   | hypothetical protein                                         |         |
| CT323  | infA | 3171  | 1.1861734 | translation initiation factor IF-1                           |         |
| CT041  |      | 10990 | 1.1817881 | hypothetical protein                                         | Late    |
| CT736  | ybcL | 6083  | 1.1795911 | hypothetical protein                                         |         |
| CT515  | rpsH | 5266  | 1.1688084 | 30S ribosomal protein S8                                     |         |
| CT514  | rplF | 7425  | 1.1655267 | 50S ribosomal protein L6                                     |         |
| CT351a | secG | 4203  | 1.1609324 | preprotein translocase subunit SecG                          |         |
| CT275  | dnaA | 18449 | 1.1588853 | chromosomal replication initiation protein                   |         |
| CT858  |      | 25646 | 1.146175  | protease                                                     |         |
| CT353  | def  | 7131  | 1.1425044 | peptide deformylase                                          |         |
| CT550  |      | 5688  | 1.1359986 | hypothetical protein                                         | Midlate |
| CT672  | fliN | 15008 | 1.1273801 | type III secretion system protein                            | Midlate |
|        |      |       |           | chromosome partitioning ATPase-CHLTR plasmid protein homolog |         |
| CT582  | minD | 9935  | 1.1060616 | GP5D                                                         |         |
| CT522  | rpsC | 8196  | 1.0991597 | 30S ribosomal protein S3                                     |         |
| CT321  | secE | 3168  | 1.0987296 | preprotein translocase subunit SecE                          |         |
| CT364  | dapB | 9725  | 1.0956429 | dihydrodipicolinate reductase                                |         |

|       |        |       |           |                                                                        |       |            |
|-------|--------|-------|-----------|------------------------------------------------------------------------|-------|------------|
| CT670 |        | 6527  | 1.0825593 | hypothetical protein                                                   |       | Midlate    |
| CT031 |        | 3872  | 1.0804687 | hypothetical protein                                                   |       |            |
| CT543 | hisS   | 15751 | 1.0767884 | histidyl-tRNA synthetase                                               |       |            |
| CT012 | ybbP   | 9956  | 1.0632189 | hypothetical protein                                                   |       |            |
| CT294 | sodM   | 7590  | 1.0585806 | superoxide dismutase                                                   |       |            |
| CT533 | lpxC   | 10731 | 1.0577092 | UDP-3-O-[3-hydroxymyristoyl] N-acetylglucosamine deacetylase           |       |            |
| CT094 | truB   | 8753  | 1.0539123 | tRNA pseudouridine synthase B                                          |       |            |
| CT253 |        | 8157  | 1.041969  | hypothetical protein                                                   |       |            |
| CT046 | hctB   | 8006  | 1.0412061 | histone-like protein 2                                                 | Late  | Late       |
| CT069 | ytgC   | 16666 | 1.0305912 | integral membrane protein                                              |       |            |
| CT090 | lcrD   | 26550 | 1.0293166 | low calcium response D                                                 |       | Midlate    |
|       |        |       |           | Yop proteins translocation protein C/general secretion pathway protein |       |            |
| CT674 | yscC   | 34454 | 1.024511  | protein                                                                |       | Midlate II |
| CT320 | nusG   | 6491  | 1.0224418 | transcription antitermination protein NusG                             |       |            |
| CT070 | ytgD   | 11759 | 1.0208357 | integral membrane protein                                              |       |            |
| CT291 | ptsN_2 | 5515  | 1.0153351 | PTS IIA protein                                                        |       |            |
| CT535 | yciA   | 5518  | 1.0032389 | acyl-CoA hydrolase                                                     |       | Midlate    |
| CT044 | ssb    | 5479  | 0.9904083 | single-stranded DNA-binding protein                                    |       |            |
| CT327 | trpC   | 7187  | 0.9840054 | N-(5'-phosphoribosyl)anthranilate isomerase                            |       |            |
| CT476 |        | 11122 | 0.9823909 | hypothetical protein                                                   |       | Midlate    |
| CT821 | sucC   | 12691 | 0.9762476 | succinyl-CoA synthetase subunit beta                                   |       |            |
|       |        |       |           | tRNA (guanine-N(1)-)-methyltransferase/unknown domain fusion protein   |       |            |
| CT027 | trmD   | 11482 | 0.96954   | protein                                                                |       |            |
| CT502 | ruvC   | 5580  | 0.9694396 | Holliday junction resolvase                                            |       |            |
| CT557 | lpdA   | 15592 | 0.9681899 | dihydrolipoamide dehydrogenase                                         |       |            |
| CT251 |        | 26994 | 0.9536828 | putative inner membrane protein translocase component YidC             |       |            |
| CT540 | yibK   | 5075  | 0.9465289 | rRNA methylase                                                         |       |            |
| CT532 | fabZ   | 5043  | 0.9388933 | (3R)-hydroxymyristoyl-ACP dehydratase                                  |       |            |
| CT521 | rplP   | 4418  | 0.9382922 | 50S ribosomal protein L16                                              |       |            |
| CT268 | amiA   | 8178  | 0.9377575 | N-acetylmuramoyl-L-alanine amidase                                     |       |            |
| CT362 | lysC   | 13835 | 0.9376548 | aspartate kinase                                                       |       |            |
| CT189 | gyrA_1 | 28606 | 0.9348411 | DNA gyrase subunit A                                                   |       |            |
| CT282 | gcsH   | 3820  | 0.9194834 | glycine cleavage system protein H                                      |       |            |
| CT273 |        | 6007  | 0.9185747 | hypothetical protein                                                   |       | Midlate    |
| CT700 |        | 15172 | 0.9137172 | hypothetical protein                                                   |       | Midlate    |
| CT872 | pmpH   | 33051 | 0.912142  | polymorphic outer membrane protein                                     | Late  | Midlate    |
| CT295 | mrsA_1 | 19168 | 0.9095698 | phosphoglucomutase                                                     |       |            |
| CT354 | ksgA   | 8424  | 0.9040696 | dimethyladenosine transferase                                          |       |            |
| CT740 | dmpP   | 13855 | 0.9024917 | Na( )-translocating NADH-quinone reductase subunit F                   |       |            |
| CT266 |        | 12514 | 0.8951058 | hypothetical protein                                                   |       |            |
| CT836 | pheS   | 10563 | 0.8913559 | phenylalanyl-tRNA synthetase subunit alpha                             |       |            |
| CT218 | surE   | 8721  | 0.8879608 | stationary phase survival protein SurE                                 |       | Midlate    |
| CT669 | yscN   | 13889 | 0.8864376 | type III secretion system ATPase                                       |       | Midlate    |
| CT461 | yael   | 9943  | 0.8823883 | phosphohydrolase                                                       |       |            |
| CT278 | nqr2   | 15927 | 0.868281  | Na( )-translocating NADH-quinone reductase subunit B                   |       | Midlate    |
| CT142 |        | 8598  | 0.867902  | hypothetical protein                                                   |       | Midlate II |
| CT563 | yscS   | 2881  | 0.8626409 | Yop proteins translocation protein S                                   |       |            |
| CT480 | oppA_4 | 20784 | 0.8541989 | oligopeptide binding lipoprotein                                       | Early | Midlate    |
| CT728 |        | 7705  | 0.8515256 | hypothetical protein                                                   |       |            |
| CT618 |        | 7634  | 0.850625  | hypothetical protein                                                   |       | Midlate    |
| CT823 | htrA   | 14896 | 0.8489177 | DO Serine protease                                                     |       |            |
| CT029 | rnhB   | 6397  | 0.8433331 | ribonuclease HII                                                       |       |            |

|         |        |       |           |                                                            |       |            |
|---------|--------|-------|-----------|------------------------------------------------------------|-------|------------|
| CT395   | grpE   | 5975  | 0.8398377 | HSP-70 cofactor                                            |       | Late       |
| CT283   |        | 20733 | 0.8392204 | hypothetical protein                                       |       |            |
| CT531   | lpxA   | 8592  | 0.8391524 | UDP-N-acetylglucosamine acyltransferase                    |       | Midlate    |
| CT841   | ftsH   | 27925 | 0.8387935 | ATP-dependent zinc protease                                |       | Late       |
| CT759   | nlpD   | 7179  | 0.8331568 | muramidase                                                 |       |            |
| CT652.1 |        | 1788  | 0.8330283 | hypothetical protein                                       |       |            |
| CT457   | yebC   | 6588  | 0.8321948 | hypothetical protein                                       |       | Late       |
| CT675   | karG   | 10730 | 0.8303431 | ATP:guanido phosphotransferase                             |       |            |
| CT710   | pckA   | 15918 | 0.8270178 | phosphoenolpyruvate carboxykinase                          |       | Midlate    |
| CT071   | yaeM   | 10984 | 0.8255771 | 1-deoxy-D-xylulose 5-phosphate reductoisomerase            |       |            |
| CT587   | eno    | 12754 | 0.8210394 | phosphopyruvate hydratase                                  |       |            |
| CT117   |        | 2974  | 0.8148149 | inclusion membrane protein F                               | Early |            |
| CT832   | nusB   | 4738  | 0.8066813 | transcription antitermination protein NusB                 |       |            |
| CT376   | mdhC   | 9064  | 0.8018162 | malate dehydrogenase                                       | Early | Midlate    |
| CT585   | trpS   | 9791  | 0.8008935 | tryptophanyl-tRNA synthetase                               |       |            |
| CT014   | cydB   | 10078 | 0.8007174 | cytochrome d ubiquinol oxidase subunit II                  |       | Midlate    |
| CT773   | ldh    | 9443  | 0.800319  | leucine dehydrogenase                                      |       |            |
| CT025   | ffh    | 12260 | 0.7985362 | signal recognition particle, subunit FFH/SRP54             |       |            |
| CT397   | vacB   | 18971 | 0.7968309 | exoribonuclease II                                         |       |            |
| CT486   | fliY   | 7469  | 0.7947251 | glutamine-binding protein                                  |       |            |
| CT542   | aspS   | 15770 | 0.7903122 | aspartyl-tRNA synthetase                                   |       |            |
| CT875   |        | 11136 | 0.7901522 | hypothetical protein                                       |       | Late       |
| CT286   | clpC   | 25165 | 0.7893601 | ClpC protease ATPase                                       |       | Midlate II |
| CT378   | pgi    | 14454 | 0.7854645 | glucose-6-phosphate isomerase                              |       | Midlate    |
| CT601   | papQ   | 5643  | 0.7845385 | invasin repeat-containing phosphatase                      |       |            |
| CT795   |        | 4731  | 0.7844806 | hypothetical protein                                       | Early |            |
| CT349   | maf    | 5394  | 0.782514  | Maf-like protein                                           |       |            |
| CT871   | pmpG   | 27645 | 0.7725738 | polymorphic outer membrane protein                         |       | Midlate    |
| CT330   |        | 2448  | 0.7701522 | hypothetical protein                                       |       |            |
| CT113   | clpB   | 23628 | 0.7697211 | Clp protease ATPase                                        |       |            |
| CT606.1 |        | 2022  | 0.7680308 | hypothetical protein                                       |       |            |
| CT536   | dnaQ_2 | 6877  | 0.755695  | DNA polymerase III subunit epsilon                         |       |            |
| CT215   | dhnA   | 9436  | 0.7493686 | fructose-bisphosphate aldolase                             |       | Midlate    |
| CT401   | gltT   | 10188 | 0.7492583 | glutamate symport                                          |       |            |
| CT023   | prfA   | 9631  | 0.7473857 | peptide chain release factor 1                             |       |            |
| CT265   | accA   | 8748  | 0.7431151 | acetyl-CoA carboxylase carboxyltransferase subunit alpha   |       |            |
| CT404   |        | 7043  | 0.7423473 | N6-adenine-specific DNA methylase                          |       |            |
| CT776   | aas    | 13814 | 0.7354244 | long chain fatty acid--[acyl-carrier-protein] ligase       |       | Late       |
| CT849   |        | 3954  | 0.7340779 | hypothetical protein                                       |       |            |
| CT422   |        | 4102  | 0.7297329 | metalloenzyme                                              |       |            |
| CT625   | nfo    | 7106  | 0.7290546 | endonuclease IV                                            |       |            |
| CT122   | efp_1  | 4787  | 0.7276601 | elongation factor P                                        |       |            |
| CT630   | cpxR   | 5609  | 0.7228291 | HTH transcriptional regulatory protein and receiver domain |       |            |
| CT657   |        | 2761  | 0.72082   | hypothetical protein                                       |       |            |
| CT750   | tktB   | 16109 | 0.7170629 | transketolase                                              |       |            |
| CT733   |        | 11091 | 0.7126125 | hypothetical protein                                       |       | Late       |
| CT072   | yaeL   | 15073 | 0.7059336 | metalloprotease                                            |       |            |
| CT239   | fabH   | 7402  | 0.7006368 | 3-oxoacyl-(acyl carrier protein) synthase III              |       | Midlate    |
| CT455   | murA   | 10427 | 0.6933554 | UDP-N-acetylglucosamine 1-carboxyvinyltransferase          |       | Midlate    |
| CT344   | lon    | 19769 | 0.6918818 | ATP-dependent protease La                                  |       | Midlate    |
| CT421   |        | 5722  | 0.6909607 | hypothetical protein                                       |       |            |
| CT479   | oppB_2 | 12021 | 0.6888977 | oligopeptide permease                                      |       |            |

|         |           |       |           |                                                                    |            |
|---------|-----------|-------|-----------|--------------------------------------------------------------------|------------|
| CT237   | fabG      | 5803  | 0.6870492 | 3-ketoacyl-(acyl-carrier-protein) reductase                        | Midlate    |
| CT003   | gatA      | 12398 | 0.6869712 | aspartyl/glutamyl-tRNA amidotransferase subunit A                  |            |
| CT822   | sucD      | 6586  | 0.6836571 | succinyl-CoA synthetase subunit alpha                              |            |
| CT212   |           | 3573  | 0.6834509 | hypothetical protein                                               | Late       |
| CT797   | pgsA_2    | 4700  | 0.6830251 | CDP-diacylglycerol--glycerol-3-phosphate 3-phosphatidyltransferase |            |
| CT260   |           | 4034  | 0.6735139 | hypothetical protein                                               |            |
| CT627   | yceA      | 8230  | 0.6725201 | hypothetical protein                                               |            |
| CT190   | gyrB      | 19288 | 0.6690327 | DNA gyrase subunit B                                               |            |
| CT053   |           | 3555  | 0.6679867 | hypothetical protein                                               | Midlate    |
| CT116   |           | 3172  | 0.6639256 | inclusion membrane protein E                                       | Early      |
| CT030   | gmk       | 4928  | 0.6615267 | guanylate kinase                                                   |            |
| CT432   | glyA      | 11340 | 0.6573544 | serine hydroxymethyltransferase                                    | Midlate    |
| CT804   | ychB      | 6647  | 0.6563911 | 4-diphosphocytidyl-2-C-methyl-D-erythritol kinase                  |            |
| CT303   |           | 3980  | 0.6560009 | hypothetical protein                                               |            |
| CT654   |           | 3709  | 0.6558302 | hypothetical protein                                               |            |
| CT408   | lspA      | 3720  | 0.6512336 | lipoprotein signal peptidase                                       | Midlate    |
| CT560   |           | 6169  | 0.6500661 | hypothetical protein                                               |            |
| CT185   | zwf       | 11936 | 0.6426318 | glucose-6-phosphate 1-dehydrogenase                                |            |
| CT358   |           | 3829  | 0.6343157 | hypothetical protein                                               |            |
| CT704   | pcnB_2    | 9144  | 0.6329503 | polyA polymerase                                                   |            |
| CT735   | dagA_2    | 9486  | 0.6305126 | Na( )-linked D-alanine glycine permease                            | Early      |
| CT623   |           | 10090 | 0.628459  | hypothetical protein                                               |            |
| CT276   |           | 4132  | 0.6281464 | hypothetical protein                                               |            |
| CT004   | gatB      | 11233 | 0.6269354 | aspartyl/glutamyl-tRNA amidotransferase subunit B                  |            |
| CT820   | ftsY      | 6232  | 0.6266811 | cell division protein FtsY                                         |            |
| CT758   | murD      | 9220  | 0.6240406 | UDP-N-acetylmuramoyl-L-alanyl-D-glutamate synthetase               |            |
| CT089   | lcrE      | 9325  | 0.6221447 | low calcium response E                                             | Midlate    |
| CT363   | asd       | 7327  | 0.6218461 | aspartate-semialdehyde dehydrogenase                               |            |
| CT448   | secD/secF | 30554 | 0.6211635 | bifunctional preprotein translocase subunit SecD/SecF              |            |
| CT399   | yrbH      | 7129  | 0.6210097 | GutQ/KpsF family sugar-P isomerase                                 |            |
| CT326.2 |           | 1309  | 0.6200574 | hypothetical protein                                               |            |
| CT445   | gltX      | 11370 | 0.6196809 | glutamyl-tRNA synthetase                                           |            |
| CT290   | ptsN_1    | 4700  | 0.6191686 | PTS IIA protein HTH DNA-binding domain                             |            |
| CT403   | yjfh      | 5672  | 0.6174237 | rRNA methylase                                                     |            |
| CT413   | pmpB      | 37899 | 0.6159743 | putative outer membrane protein B                                  | Midlate    |
| CT304   | atpK      | 3006  | 0.6126116 | V-type ATP synthase subunit K                                      |            |
| CT040   | ruvB      | 6919  | 0.6120047 | Holliday junction DNA helicase RuvB                                | Late       |
| CT634   |           | 9651  | 0.6039711 | Na( )-translocating NADH-quinone reductase subunit A               | Midlate    |
| CT137   | ywlC      | 5839  | 0.6024462 | SuA5 superfamily-related protein                                   |            |
| CT075   | dnaN      | 9062  | 0.60223   | DNA polymerase III subunit beta                                    |            |
| CT216   | xasA      | 10208 | 0.5956258 | glutamate/gamma-aminobutyrate antiporter                           | Midlate    |
| CT332   | pykF      | 9902  | 0.5916113 | pyruvate kinase                                                    |            |
| CT281   | nqr5      | 5145  | 0.5910161 | Na( )-translocating NADH-quinone reductase subunit E               |            |
| CT337   | ptsH      | 2274  | 0.5882068 | phosphocarrier protein HPr                                         |            |
| CT143   |           | 5720  | 0.5873744 | hypothetical protein                                               | Midlate II |
| CT271   |           | 1849  | 0.5865432 | hypothetical protein                                               |            |
| CT311   |           | 4748  | 0.583206  | hypothetical protein                                               |            |
| CT310   | atpE      | 4234  | 0.5830783 | V-type ATP synthase subunit E                                      |            |
| CT091   | yscU      | 7200  | 0.582205  | type III secretion system protein                                  |            |
| CT583   | gp6D      | 5289  | 0.5820642 | virulence plasmid protein pGP6-D-related protein                   |            |
| CT608   | uvrD      | 13326 | 0.5814687 | DNA helicase                                                       |            |

|       |           |       |           |                                                                |         |
|-------|-----------|-------|-----------|----------------------------------------------------------------|---------|
| CT631 |           | 1607  | 0.5692171 | hypothetical protein                                           |         |
| CT808 | cafE      | 10571 | 0.5691118 | ribonuclease E                                                 |         |
| CT811 | plsX      | 6551  | 0.5675709 | putative glycerol-3-phosphate acyltransferase PlsX             |         |
| CT816 | glmS      | 12201 | 0.564756  | glucosamine--fructose-6-phosphate aminotransferase             | Midlate |
| CT719 | fliF      | 6217  | 0.5641287 | type III secretion system protein                              |         |
| CT409 |           | 8768  | 0.557485  | amino acid permease                                            |         |
| CT032 | metG      | 11386 | 0.5563218 | methionyl-tRNA synthetase                                      |         |
| CT045 | pepA      | 9917  | 0.5562577 | leucyl aminopeptidase                                          | Midlate |
| CT178 |           | 7697  | 0.5548816 | hypothetical protein                                           |         |
| CT615 | rpoD      | 11485 | 0.5513154 | RNA polymerase sigma factor                                    |         |
| CT869 | pmpE      | 19054 | 0.5502338 | polymorphic outer membrane protein                             | Late    |
| CT428 | ubiE      | 4407  | 0.5484824 | ubiquinone/menaquinone biosynthesis methyltransferase          |         |
| CT261 | dnaQ_1    | 4434  | 0.5477207 | DNA polymerase III subunit epsilon                             |         |
| CT123 | accB      | 3185  | 0.545436  | acetyl-CoA carboxylase biotin carboxyl carrier protein subunit |         |
| CT151 |           | 9724  | 0.5444222 | hypothetical protein                                           |         |
| CT466 |           | 2039  | 0.5442333 | hypothetical protein                                           |         |
| CT102 |           | 2958  | 0.5439093 | hypothetical protein                                           |         |
| CT729 | serS      | 8144  | 0.5378491 | seryl-tRNA synthetase                                          |         |
| CT373 |           | 3764  | 0.5377769 | hypothetical protein                                           | Midlate |
| CT866 | glgB      | 13654 | 0.5363302 | glycogen branching enzyme                                      |         |
|       |           |       |           | bifunctional 3,4-dihydroxy-2-butanone 4-phosphate synthase/GTP |         |
| CT731 | ribA/ribB | 7970  | 0.5349674 | cyclohydrolase II protein                                      |         |
| CT690 | dppD      | 5900  | 0.5337531 | peptide ABC transporter ATPase                                 |         |
| CT099 | trxB      | 6736  | 0.5329169 | thioredoxin reductase                                          |         |
| CT853 |           | 3792  | 0.5274442 | hypothetical protein                                           |         |
| CT530 | fmt       | 5952  | 0.5266046 | methionyl-tRNA formyltransferase                               |         |
| CT011 |           | 7988  | 0.5262418 | hypothetical protein                                           |         |
| CT464 |           | 4090  | 0.5223911 | hydrolase, haloacid dehalogenase-like family                   |         |
| CT696 |           | 7234  | 0.5221324 | hypothetical protein                                           |         |
| CT287 | mnmA      | 6673  | 0.5199122 | tRNA-specific 2-thiouridylase MnmA                             |         |
| CT293 | accD      | 5608  | 0.5186432 | acetyl-CoA carboxylase subunit beta                            |         |
| CT629 | glmU      | 3734  | 0.5146657 | glucosamine-1-phosphate acetyltransferase                      |         |
| CT643 | topA      | 15566 | 0.5110588 | DNA topoisomerase I/SWI domain fusion protein                  | Late    |
| CT490 |           | 1539  | 0.5073052 | hypothetical protein                                           |         |
| CT280 | nqr4      | 3945  | 0.5060098 | Na( )-translocating NADH-quinone reductase subunit D           |         |
| CT188 | tmk       | 3578  | 0.5021614 | thymidylate kinase                                             |         |
| CT062 | tyrS      | 6979  | 0.4995997 | tyrosyl-tRNA synthetase                                        | Midlate |
| CT752 | efp_2     | 3221  | 0.4992798 | elongation factor P                                            | Midlate |
| CT478 | oppC_2    | 10244 | 0.4952013 | oligopeptide permease                                          |         |
| CT121 | araD      | 3978  | 0.4908316 | ribulose-phosphate 3-epimerase                                 |         |
| CT632 |           | 9227  | 0.4904951 | hypothetical protein                                           |         |
| CT186 | devB      | 4473  | 0.4896205 | 6-phosphogluconolactonase                                      |         |
| CT606 | yggV      | 3508  | 0.4891117 | putative deoxyribonucleotide triphosphate pyrophosphatase      |         |
| CT124 | accC      | 7786  | 0.4888949 | acetyl-CoA carboxylase biotin carboxylase subunit              |         |
| CT737 |           | 3663  | 0.4883873 | SET domain containing protein                                  |         |
| CT772 | ppa       | 3731  | 0.4847587 | inorganic pyrophosphatase                                      |         |
| CT179 |           | 2938  | 0.4809041 | hypothetical protein                                           |         |
| CT658 | sfhB      | 5562  | 0.4805112 | ribosomal large subunit pseudouridine synthase D               |         |
| CT447 | recJ      | 9659  | 0.4798463 | ssDNA exonuclease                                              |         |
| CT388 |           | 1594  | 0.4790909 | hypothetical protein                                           |         |
| CT064 | lepA      | 10142 | 0.4775047 | GTP-binding protein LepA                                       |         |
| CT191 |           | 1970  | 0.4753534 | hypothetical protein                                           |         |

|         |           |       |           |                                                                  |       |            |
|---------|-----------|-------|-----------|------------------------------------------------------------------|-------|------------|
| CT328   | tpiA      | 4418  | 0.4726208 | triosephosphate isomerase                                        |       | Midlate    |
| CT112   | pepF      | 10253 | 0.4707544 | oligoendopeptidase F                                             |       |            |
| CT248   | glgP      | 13521 | 0.4689512 | glycogen phosphorylase                                           |       | Late       |
| CT223   |           | 4651  | 0.4679806 | hypothetical protein                                             |       |            |
| CT568   |           | 2448  | 0.4665883 | hypothetical protein                                             |       |            |
| CT501   | ruvA      | 3233  | 0.46638   | Holliday junction DNA helicase RuvA                              |       |            |
| CT712   |           | 6330  | 0.4645087 | hypothetical protein                                             | Late  | Late       |
| CT683   |           | 5259  | 0.4637615 | TPR-motif-containing protein                                     |       |            |
| CT781   | lysS      | 8514  | 0.4616821 | lysyl-tRNA synthetase                                            |       |            |
| CT727   | zntA      | 11052 | 0.461189  | metal transport P-type ATPase                                    |       |            |
| CT141   | secA_1    | 2429  | 0.4596886 | protein translocase                                              |       |            |
| CT176   | dsbB      | 2209  | 0.4520519 | putative disulfide oxidoreductase                                |       |            |
|         |           |       |           | bifunctional D-alanyl-alanine synthetase A/UDP-N-acetylmuramate- |       |            |
| CT762   | murC/ddlA | 12791 | 0.4501852 | -L-alanine ligase                                                |       |            |
| CT274   |           | 2063  | 0.4459109 | hypothetical protein                                             |       |            |
| CT569   |           | 1675  | 0.4441434 | general secretion pathway protein G                              |       |            |
| CT558   | lipA      | 4656  | 0.4407191 | lipoyl synthase                                                  |       |            |
| CT254   |           | 4008  | 0.4405389 | hypothetical protein                                             |       |            |
| CT104   | fabI      | 4672  | 0.4353836 | enoyl-(acyl carrier protein) reductase                           |       |            |
| CT777   | bioF      | 5756  | 0.4349837 | 8-amino-7-oxononanoate synthase                                  |       |            |
| CT182   | kdsB      | 3946  | 0.4334897 | 3-deoxy-manno-octulosonate cytidyltransferase                    |       |            |
| CT435   | cysJ      | 5373  | 0.4323888 | sulfite reductase                                                |       |            |
| CT562   | yscR      | 4425  | 0.4295247 | type III secretion system protein                                |       |            |
| CT343   |           | 3159  | 0.4254714 | O-sialoglycoprotein endopeptidase family protein                 |       |            |
| CT144   |           | 4163  | 0.4233208 | hypothetical protein                                             |       | Midlate II |
| CT753   |           | 1123  | 0.4228033 | hypothetical protein                                             |       |            |
| CT380   | phnP      | 3927  | 0.4219895 | metal-dependent hydrolase                                        |       |            |
| CT564   | yyscT     | 4372  | 0.420643  | Yop proteins translocation protein T                             |       |            |
| CT864   | xerD      | 4363  | 0.4196691 | site-specific tyrosine recombinase XerD                          |       | Late       |
| CT689   | dppF      | 3841  | 0.4170842 | peptide ABC transporter ATPase                                   |       |            |
| CT870   | pmpF      | 14606 | 0.4168276 | polymorphic outer membrane protein                               |       | Midlate    |
| CT451   | cdsA      | 4619  | 0.4164956 | phosphatidate cytidyltransferase                                 |       |            |
| CT494   | sohB      | 4843  | 0.4159425 | protease                                                         |       | Midlate II |
| CT749   | alaS      | 13424 | 0.4141237 | alanyl-tRNA synthetase                                           |       |            |
| CT211   |           | 2727  | 0.4138184 | hypothetical protein                                             |       |            |
| CT576   | lcrH_1    | 3385  | 0.4119391 | low calcium response protein H                                   | Late  | Late       |
| CT874   | pmpI      | 13112 | 0.4118268 | polymorphic outer membrane protein                               |       | Midlate    |
| CT471   |           | 2844  | 0.4086567 | hypothetical protein                                             |       |            |
| CT375   |           | 4934  | 0.4086315 | D-amino acid dehydrogenase                                       | Early | Late       |
| CT187   | dnaX_1    | 4041  | 0.4073285 | DNA polymerase III subunit delta'                                |       |            |
| CT485   | hemH      | 4536  | 0.4070157 | ferrochelataase                                                  |       |            |
| CT444.1 |           | 1000  | 0.4057652 | hypothetical protein                                             |       |            |
| CT128   | adk       | 3483  | 0.4052732 | adenylate kinase                                                 |       |            |
| CT225   |           | 1733  | 0.4034372 | hypothetical protein                                             |       |            |
| CT462   | ispD      | 2997  | 0.4030244 | 2-C-methyl-D-erythritol 4-phosphate cytidyltransferase           |       |            |
| CT073   |           | 4720  | 0.4026073 | OMP [leader (19) peptide]                                        |       | Late       |
| CT581   | thrS      | 9116  | 0.4025994 | threonyl-tRNA synthetase                                         |       |            |
| CT203   |           | 3498  | 0.4021381 | hypothetical protein                                             |       |            |
| CT007   |           | 4582  | 0.4012493 | hypothetical protein                                             |       |            |
| CT817   | tyrP_1    | 5601  | 0.4012117 | tyrosine transporter                                             |       |            |
| CT452   | cmk       | 3001  | 0.4008297 | cytidylate kinase                                                |       |            |
| CT016   |           | 3159  | 0.4004206 | hypothetical protein                                             |       | Late       |

|         |        |       |           |                                                                                 |         |
|---------|--------|-------|-----------|---------------------------------------------------------------------------------|---------|
| CT599   | tolB   | 5863  | 0.4000129 | translocation protein TolB                                                      |         |
| CT410   | pcnB_1 | 5799  | 0.400008  | polyA polymerase                                                                |         |
| CT210   | hemL   | 5828  | 0.399743  | glutamate-1-semialdehyde aminotransferase                                       |         |
| CT551   | dacC   | 4778  | 0.3996084 | D-alanyl-D-alanine carboxypeptidase                                             |         |
| CT377   | ltuA   | 614   | 0.3989196 | late transcription unit A protein                                               | Midlate |
| CT547   |        | 4159  | 0.398025  | hypothetical protein                                                            |         |
| CT393   | proS   | 8323  | 0.3958995 | prolyl-tRNA synthetase                                                          |         |
| CT264   | msbA   | 9109  | 0.3940785 | transport ATP binding protein                                                   |         |
| CT628   | ispA   | 4074  | 0.3940433 | dimethylallyltransferase                                                        |         |
| CT114   |        | 6638  | 0.3921833 | hypothetical protein                                                            |         |
| CT722   | pgm    | 3035  | 0.3903935 | phosphoglyceromutase                                                            |         |
| CT636   | greA   | 9807  | 0.3873291 | transcript cleavage factor/unknown domain fusion protein                        |         |
| CT453   | plsC   | 2853  | 0.3854495 | 1-acyl-sn-glycerol-3-phosphate acyltransferase                                  |         |
| CT306   | atpD   | 2924  | 0.3806123 | V-type ATP synthase subunit D                                                   |         |
| CT250   | dnaA   | 6120  | 0.3801993 | chromosomal replication initiation protein                                      |         |
| CT814.1 |        | 1653  | 0.3796641 | hypothetical protein                                                            | Late    |
|         |        |       |           | N5-glutamine S-adenosyl-L-methionine-dependent methyltransferase                |         |
| CT024   |        | 3734  | 0.376916  |                                                                                 |         |
| CT660   | gyrA_2 | 6577  | 0.3768013 | DNA topoisomerase IV subunit A                                                  | Late    |
| CT103   |        | 4060  | 0.3756602 | HAD family phosphatase/phosphatase                                              | Late    |
| CT038   |        | 1543  | 0.3752529 | hypothetical protein                                                            |         |
| CT653   | yhbG   | 3182  | 0.3750792 | ABC transporter ATP-binding protein                                             |         |
| CT850   |        | 5112  | 0.3742739 | hypothetical protein                                                            | Early   |
| CT425   |        | 8319  | 0.3739003 | hypothetical protein                                                            |         |
| CT372   |        | 5365  | 0.3736488 | hypothetical protein                                                            |         |
| CT546   |        | 4054  | 0.3732836 | hypothetical protein                                                            | Late    |
| CT829   | trmB   | 2955  | 0.3706048 | tRNA (guanine-N(7)-)-methyltransferase                                          | Midlate |
| CT549   | rsbW   | 1991  | 0.370141  | sigma regulatory factor-histidine kinase                                        | Late    |
| CT641   | ygeD   | 7251  | 0.3700856 | efflux protein                                                                  |         |
| CT279   | nqr3   | 4236  | 0.3698926 | Na( )-translocating NADH-quinone reductase subunit C                            |         |
| CT446   | euo    | 2326  | 0.3685475 | hypothetical protein                                                            | Early   |
| CT034   | ytfF   | 4331  | 0.3680107 | cationic amino acid transporter                                                 |         |
| CT673   | pkn5   | 6368  | 0.3672972 | S/T protein kinase                                                              |         |
| CT812   | pmpD   | 19558 | 0.3649884 | polymorphic outer membrane protein                                              |         |
| CT574   | pepP   | 4676  | 0.3645196 | aminopeptidase P                                                                |         |
| CT019   | ileS   | 13259 | 0.3629205 | isoleucyl-tRNA synthetase                                                       |         |
| CT118   |        | 2223  | 0.3614338 | inclusion membrane protein G                                                    | Early   |
| CT009   | yfgA   | 1764  | 0.3581835 | HTH transcriptional regulator                                                   |         |
| CT782   | cysS   | 6272  | 0.3578625 | cysteinyl-tRNA synthetase                                                       |         |
| CT434   | ispF   | 2150  | 0.3545767 | 2-C-methyl-D-erythritol 2,4-cyclodiphosphate synthase                           |         |
| CT245   | pdhA   | 4311  | 0.3506622 | pyruvate dehydrogenase E1 component alpha subunit                               |         |
| CT450   | yaeS   | 3110  | 0.3491009 | undecaprenyl pyrophosphate synthase                                             |         |
| CT207   | pfkA_2 | 6946  | 0.3483596 | diphosphate--fructose-6-phosphate 1-phosphotransferase                          |         |
| CT414   | pmpC   | 22572 | 0.3471195 | putative outer membrane protein C                                               | Midlate |
| CT357   |        | 1284  | 0.3460634 | hypothetical protein                                                            |         |
| CT307   | atpB   | 5524  | 0.3459628 | V-type ATP synthase subunit B                                                   |         |
| CT145   |        | 7356  | 0.3444141 | Serine/threonine protein kinase                                                 |         |
| CT272   | mraW   | 3662  | 0.3439276 | S-adenosyl-methyltransferase MraW                                               |         |
| CT693   | pgk    | 4542  | 0.3431838 | phosphoglycerate kinase                                                         | Late    |
| CT789   |        | 996   | 0.3428773 | hypothetical protein                                                            |         |
|         |        |       |           | undecaprenyldiphospho-muramoylpentapeptide beta-N-acetylglucosaminyltransferase |         |
| CT761   | murG   | 4017  | 0.3405911 |                                                                                 |         |

|       |        |       |           |                                                         |      |         |
|-------|--------|-------|-----------|---------------------------------------------------------|------|---------|
| CT760 | ftsW   | 4357  | 0.3398325 | cell division protein FtsW                              |      |         |
| CT100 | acpS   | 1397  | 0.3395732 | 4'-phosphopantetheinyl transferase                      |      |         |
| CT596 | exbB   | 2754  | 0.3369491 | polysaccharide transporter                              |      |         |
| CT238 | fabD   | 3389  | 0.3366875 | acyl-carrier-protein S-malonyltransferase               |      | Midlate |
| CT336 | ptsI   | 6533  | 0.3361421 | phosphoenolpyruvate-protein phosphotransferase          |      |         |
| CT302 | valS   | 10741 | 0.3344971 | valyl-tRNA synthetase                                   |      |         |
| CT865 |        | 3770  | 0.3301376 | hypothetical protein                                    |      |         |
| CT477 | ada    | 2007  | 0.3288016 | methylated-DNA protein - cysteine methyltransferase     |      |         |
| CT751 | amn    | 3127  | 0.3223967 | AMP nucleosidase                                        |      |         |
| CT697 | nth    | 2193  | 0.3217049 | endonuclease III                                        |      |         |
| CT825 |        | 4751  | 0.3214358 | hypothetical protein                                    |      |         |
| CT056 |        | 2667  | 0.3208982 | hypothetical protein                                    |      |         |
| CT637 | tyrB   | 4550  | 0.3202653 | aromatic amino acid aminotransferase                    |      |         |
| CT499 | lplA_2 | 2712  | 0.32025   | lipoate-protein ligase A                                |      |         |
| CT493 | polA   | 9657  | 0.3196767 | DNA polymerase I                                        |      | Late    |
| CT258 | yhfO   | 4191  | 0.3191975 | NifS family pyridoxal phosphate-dependent protein       |      |         |
| CT134 |        | 1609  | 0.3189933 | hypothetical protein                                    |      |         |
| CT579 |        | 5238  | 0.3170557 | hypothetical protein                                    | Late | Late    |
| CT577 |        | 1395  | 0.3167684 | hypothetical protein                                    |      | Late    |
| CT148 | mhpA   | 5656  | 0.3156369 | FAD-dependent monooxygenase                             |      |         |
| CT194 | mgtE   | 5461  | 0.3144538 | Mg2 transporter                                         |      |         |
| CT814 |        | 1565  | 0.3133599 | hypothetical protein                                    | Late | Late    |
| CT076 | smpB   | 1610  | 0.3128356 | SsrA-binding protein                                    |      |         |
| CT394 | hrcA   | 4449  | 0.3120359 | heat-inducible transcription repressor                  |      | Late    |
| CT732 | ribH   | 1689  | 0.3119077 | 6,7-dimethyl-8-ribityllumazine synthase                 |      |         |
| CT379 | hflX   | 5052  | 0.3119004 | GTP binding protein                                     |      |         |
| CT567 |        | 1886  | 0.3116997 | hypothetical protein                                    |      |         |
| CT084 |        | 3993  | 0.3116736 | phospholipase D superfamily protein                     |      | Late    |
| CT635 |        | 1663  | 0.3107204 | hypothetical protein                                    |      | Midlate |
| CT463 | truA   | 2842  | 0.3101611 | tRNA pseudouridine synthase A                           |      |         |
| CT138 |        | 3509  | 0.3096179 | microsomal dipeptidase                                  |      |         |
| CT711 |        | 8358  | 0.3088497 | hypothetical protein                                    |      | Late    |
| CT340 | pdhA/B | 7368  | 0.308743  | 2-oxoisovalerate dehydrogenase alpha subunit            |      |         |
| CT374 | arcD   | 5258  | 0.3073178 | arginine/ornithine antiporter                           |      |         |
| CT679 | tsf    | 3166  | 0.3067647 | elongation factor Ts                                    |      |         |
| CT256 |        | 4397  | 0.3059165 | hypothetical protein                                    |      |         |
| CT214 |        | 5982  | 0.3032452 | hypothetical protein                                    | Late | Late    |
| CT472 |        | 2837  | 0.3032118 | hypothetical protein                                    |      |         |
| CT400 | sucB_2 | 4006  | 0.302543  | branched-chain alpha-keto acid dehydrogenase subunit E2 |      |         |
| CT263 |        | 2118  | 0.3025216 | hypothetical protein                                    |      |         |
| CT057 | gcpE   | 6487  | 0.3016625 | 4-hydroxy-3-methylbut-2-en-1-yl diphosphate synthase    |      |         |
| CT140 | ypdP   | 2480  | 0.3011226 | hypothetical protein                                    |      | Late    |
| CT748 | mfd    | 11798 | 0.3003734 | transcription-repair coupling factor                    |      |         |
| CT467 | atoS   | 3422  | 0.2982915 | 2-component regulatory system-sensor histidine kinase   |      |         |
| CT624 | mviN   | 5653  | 0.2978966 | integral membrane protein                               |      |         |
| CT545 | dnaE   | 13014 | 0.2974277 | DNA polymerase III subunit alpha                        |      |         |
| CT703 | engA   | 5115  | 0.2971275 | GTP-binding protein EngA                                |      |         |
| CT217 | ydaO   | 2366  | 0.2959351 | PP-loop superfamily ATPase                              |      |         |
| CT688 | parB   | 3096  | 0.2951474 | chromosome partitioning protein                         |      |         |
| CT575 | mutL   | 5731  | 0.29319   | DNA mismatch repair protein                             |      |         |
| CT497 | dnaB   | 4633  | 0.2910327 | replicative DNA helicase                                |      |         |
| CT329 | xseA   | 5105  | 0.2905075 | exodeoxyribonuclease VII large subunit                  |      |         |



|         |        |      |           |                                                         |       |           |
|---------|--------|------|-----------|---------------------------------------------------------|-------|-----------|
| CT815   | glmM   | 4487 | 0.2897044 | phosphoglucosamine mutase                               |       |           |
| CT115   |        | 1440 | 0.288664  | inclusion membrane protein D                            | Early |           |
| CT262   |        | 2596 | 0.2885514 | hypothetical protein                                    |       |           |
| CT018   |        | 1544 | 0.2869658 | hypothetical protein                                    |       |           |
| CT252   | lgt    | 2571 | 0.2839016 | prolipoprotein diacylglyceryl transferase               |       |           |
| CT845   |        | 885  | 0.2833383 | hypothetical protein                                    |       |           |
| CT335   |        | 1010 | 0.2821186 | hypothetical protein                                    |       |           |
| CT774   | cysQ   | 3095 | 0.281679  | 3'(2'),5'-bisphosphate nucleotidase                     | Early |           |
| CT181   |        | 2492 | 0.2806766 | hypothetical protein                                    |       | Late      |
| CT857   |        | 4268 | 0.2794381 | Na /H antiporter                                        |       |           |
| CT220   | ubiX   | 1818 | 0.2782167 | aromatic acid decarboxylase                             |       |           |
| CT848   |        | 1652 | 0.2779484 | hypothetical protein                                    |       | Late      |
| CT458   | YhhY   | 1576 | 0.2769883 | ribosomal-protein-alanine acetyltransferase             |       | Late      |
| CT529   |        | 2839 | 0.2768478 | hypothetical protein                                    | Early |           |
| CT063   | gnd    | 4433 | 0.2765677 | 6-phosphogluconate dehydrogenase                        |       |           |
| CT454   | argS   | 5361 | 0.2755128 | arginyl-tRNA synthetase                                 |       |           |
| CT684   |        | 4603 | 0.2753095 | cysteine desulfurase activator complex subunit SufB     |       |           |
| CT153   |        | 7850 | 0.2745301 | MAC/perforin family protein                             |       |           |
| CT297   | rnc    | 2272 | 0.273808  | ribonuclease III                                        |       |           |
| CT738   | yycJ   | 2490 | 0.2733444 | Zn-dependent hydrolase                                  |       |           |
| CT093   | ribF   | 2842 | 0.2699016 | bifunctional riboflavin kinase/FMN adenylyltransferase  |       |           |
| CT255   |        | 1240 | 0.2689725 | hypothetical protein                                    |       |           |
| CT305   | atpI   | 6006 | 0.2677309 | V-type ATP synthase subunit I                           |       |           |
| CT747   | hemE   | 3142 | 0.2661826 | uroporphyrinogen decarboxylase                          |       |           |
| CT247   | pdhC   | 4162 | 0.265296  | branched-chain alpha-keto acid dehydrogenase subunit E2 |       |           |
| CT209   | leuS   | 7504 | 0.2652656 | leucyl-tRNA synthetase                                  |       |           |
| CT108   | ybgI   | 2340 | 0.2650438 | Acr family transporter                                  |       |           |
| CT055   | sucB_1 | 3607 | 0.2649814 | dihydrolipoamide succinyltransferase                    |       |           |
| CT806   | ptr    | 8992 | 0.2637693 | insulinase family/protease III                          |       |           |
| CT851   | map    | 2684 | 0.2633291 | methionine aminopeptidase                               | Early |           |
| CT593.1 |        | 535  | 0.263319  | hypothetical protein                                    |       |           |
| CT360   |        | 1857 | 0.2630741 | hypothetical protein                                    |       | Midlate   |
| CT129   | glnP   | 1905 | 0.2621251 | amino acid ABC transporter ATPase                       |       |           |
| CT644   | yohI   | 3112 | 0.2619993 | oxidoreductase                                          |       |           |
| CT805   |        | 4035 | 0.2588508 | hypothetical protein                                    |       |           |
| CT839   |        | 3092 | 0.2583614 | hypothetical protein                                    |       |           |
| CT765   | rsbV_2 | 1010 | 0.2582369 | anti-sigma F factor antagonist                          |       |           |
| CT578   |        | 4700 | 0.2564476 | hypothetical protein                                    | Late  | Late      |
| CT746   | hemN_2 | 4153 | 0.2562028 | coproporphyrinogen III oxidase                          |       |           |
| CT246   | pdhB   | 3059 | 0.2544424 | pyruvate dehydrogenase E1 component beta subunit        |       |           |
| CT390   | aspC   | 3386 | 0.2543222 | L,L-diaminopimelate aminotransferase                    |       |           |
| CT726   | rodA   | 3539 | 0.2537359 | rod shape protein                                       |       |           |
| CT257   |        | 3535 | 0.253551  | hypothetical protein                                    |       |           |
| CT640   | recC   | 8446 | 0.2524235 | exodeoxyribonuclease V gamma chain                      |       |           |
| CT571   | gspE   | 4191 | 0.2516693 | general secretion pathway protein E                     |       |           |
| CT165   |        | 1233 | 0.250691  | hypothetical protein                                    |       |           |
| CT792   | mutS   | 7366 | 0.2505168 | DNA mismatch repair protein MutS                        |       |           |
| CT249   |        | 1026 | 0.2498815 | hypothetical protein                                    |       | Very late |
| CT423   |        | 3011 | 0.2492884 | CBS domain-containing protein                           |       |           |
| CT184   | yqgF   | 1382 | 0.247963  | Holliday junction resolvase-like protein                |       |           |
| CT101   |        | 1331 | 0.2477702 | hypothetical protein                                    |       |           |
| CT418   | obgE   | 2759 | 0.2468727 | GTPase ObgE                                             |       |           |

|         |         |      |           |                                                            |       |           |
|---------|---------|------|-----------|------------------------------------------------------------|-------|-----------|
| CT357R  |         | 814  | 0.2458171 | hypothetical protein                                       |       |           |
| CT718   |         | 1432 | 0.2439438 | hypothetical protein                                       |       |           |
| CT259   |         | 1942 | 0.2433062 | PP2C phosphatase family protein                            |       | Midlate   |
| CT205   | pfkA_1  | 4677 | 0.2425351 | diphosphate--fructose-6-phosphate 1-phosphotransferase     |       |           |
| CT682   | pbpB    | 9550 | 0.242075  | penicillin-binding protein                                 |       |           |
| CT594   | ycfH    | 2222 | 0.2414618 | PHP superfamily hydrolase                                  |       |           |
| CT213   | rpiA    | 1940 | 0.241378  | ribose-5-phosphate isomerase A                             |       | Late      |
| CT875   |         | 1744 | 0.2409584 | hypothetical protein                                       |       | Late      |
| CT298   | radA    | 3735 | 0.2406721 | DNA repair protein RadA                                    |       |           |
| CT204   | ybhI    | 3924 | 0.2403154 | dicarboxylate translocator                                 |       |           |
| CT232   | incB    | 921  | 0.2384298 | inclusion membrane protein B                               |       |           |
| CT015   | phoH    | 3546 | 0.2383474 | ATPase                                                     |       |           |
| CT622   |         | 5637 | 0.2373209 | hypothetical protein                                       |       | Late      |
| CT590   |         | 7982 | 0.2371093 | hypothetical protein                                       |       | Midlate   |
| CT475   | pheT    | 6554 | 0.236442  | phenylalanyl-tRNA synthetase subunit beta                  |       |           |
| CT308   | atpA    | 4739 | 0.2360453 | V-type ATP synthase subunit A                              |       |           |
| CT200   | oppC_1  | 2311 | 0.2358847 | oligopeptide permease                                      |       |           |
| CT199   | oppB_1  | 2585 | 0.235836  | oligopeptide permease                                      |       |           |
| CT389   |         | 3314 | 0.2328829 | hypothetical protein                                       |       |           |
| CT350   |         | 4586 | 0.2325987 | hypothetical protein                                       |       |           |
| CT198   | oppA_3  | 4179 | 0.2318529 | oligopeptide binding protein                               |       |           |
| CT135   |         | 2861 | 0.2314952 | hypothetical protein                                       |       |           |
| CT855   | fumC    | 3688 | 0.2304661 | fumarate hydratase                                         |       |           |
| CT227   |         | 1072 | 0.229581  | hypothetical protein                                       |       |           |
| CT146   | ligA    | 5287 | 0.2290061 | NAD-dependent DNA ligase LigA                              |       |           |
| CT288   |         | 4660 | 0.2280746 | hypothetical protein                                       | Early | Late      |
| CT197   | gcp_1   | 2673 | 0.228024  | putative DNA-binding/iron metalloprotein/AP endonuclease   |       |           |
| CT495   |         | 4218 | 0.2275143 | ADP/ATP translocase                                        | Early |           |
| CT796   | glyQ    | 7949 | 0.2267664 | glycyl-tRNA synthetase                                     |       |           |
| CT235   |         | 1100 | 0.226229  | CRP family transcriptional regulator                       |       |           |
| CT838   |         | 2950 | 0.2254509 | hypothetical protein                                       |       |           |
| CT791   | uvrC    | 4633 | 0.2237993 | excinuclease ABC subunit C                                 |       |           |
| CT794   | dnaG    | 4405 | 0.2231074 | DNA primase                                                |       |           |
| CT847   |         | 1379 | 0.2226799 | hypothetical protein                                       | Late  |           |
| CT484   |         | 2589 | 0.2219261 | hypothetical protein                                       |       |           |
| CT417   |         | 2234 | 0.2210668 | metal transport protein                                    |       |           |
| CT130   | glnQ    | 1806 | 0.2207897 | amino acid ABC transporter ATPase                          |       |           |
| CT818   | tyrP_2  | 2823 | 0.2201534 | tyrosine transporter                                       |       |           |
| CT572   | gspD    | 5550 | 0.2200094 | general secretion pathway protein D                        |       |           |
| CT650   | recA    | 2749 | 0.2199874 | recombinase A                                              |       | Midlate   |
| CT676   |         | 1316 | 0.2198088 | hypothetical protein                                       |       |           |
| CT766   | miaA    | 2642 | 0.2193513 | tRNA delta(2)-isopentenylpyrophosphate transferase         |       |           |
| CT035   |         | 2042 | 0.2169937 | biotin protein ligase                                      | Early | Very late |
| CT284   |         | 3529 | 0.2161889 | phospholipase D                                            |       |           |
| CT826   | pssA    | 2022 | 0.2157327 | CDP-diacylglycerol--serine O-phosphatidyltransferase       |       |           |
| CT127   | ydhO    | 2086 | 0.2155457 | polysaccharide hydrolase invasin repeat-containing protein |       |           |
| CT620   |         | 6468 | 0.2128328 | hypothetical protein                                       |       | Late      |
| CT229   |         | 1583 | 0.211273  | hypothetical protein                                       | Early |           |
| CT456   |         | 7582 | 0.2109943 | hypothetical protein                                       |       | Late      |
| CT604   | groEL_2 | 3888 | 0.2109403 | HSP-60                                                     |       |           |
| CT277   |         | 1623 | 0.2095808 | hypothetical protein                                       |       |           |
| CT496.1 |         | 318  | 0.2089303 | hypothetical protein                                       |       |           |

|         |         |      |           |                                                                  |       |           |
|---------|---------|------|-----------|------------------------------------------------------------------|-------|-----------|
| CT856   | ychM    | 3994 | 0.2072116 | sulfate transporter                                              |       |           |
| CT616   |         | 2947 | 0.2066732 | hypothetical protein                                             |       |           |
| CT698   | trmE    | 3139 | 0.2065532 | tRNA modification GTPase TrmE                                    |       |           |
| CT483   |         | 889  | 0.2060415 | hypothetical protein                                             |       |           |
| CT059   | fer     | 613  | 0.2058454 | ferredoxin                                                       |       |           |
| CT685   |         | 1808 | 0.2057169 | ABC transporter ATP-binding protein                              |       |           |
| CT301   | pknD    | 6482 | 0.2040098 | serine/threonine-protein kinase                                  |       |           |
| CT566   |         | 2408 | 0.2037279 | hypothetical protein                                             |       |           |
| CT240   | recR    | 1378 | 0.2027102 | recombination protein RecR                                       |       |           |
| CT331   | dxs     | 4408 | 0.20156   | 1-deoxy-D-xylulose-5-phosphate synthase                          |       |           |
| CT052   | hemN_1  | 2472 | 0.1994579 | coproporphyrinogen III oxidase                                   |       | Late      |
| CT206   |         | 1937 | 0.1985244 | acyltransferase family protein                                   |       |           |
| CT183   | pyrG    | 4053 | 0.1974824 | CTP synthetase                                                   |       |           |
| CT767   |         | 2362 | 0.1972917 | hypothetical protein                                             |       |           |
| CT633   | hemB    | 2292 | 0.1972412 | delta-aminolevulinic acid dehydratase                            |       |           |
| CT201   | oppD    | 1933 | 0.1972003 | oligopeptide transport ATPase                                    |       |           |
| CT088   | sycE    | 946  | 0.1970457 | secretion chaperone                                              |       |           |
| CT677   | frr     | 1291 | 0.1963105 | ribosome recycling factor                                        |       |           |
| CT221.1 |         | 295  | 0.1962349 | hypothetical protein                                             |       |           |
| CT270   | pbp3    | 4226 | 0.1947033 | penicillin-binding protein                                       |       |           |
| CT586   | uvrB    | 4497 | 0.1946438 | excinuclease ABC subunit B                                       |       |           |
| CT387   |         | 4533 | 0.1942975 | hypothetical protein                                             |       |           |
| CT109   |         | 1805 | 0.1939423 | hypothetical protein                                             |       |           |
| CT807   | plsB    | 2316 | 0.1926208 | glycerol-3-phosphate acyltransferase                             |       |           |
| CT488   |         | 1701 | 0.1926079 | hypothetical protein                                             |       |           |
| CT844   | yfhC    | 1058 | 0.1925757 | cytosine deaminase                                               |       |           |
| CT481   |         | 1608 | 0.1923757 | hypothetical protein                                             |       |           |
| CT010   | htrB    | 3066 | 0.1920098 | lipid A biosynthesis lauroyl acyltransferase                     |       |           |
| CT573   |         | 2563 | 0.190617  | hypothetical protein                                             |       |           |
| CT384   |         | 3503 | 0.1882578 | hypothetical protein                                             |       |           |
| CT427   |         | 1791 | 0.1877179 | hypothetical protein                                             |       |           |
| CT008   | rnhB_1  | 1939 | 0.1873852 | ribonuclease HIII                                                |       |           |
| CT714   | gpsA    | 2067 | 0.1870994 | NAD(P)H-dependent glycerol-3-phosphate dehydrogenase             |       |           |
| CT309   |         | 1691 | 0.1869014 | hypothetical protein                                             |       |           |
| CT061   | fliA    | 1632 | 0.1865393 | RNA polymerase sigma factor sigma-28                             |       |           |
| CT208   | gseA    | 2466 | 0.1857514 | 3-deoxy-D-manno-octulosonic-acid transferase                     |       |           |
| CT742   | ygcA    | 2489 | 0.1839789 | rRNA methyltransferase                                           |       |           |
| CT147   |         | 9577 | 0.1830891 | hypothetical protein                                             | Early | Very late |
| CT846   |         | 1387 | 0.1828684 | hypothetical protein                                             |       |           |
| CT739   | ftsK    | 4818 | 0.1808686 | cell division protein FtsK                                       |       |           |
| CT580   |         | 2001 | 0.1790066 | hypothetical protein                                             |       |           |
| CT426   |         | 2247 | 0.1745589 | hypothetical protein                                             |       |           |
| CT745   | hemG    | 2503 | 0.1738093 | protoporphyrinogen oxidase                                       |       |           |
| CT391   |         | 2047 | 0.1728824 | hypothetical protein                                             |       |           |
| CT033   | recD_1  | 4455 | 0.1721867 | exodeoxyribonuclease V alpha chain                               |       |           |
| CT854   |         | 3535 | 0.1719491 | ABC transporter permease fused to pyrimidine biosynthesis enzyme |       |           |
| CT152   | ycfV    | 1338 | 0.1711803 | ABC transporter ATPase                                           |       |           |
| CT687   | yfhO_1  | 2409 | 0.1707869 | cysteine desulfurase                                             |       |           |
| CT755   | groEL_3 | 2898 | 0.1706142 | 60 kDa chaperonin GroEL                                          |       |           |
| CT837   |         | 4162 | 0.1703334 | hypothetical protein                                             |       |           |
| CT338   |         | 868  | 0.1678384 | hypothetical protein                                             |       |           |

|       |        |      |           |                                                                                                            |       |         |
|-------|--------|------|-----------|------------------------------------------------------------------------------------------------------------|-------|---------|
| CT459 | prfB   | 2087 | 0.1672115 | peptide chain release factor 2                                                                             |       | Late    |
| CT285 | lplA_1 | 1414 | 0.1665363 | lipoate-protein ligase A                                                                                   |       |         |
| CT570 | gspF   | 2020 | 0.1664476 | general secretion pathway protein F                                                                        |       |         |
| CT346 | elaC   | 1731 | 0.1659126 | ribonuclease Z                                                                                             |       | Midlate |
| CT730 | ribD   | 2197 | 0.1644965 | riboflavin deaminase                                                                                       |       |         |
| CT555 |        | 6927 | 0.1632644 | SWI/SNF family helicase                                                                                    |       |         |
| CT548 |        | 1101 | 0.1621617 | hypothetical protein                                                                                       |       |         |
| CT020 | lepB   | 3533 | 0.1618725 | signal peptidase I                                                                                         |       |         |
| CT721 | yfhO_2 | 2143 | 0.1617244 | NifS-related protein                                                                                       |       |         |
| CT809 |        | 590  | 0.1610418 | hypothetical protein                                                                                       |       |         |
| CT164 |        | 513  | 0.1609203 | hypothetical protein                                                                                       |       |         |
| CT595 | dsbD   | 4034 | 0.1606704 | Thio:disulfide interchange protein                                                                         |       |         |
| CT489 | glgC   | 2348 | 0.1571834 | glucose-1-phosphate adenylyltransferase                                                                    |       | Late    |
| CT171 | trpA   | 1417 | 0.1565569 | tryptophan synthase subunit alpha                                                                          |       |         |
| CT415 | yebL   | 1530 | 0.1564621 | solute-binding protein                                                                                     |       |         |
| CT756 | murF   | 2479 | 0.1560224 | UDP-N-acetylmuramoyl-tripeptide--D-alanyl-D- alanine ligase                                                |       |         |
| CT534 | Int    | 2984 | 0.1559149 | apolipoprotein N-acyltransferase                                                                           |       |         |
| CT299 | hemC   | 1282 | 0.1553369 | porphobilinogen deaminase                                                                                  |       |         |
| CT725 | birA   | 905  | 0.1537204 | biotin--protein ligase                                                                                     |       |         |
| CT325 |        | 766  | 0.1535967 | hypothetical protein                                                                                       |       |         |
| CT863 |        | 2595 | 0.1534407 | hypothetical protein                                                                                       |       |         |
| CT365 |        | 3076 | 0.1529762 | hypothetical protein                                                                                       | Early | Late    |
| CT695 |        | 2068 | 0.1505797 | hypothetical protein                                                                                       |       | Late    |
| CT366 | aroA   | 2266 | 0.1502589 | 3-phosphoshikimate 1-carboxyvinyltransferase                                                               |       |         |
| CT383 |        | 1193 | 0.1493602 | hypothetical protein                                                                                       |       |         |
| CT867 |        | 1788 | 0.1492081 | hypothetical protein                                                                                       | Late  |         |
| CT473 |        | 484  | 0.1482725 | hypothetical protein                                                                                       | Early |         |
| CT202 | oppF   | 1311 | 0.147785  | oligopeptide transport ATPase                                                                              |       |         |
| CT085 |        | 2960 | 0.1475025 | hypothetical protein                                                                                       |       |         |
| CT591 | sdhB   | 1128 | 0.1464399 | succinate dehydrogenase iron-sulfur subunit                                                                |       |         |
| CT609 | rpoN   | 2236 | 0.14533   | RNA polymerase factor sigma-54                                                                             |       |         |
| CT642 |        | 1424 | 0.1450648 | hypothetical protein                                                                                       |       |         |
| CT226 |        | 865  | 0.1419387 | hypothetical protein                                                                                       |       |         |
| CT233 | incC   | 842  | 0.1408246 | inclusion membrane protein C                                                                               |       | Early   |
| CT382 | aroG   | 1374 | 0.1408199 | 3-deoxy-7-phosphoheptulonate synthase                                                                      |       |         |
| CT054 | sucA   | 4784 | 0.140411  | 2-oxoglutarate dehydrogenase E1 component                                                                  |       |         |
| CT720 |        | 1286 | 0.1401839 | NifU-related protein                                                                                       |       |         |
| CT231 |        | 2431 | 0.1398317 | sodium-dependent amino acid transporter                                                                    |       |         |
| CT862 | lcrH_2 | 939  | 0.1393661 | type III secretion chaperone                                                                               |       |         |
| CT167 |        | 2061 | 0.1392746 | hypothetical protein                                                                                       |       |         |
| CT224 |        | 691  | 0.1392554 | hypothetical protein                                                                                       |       |         |
| CT351 |        | 3241 | 0.139119  | hypothetical protein                                                                                       |       |         |
| CT133 |        | 1285 | 0.1385044 | rRNA methylase                                                                                             | Early |         |
| CT222 |        | 588  | 0.1380921 | hypothetical protein                                                                                       |       |         |
| CT083 |        | 797  | 0.1371928 | hypothetical protein                                                                                       |       | Late    |
| CT416 |        | 1102 | 0.1360971 | ABC transporter ATPase                                                                                     |       |         |
| CT724 |        | 818  | 0.1360734 | hypothetical protein                                                                                       |       |         |
| CT440 |        | 555  | 0.1356558 | hypothetical protein                                                                                       |       |         |
| CT078 | folD   | 1275 | 0.1354628 | bifunctional 5,10-methylene-tetrahydrofolate dehydrogenase/ 5,10-methylene-tetrahydrofolate cyclohydrolase |       |         |
| CT699 | psdD   | 1467 | 0.1353472 | phosphatidylserine decarboxylase                                                                           |       |         |
| CT487 | yhhF   | 891  | 0.1337155 | methyltransferase                                                                                          |       |         |

|       |        |      |           |                                                     |       |         |
|-------|--------|------|-----------|-----------------------------------------------------|-------|---------|
| CT219 | ubiA   | 1377 | 0.132743  | prenyltransferase                                   |       |         |
| CT778 | priA   | 3461 | 0.1319877 | primosome assembly protein PriA                     |       |         |
| CT092 | ychF   | 1639 | 0.1317055 | GTP-dependent nucleic acid-binding protein EngD     |       |         |
| CT754 | icc    | 1233 | 0.1310967 | phosphohydrolase                                    |       |         |
| CT619 |        | 4090 | 0.1301223 | hypothetical protein                                |       | Late    |
| CT470 | recO   | 1049 | 0.1289733 | DNA repair protein RecO                             |       |         |
| CT831 | murB   | 1154 | 0.1287518 | UDP-N-acetylenolpyruvoylglucosamine reductase       |       |         |
| CT367 | aroL   | 777  | 0.1282924 | shikimate kinase                                    |       |         |
| CT042 | glgX   | 3011 | 0.1271869 | glycogen hydrolase (debranching)                    |       |         |
| CT860 |        | 2155 | 0.1260855 | hypothetical protein                                |       |         |
| CT605 | ybbC   | 1739 | 0.1257743 | hypothetical protein                                |       |         |
| CT840 | mesJ   | 1479 | 0.1250478 | PP-loop superfamily ATPase                          |       | Late    |
| CT647 |        | 752  | 0.1247678 | hypothetical protein                                |       |         |
| CT074 | recF   | 1611 | 0.1246503 | recombination protein F                             |       |         |
| CT757 | mraY   | 1455 | 0.1246252 | phospho-N-acetylmuramoyl-pentapeptide- transferase  |       |         |
| CT345 |        | 535  | 0.1242902 | hypothetical protein                                |       |         |
| CT411 | lpxB   | 2574 | 0.1220138 | lipid-A-disaccharide synthase                       |       |         |
| CT119 | incA   | 1094 | 0.1219109 | inclusion membrane protein A                        |       |         |
| CT244 |        | 1765 | 0.1212154 | hypothetical protein                                |       |         |
| CT588 | rbsU   | 2677 | 0.1211403 | sigma regulatory family protein-PP2C phosphatase    |       |         |
| CT079 |        | 561  | 0.121091  | hypothetical protein                                |       |         |
| CT597 | exbD   | 516  | 0.1210728 | biopolymer transport protein                        |       |         |
| CT060 | flhA   | 2459 | 0.1189491 | type III secretion system protein                   |       |         |
| CT139 | oppA_1 | 1719 | 0.1185962 | oligopeptide binding protein                        |       |         |
| CT077 | yojL   | 1180 | 0.1184424 | hypothetical protein                                |       |         |
| CT465 |        | 828  | 0.1171992 | hypothetical protein                                |       |         |
| CT131 |        | 4604 | 0.1157573 | transmembrane protein                               |       |         |
| CT193 | tgt    | 1476 | 0.1153986 | queuine tRNA-ribosyltransferase                     |       |         |
| CT047 |        | 1244 | 0.1140327 | hypothetical protein                                |       |         |
| CT175 | oppA_2 | 2040 | 0.1110075 | oligopeptide binding protein permease               |       | Early   |
| CT607 | ung    | 847  | 0.1100326 | uracil-DNA glycosylase                              |       |         |
| CT638 |        | 1042 | 0.1095896 | rod shape-determining protein MreC                  |       |         |
| CT779 |        | 776  | 0.1082689 | hypothetical protein                                |       |         |
| CT468 | atoC   | 1434 | 0.108057  | 2-component regulatory system-ATPase                |       |         |
| CT370 | aroDE  | 1775 | 0.1063869 | bifunctional 3-dehydroquinone dehydratase/shikimate |       |         |
| CT195 |        | 1274 | 0.1062684 | dehydrogenase protein                               |       |         |
| CT441 | tsp    | 2573 | 0.1058073 | tail-specific protease                              |       | Late    |
| CT662 | hemA   | 1176 | 0.1055538 | glutamyl-tRNA reductase                             |       | Midlate |
| CT639 | recB   | 3694 | 0.1055358 | exodeoxyribonuclease V beta chain                   |       |         |
| CT234 |        | 3436 | 0.1053527 | hypothetical protein                                |       |         |
| CT648 |        | 1438 | 0.102275  | hypothetical protein                                | Early |         |
| CT168 |        | 324  | 0.1012498 | hypothetical protein                                |       |         |

(e)

| Gene ID | Gene Symbol | Read Count | RPKM       | Gene Name                      | Belland Classifier | Nicholson Classifier |
|---------|-------------|------------|------------|--------------------------------|--------------------|----------------------|
| CT444   | omcA        | 127957     | 41.3098306 | 9kDa-cysteine-rich lipoprotein | Late               | Late                 |
| CT398.1 |             | 643636     | 40.5691459 | Ribonuclease P RNA             |                    |                      |
| CT480.1 |             | 73708      | 38.6236333 | hypothetical protein           |                    |                      |
| CT081   |             | 73971      | 20.2924577 | hypothetical protein           |                    | Very late            |
| CT843   | rpsO        | 50153      | 15.5987122 | 30S ribosomal protein S15      |                    |                      |
| CT500   | ndk         | 76467      | 15.3072401 | nucleoside diphosphate kinase  |                    | Midlate              |

|         |        |        |            |                                                      |       |            |
|---------|--------|--------|------------|------------------------------------------------------|-------|------------|
| CT786   | rpmJ   | 20419  | 12.5496176 | 50S ribosomal protein L36                            |       |            |
| CT565   |        | 62310  | 12.0735255 | hypothetical protein                                 |       | Late       |
| CT267   | ihfA   | 40326  | 11.3153837 | integration host factor alpha-subunit                |       | Midlate    |
| CT802   | rpsR   | 26456  | 9.4316339  | 30S ribosomal protein S18                            |       |            |
| CT691   |        | 71911  | 8.8706087  | hypothetical protein                                 |       |            |
| CT001   |        | 24863  | 8.5347422  | hypothetical protein                                 |       | Late       |
| CT801   | rpsF   | 29993  | 7.5920442  | 30S ribosomal protein S6                             |       |            |
| CT460   |        | 22915  | 7.5726935  | SWIB (YM74) complex protein                          |       |            |
| CT617   | rpsT   | 27018  | 7.5392159  | 30S ribosomal protein S20                            |       |            |
| CT236   | acpP   | 20443  | 7.3940661  | acyl carrier protein                                 |       | Late       |
| CT785   | rpmH   | 9254   | 6.1648024  | 50S ribosomal protein L34                            |       |            |
| CT342   | rpsU   | 12427  | 5.9863725  | 30S ribosomal protein S21                            |       |            |
| CT787   | rpsN   | 19929  | 5.6307961  | 30S ribosomal protein S14                            |       |            |
| CT110   | groEL  | 118535 | 5.6049313  | chaperonin GroEL                                     | Early | Midcycle   |
| CT313   | tal    | 60213  | 5.2089728  | transaldolase B                                      |       | Midlate    |
| CT803   | rplI   | 29363  | 5.0321246  | 50S ribosomal protein L9                             |       |            |
| CT421.1 |        | 9013   | 4.8485025  | hypothetical protein                                 |       |            |
| CT659   |        | 12601  | 4.6324643  | hypothetical protein                                 | Late  | Late       |
| CT666   |        | 13854  | 4.6052756  | hypothetical protein                                 |       | Midlate    |
| CT443   | omcB   | 93722  | 4.5613878  | 60kD cysteine-rich outer membrane protein            | Late  | Late       |
| CT421.2 |        | 7988   | 4.225818   | hypothetical protein                                 |       |            |
| CT665   |        | 12322  | 4.1355825  | hypothetical protein                                 |       | Midlate    |
| CT080   | ltuB   | 13295  | 4.0063474  | late transcription unit B protein                    | Late  | Late       |
| CT508   | rs11   | 18331  | 3.9853128  | 30S ribosomal protein S11                            |       |            |
| CT022   | rpmE2  | 15024  | 3.9273089  | 50S ribosomal protein L31 type B                     |       |            |
| CT667   |        | 20465  | 3.9027617  | hypothetical protein                                 |       | Midlate    |
| CT769   | ybeB   | 16012  | 3.8385283  | iojap superfamily protein                            |       |            |
| CT784   | rnpA   | 15941  | 3.7951152  | ribonuclease P                                       |       |            |
| CT439m  | rpsL   | 16299  | 3.765468   | 30S ribosomal protein S12                            |       |            |
| CT316   | rplL   | 17851  | 3.7372915  | 50S ribosomal protein L7/L12                         |       |            |
| CT603   | ahpC   | 25986  | 3.6922763  | thioredoxin peroxidase                               |       |            |
| CT734   |        | 28454  | 3.6534982  | hypothetical protein                                 | Early | Midlate    |
| CT312   |        | 15384  | 3.5870277  | ferredoxin                                           |       |            |
| CT398   |        | 32071  | 3.4770503  | hypothetical protein                                 |       |            |
| CT834   | rpmI   | 7760   | 3.4706333  | 50S ribosomal protein L35                            |       |            |
| CT111   | groES  | 13068  | 3.3814939  | co-chaperonin GroES                                  | Early |            |
| CT125   | rplM   | 18752  | 3.372223   | 50S ribosomal protein L13                            |       |            |
| CT798   | glgA   | 55307  | 3.3212414  | glycogen synthase                                    | Late  | Midlate II |
| CT610   |        | 25742  | 3.160319   | hypothetical protein                                 |       | Midlate    |
| CT438   | rs7    | 16920  | 3.1323866  | 30S ribosomal protein S7                             |       |            |
| CT799   | ctc    | 19657  | 3.0598038  | 50S ribosomal protein L25/general stress protein Ctc |       |            |
| CT538   |        | 25296  | 2.977701   | hypothetical protein                                 |       |            |
| CT436   | rpsJ   | 11541  | 2.9189718  | 30S ribosomal protein S10                            |       |            |
| CT509   | rpsM   | 12326  | 2.8410084  | 30S ribosomal protein S13                            |       |            |
| CT043   |        | 16792  | 2.8024988  | hypothetical protein                                 |       | Midlate    |
| CT098   | rpsA   | 57918  | 2.7880614  | 30S ribosomal protein S1                             |       |            |
| CT322   | tuf    | 39654  | 2.7333683  | elongation factor Tu                                 |       |            |
| CT431   | clpP_1 | 18178  | 2.6612342  | ATP-dependent Clp protease proteolytic subunit       |       | Midlate    |
| CT492   | coaE   | 18910  | 2.6478869  | dephospho-CoA kinase                                 |       | Midlate II |
| CT556   |        | 13990  | 2.6421887  | hypothetical protein                                 |       |            |
| CT842   | pnp    | 65530  | 2.6250557  | polynucleotide phosphorylase/polyadenylase           |       | Midlate    |
| CT524   | rpsS   | 7858   | 2.616983   | 30S ribosomal protein S19                            |       |            |

|         |        |        |           |                                                                    |      |            |
|---------|--------|--------|-----------|--------------------------------------------------------------------|------|------------|
| CT525   | rplB   | 25344  | 2.5759787 | 50S ribosomal protein L2                                           |      |            |
| CT526   | rplW   | 10018  | 2.5756043 | 50S ribosomal protein L23                                          |      |            |
| CT743   | hctA   | 12364  | 2.5526242 | histone-like developmental protein                                 | Late |            |
| CT086   | rpmB   | 8004   | 2.533681  | 50S ribosomal protein L28                                          |      |            |
| CT126   | rpsI   | 11841  | 2.5242464 | 30S ribosomal protein S9                                           |      |            |
| CT420   | rplU   | 9496   | 2.4953092 | 50S ribosomal protein L21                                          |      |            |
| CT429   |        | 28343  | 2.449707  | hypothetical protein                                               |      |            |
| CT833   | infC   | 14340  | 2.4247053 | translation initiation factor IF-3                                 |      |            |
| CT810   | rpmF   | 4904   | 2.3450274 | 50S ribosomal protein L32                                          |      |            |
| CT559   | yscJ   | 26652  | 2.3395025 | Yop proteins translocation lipoprotein J                           |      | Midlate    |
| CT790   |        | 13678  | 2.3306351 | hypothetical protein                                               |      |            |
| CT437   | fusA   | 56695  | 2.2873179 | elongation factor G                                                |      |            |
| CT835   | rplT   | 9723   | 2.2648471 | 50S ribosomal protein L20                                          |      |            |
| CT348   | yjjK   | 42774  | 2.2642508 | ABC transporter ATPase                                             |      |            |
| CT317   | rplJ   | 14199  | 2.2620724 | 50S ribosomal protein L10                                          |      |            |
| CT783   |        | 27295  | 2.2464743 | disulfide bond isomerase                                           | Late | Midlate II |
| CT066   |        | 12552  | 2.245391  | hypothetical protein                                               |      | Midlate    |
| CT503   |        | 14131  | 2.197132  | hypothetical protein                                               |      |            |
| CT289   |        | 29146  | 2.1952028 | hypothetical protein                                               |      | Midlate    |
| CT770   | fabF   | 31571  | 2.1720252 | 3-oxoacyl-(acyl carrier protein) synthase II                       |      | Midlate    |
| CT663   |        | 9604   | 2.169652  | hypothetical protein                                               |      | Midlate    |
| CT602   |        | 10266  | 2.1656992 | hypothetical protein                                               |      |            |
| CT706   | clpP   | 15625  | 2.1351812 | ATP-dependent Clp protease proteolytic subunit                     |      |            |
| CT319   | rplK   | 10789  | 2.1327013 | 50S ribosomal protein L11                                          |      |            |
| CT655   | kdsA   | 20420  | 2.1252619 | 2-dehydro-3-deoxyphosphooctonate aldolase                          |      |            |
| CT355   |        | 25003  | 2.1249158 | hypothetical protein                                               |      |            |
| CT496   | pgsA_1 | 12332  | 2.1034452 | CDP-diacylglycerol--glycerol-3-phosphate 3-phosphatidyltransferase |      | Midlate    |
| CT506   | rplQ   | 10804  | 2.0885137 | 50S ribosomal protein L17                                          |      |            |
| CT613   | folP   | 32485  | 2.0593882 | dihydropteroate synthase                                           |      |            |
| CT507   | rpoA   | 28260  | 2.0554132 | DNA-directed RNA polymerase subunit alpha                          |      |            |
| CT314   | rpoC   | 101160 | 2.0481621 | DNA-directed RNA polymerase subunit beta'                          |      |            |
| CT819   | yccA   | 17201  | 2.035041  | transport permease                                                 |      | Midlate    |
| CT292   | dut    | 10150  | 2.0202431 | deoxyuridine 5'-triphosphate nucleotidohydrolase                   |      |            |
| CT705   | clpX   | 30160  | 1.9804951 | ATP-dependent protease ATP-binding subunit ClpX                    |      |            |
| CT150   | rpmG   | 3497   | 1.9714612 | 50S ribosomal protein L33                                          |      |            |
| CT095   | rbfA   | 8586   | 1.957213  | ribosome-binding factor A                                          |      |            |
| CT707   | tig    | 31162  | 1.9523891 | trigger factor                                                     |      |            |
| CT382.1 |        | 4576   | 1.9399025 | hypothetical protein                                               |      |            |
| CT242   |        | 12065  | 1.9111798 | OmpH-like Outer membrane protein                                   |      |            |
| CT681   | ompA   | 26486  | 1.8772277 | major outer membrane protein                                       |      | Midlate II |
| CT505   | gapA   | 22374  | 1.8710189 | glyceraldehyde-3-phosphate dehydrogenase                           |      | Midlate    |
| CT504   |        | 19186  | 1.8621851 | hypothetical protein                                               |      | Midlate    |
| CT671   |        | 19248  | 1.8448947 | hypothetical protein                                               |      | Midlate    |
| CT827   | nrdA   | 66934  | 1.8041895 | ribonucleotide-diphosphate reductase subunit alpha                 |      | Midlate    |
| CT709   | mreB   | 22827  | 1.7965789 | rod shape-determining protein MreB                                 |      | Midlate    |
| CT519   | rpsQ   | 5215   | 1.7934929 | 30S ribosomal protein S17                                          |      |            |
| CT511   | rplO   | 8952   | 1.7781633 | 50S ribosomal protein L15                                          |      |            |
| CT626   | rpsD   | 13328  | 1.769718  | 30S ribosomal protein S4                                           |      |            |
| CT402   | lpxK   | 25131  | 1.758224  | tetraacyldisaccharide 4'-kinase                                    |      |            |
| CT708   |        | 73565  | 1.7512154 | SWF/SNF family helicase                                            |      | Midlate    |
| CT169   | trpR   | 5995   | 1.7440721 | Trp operon repressor                                               |      |            |

|         |        |       |           |                                                              |            |
|---------|--------|-------|-----------|--------------------------------------------------------------|------------|
| CT771   |        | 8984  | 1.7423986 | hydrolase/phosphatase-like protein                           |            |
| CT780   |        | 9902  | 1.7366949 | protein disulfide isomerase                                  | Late       |
| CT692   |        | 25736 | 1.735956  | inorganic phosphate transporter                              |            |
| CT136   |        | 14582 | 1.7323721 | lysophospholipase esterase                                   |            |
| CT775   |        | 15346 | 1.7311383 | 1-acyl-sn-glycerol-3-phosphate acyltransferase               | Late       |
| CT067   | ytgA   | 19285 | 1.7263126 | solute protein binding family                                |            |
| CT381   | artJ   | 15481 | 1.7256006 | arginine binding protein                                     |            |
| CT523   | rplV   | 6267  | 1.678718  | 50S ribosomal protein L22                                    |            |
| CT539   | trxA   | 5950  | 1.6672268 | thioredoxin                                                  |            |
| CT849.1 |        | 3435  | 1.6661718 | hypothetical protein                                         |            |
| CT518   | rplN   | 7009  | 1.6647633 | 50S ribosomal protein L14                                    |            |
| CT359   |        | 10826 | 1.6335693 | hypothetical protein                                         |            |
|         |        |       |           | UDP-N-acetylmuramoylalanyl-D-glutamate--2, 6-diaminopimelate |            |
| CT269   | murE   | 27455 | 1.6315372 | ligase                                                       |            |
| CT713   | porB   | 18682 | 1.6249335 | outer membrane protein B                                     | Midlate II |
| CT407   | dksA   | 7333  | 1.6126414 | dnaK suppressor protein                                      |            |
| CT828   | nrdB   | 19763 | 1.6079871 | ribonucleotide-diphosphate reductase subunit beta            | Midlate    |
| CT668   |        | 12754 | 1.607224  | hypothetical protein                                         | Midlate    |
| CT318   | rplA   | 13557 | 1.599722  | 50S ribosomal protein L1                                     |            |
| CT065   |        | 31944 | 1.5940853 | ADP/ATP translocase                                          | Early      |
| CT068   | ytgB_1 | 14494 | 1.5713382 | rRNA methylase                                               |            |
| CT396   | dnaK   | 39262 | 1.5631737 | molecular chaperone DnaK                                     | Late       |
| CT097   | nusA   | 24379 | 1.5514612 | transcription elongation factor NusA                         |            |
| CT768   |        | 30374 | 1.5508332 | hypothetical protein                                         | Midlate    |
| CT513   | rplR   | 6587  | 1.5496041 | 50S ribosomal protein L18                                    |            |
| CT664   |        | 43145 | 1.5306274 | FHA domain-containing protein                                | Midlate    |
| CT611   |        | 12728 | 1.5232445 | hypothetical protein                                         | Midlate    |
| CT491   | rho    | 24735 | 1.52082   | transcription termination factor Rho                         | Midlate II |
| CT656   |        | 5184  | 1.5200637 | hypothetical protein                                         |            |
| CT013   | cydA   | 23762 | 1.5193675 | cytochrome d ubiquinol oxidase subunit I                     | Midlate    |
| CT702   |        | 9089  | 1.5067171 | hypothetical protein                                         | Very late  |
|         |        |       |           | tRNA uridine 5-carboxymethylaminomethyl modification enzyme  |            |
| CT498   | gidA   | 32573 | 1.4899686 | GidA                                                         |            |
| CT520   | rpmC   | 3668  | 1.4659831 | 50S ribosomal protein L29                                    |            |
| CT800   | pth    | 9027  | 1.4655789 | peptidyl-tRNA hydrolase                                      |            |
| CT544   | uhpC   | 22947 | 1.4611911 | hexosphosphate transport                                     | Midlate    |
| CT614   | folX   | 6459  | 1.458779  | dihydroneopterin aldolase                                    |            |
| CT341   | dnaJ   | 19346 | 1.455396  | chaperone protein DnaJ                                       |            |
| CT228   |        | 10010 | 1.4414367 | hypothetical protein                                         | Early      |
| CT424   | rsbV_1 | 5684  | 1.4408667 | anti-sigma F factor antagonist                               |            |
| CT512   | rpsE   | 8292  | 1.4311387 | 30S ribosomal protein S5                                     |            |
| CT554   | brnQ   | 20984 | 1.4190678 | branched chain amino acid ABC transporter carrier protein    |            |
| CT241   | yaeT   | 40128 | 1.4146311 | OMP85 family membrane protein                                | Midlate    |
| CT541   | mip    | 12354 | 1.4021371 | peptidyl-prolyl cis-trans isomerase                          |            |
| CT516   | rplE   | 8744  | 1.3927382 | 50S ribosomal protein L5                                     |            |
| CT584   |        | 8912  | 1.3746344 | hypothetical protein                                         | Midlate    |
| CT527   | rplD   | 10483 | 1.3738614 | 50S ribosomal protein L4                                     |            |
| CT419   | rpmA   | 3704  | 1.3681151 | 50S ribosomal protein L27                                    |            |
| CT352   |        | 4852  | 1.3506071 | hypothetical protein                                         |            |
| CT386   |        | 13814 | 1.3446012 | metal dependent hydrolase                                    | Midlate    |
| CT315   | rpoB   | 62593 | 1.3394806 | DNA-directed RNA polymerase subunit beta                     |            |
| CT763   |        | 6707  | 1.33786   | hypothetical protein                                         |            |



|        |      |       |           |                                                              |         |
|--------|------|-------|-----------|--------------------------------------------------------------|---------|
| CT741  | yajC | 5403  | 1.3342188 | preprotein translocase subunit YajC                          |         |
| CT430  | dapF | 12769 | 1.3072251 | diaminopimelate epimerase                                    | Midlate |
| CT824  |      | 43965 | 1.3024114 | zinc metalloprotease                                         |         |
| CT537  | yjeE | 7033  | 1.2983311 | ATPase or kinase                                             |         |
| CT528  | rplC | 9377  | 1.2870041 | 50S ribosomal protein L3                                     |         |
| CT221  | yqfU | 13208 | 1.2866999 | hypothetical protein                                         |         |
| CT510  | secY | 20405 | 1.2790332 | preprotein translocase subunit SecY                          |         |
| CT561  | yscL | 9730  | 1.2751667 | type III secretion system protein                            | Midlate |
| CT002  | gatC | 4653  | 1.2667892 | aspartyl/glutamyl-tRNA amidotransferase subunit C            |         |
| CT385  | ycfF | 4888  | 1.2636651 | Hit family hydrolase                                         | Midlate |
| CT028  | rplS | 5197  | 1.2635789 | 50S ribosomal protein L19                                    |         |
| CT517  | rplX | 4944  | 1.260762  | 50S ribosomal protein L24                                    |         |
| CT026  | rpsP | 4861  | 1.2550304 | 30S ribosomal protein S16                                    |         |
| CT296  |      | 6696  | 1.2533908 | hypothetical protein                                         |         |
| CT621  |      | 36663 | 1.2508202 | hypothetical protein                                         | Midlate |
| CT096  | infB | 40639 | 1.2503143 | translation initiation factor IF-2                           |         |
| CT788  |      | 7254  | 1.2441536 | leader (60) peptide-periplasmic                              |         |
| CT361  | dapA | 12236 | 1.242059  | dihydrodipicolinate synthase                                 |         |
| CT405  | ribC | 8550  | 1.2357354 | riboflavin synthase subunit alpha                            |         |
| CT701  | secA | 41278 | 1.2354756 | preprotein translocase subunit SecA                          | Midlate |
| CT600  | pal  | 8397  | 1.2331379 | peptidoglycan-associated lipoprotein                         | Midlate |
| CT180  | tauB | 10117 | 1.2311003 | nitrate/iron ABC transporter ATPase                          |         |
| CT177  | dsbG | 10154 | 1.2199798 | disulfide bond chaperone                                     |         |
| CT017  |      | 19053 | 1.2116205 | hypothetical protein                                         | Late    |
| CT859  | ispH | 13814 | 1.2067763 | 4-hydroxy-3-methylbut-2-enyl diphosphate reductase           |         |
| CT243  | lpxD | 15139 | 1.2063048 | UDP-3-O-[3-hydroxymyristoyl] glucosamine N-acyltransferase   |         |
| CT612  | folA | 6723  | 1.2057099 | dihydrofolate reductase                                      |         |
| CT406  | nrdR | 6677  | 1.1991416 | transcriptional regulator NrdR                               |         |
| CT678  | pyrH | 10330 | 1.1971297 | uridylyate kinase                                            |         |
| CT039  | dcd  | 8053  | 1.1968164 | deoxycytidine triphosphate deaminase                         |         |
| CT482  |      | 9093  | 1.19145   | hypothetical protein                                         |         |
| CT323  | infA | 3171  | 1.1861734 | translation initiation factor IF-1                           |         |
| CT041  |      | 10990 | 1.1817881 | hypothetical protein                                         | Late    |
| CT736  | ybcL | 6083  | 1.1795911 | hypothetical protein                                         |         |
| CT515  | rpsH | 5266  | 1.1688084 | 30S ribosomal protein S8                                     |         |
| CT514  | rplF | 7425  | 1.1655267 | 50S ribosomal protein L6                                     |         |
| CT351a | secG | 4203  | 1.1609324 | preprotein translocase subunit SecG                          |         |
| CT275  | dnaA | 18449 | 1.1588853 | chromosomal replication initiation protein                   |         |
| CT858  |      | 25646 | 1.146175  | protease                                                     |         |
| CT353  | def  | 7131  | 1.1425044 | peptide deformylase                                          |         |
| CT550  |      | 5688  | 1.1359986 | hypothetical protein                                         | Midlate |
| CT672  | fliN | 15008 | 1.1273801 | type III secretion system protein                            | Midlate |
| CT582  | minD | 9935  | 1.1060616 | chromosome partitioning ATPase-CHLTR plasmid protein homolog |         |
| CT522  | rpsC | 8196  | 1.0991597 | GP5D                                                         |         |
| CT321  | secE | 3168  | 1.0987296 | 30S ribosomal protein S3                                     |         |
| CT364  | dapB | 9725  | 1.0956429 | preprotein translocase subunit SecE                          |         |
| CT670  |      | 6527  | 1.0825593 | dihydrodipicolinate reductase                                |         |
| CT031  |      | 3872  | 1.0804687 | hypothetical protein                                         | Midlate |
| CT543  | hisS | 15751 | 1.0767884 | hypothetical protein                                         |         |
| CT012  | ybbP | 9956  | 1.0632189 | histidyl-tRNA synthetase                                     |         |
| CT294  | sodM | 7590  | 1.0585806 | hypothetical protein                                         |         |
|        |      |       |           | superoxide dismutase                                         |         |

|       |        |       |           |                                                                        |      |            |
|-------|--------|-------|-----------|------------------------------------------------------------------------|------|------------|
| CT533 | lpxC   | 10731 | 1.0577092 | UDP-3-O-[3-hydroxymyristoyl] N-acetylglucosamine deacetylase           |      |            |
| CT094 | truB   | 8753  | 1.0539123 | tRNA pseudouridine synthase B                                          |      |            |
| CT253 |        | 8157  | 1.041969  | hypothetical protein                                                   |      |            |
| CT046 | hctB   | 8006  | 1.0412061 | histone-like protein 2                                                 | Late | Late       |
| CT069 | ytgC   | 16666 | 1.0305912 | integral membrane protein                                              |      |            |
| CT090 | lcrD   | 26550 | 1.0293166 | low calcium response D                                                 |      | Midlate    |
| CT674 | yscC   | 34454 | 1.024511  | Yop proteins translocation protein C/general secretion pathway protein |      | Midlate II |
| CT320 | nusG   | 6491  | 1.0224418 | transcription antitermination protein NusG                             |      |            |
| CT070 | ytgD   | 11759 | 1.0208357 | integral membrane protein                                              |      |            |
| CT291 | ptsN_2 | 5515  | 1.0153351 | PTS IIA protein                                                        |      |            |
| CT535 | yciA   | 5518  | 1.0032389 | acyl-CoA hydrolase                                                     |      | Midlate    |

(f)

| Gene ID | Gene Symbol | Read Count | RPKM       | Gene Name                                            | Belland Classifier | Nicholson Classifier |
|---------|-------------|------------|------------|------------------------------------------------------|--------------------|----------------------|
| CT1444  | omcA        | 127957     | 41.3098306 | 9kDa-cysteine-rich lipoprotein                       | Late               | Late                 |
| CT398.1 |             | 643636     | 40.5691459 | Ribonuclease P RNA                                   |                    |                      |
| CT081   |             | 73971      | 20.2924577 | hypothetical protein                                 |                    | Very late            |
| CT843   | rpsO        | 50153      | 15.5987122 | 30S ribosomal protein S15                            |                    |                      |
| CT500   | ndk         | 76467      | 15.3072401 | nucleoside diphosphate kinase                        |                    | Midlate              |
| CT786   | rpmJ        | 20419      | 12.5496176 | 50S ribosomal protein L36                            |                    |                      |
| CT565   |             | 62310      | 12.0735255 | hypothetical protein                                 |                    | Late                 |
| CT802   | rpsR        | 26456      | 9.4316339  | 30S ribosomal protein S18                            |                    |                      |
| CT691   |             | 71911      | 8.8706087  | hypothetical protein                                 |                    |                      |
| CT801   | rpsF        | 29993      | 7.5920442  | 30S ribosomal protein S6                             |                    |                      |
| CT617   | rpsT        | 27018      | 7.5392159  | 30S ribosomal protein S20                            |                    |                      |
| CT785   | rpmH        | 9254       | 6.1648024  | 50S ribosomal protein L34                            |                    |                      |
| CT342   | rpsU        | 12427      | 5.9863725  | 30S ribosomal protein S21                            |                    |                      |
| CT787   | rpsN        | 19929      | 5.6307961  | 30S ribosomal protein S14                            |                    |                      |
| CT110   | groEL       | 118535     | 5.6049313  | chaperonin GroEL                                     | Early              | Midcycle             |
| CT803   | rplI        | 29363      | 5.0321246  | 50S ribosomal protein L9                             |                    |                      |
| CT421.1 |             | 9013       | 4.8485025  | hypothetical protein                                 |                    |                      |
| CT659   |             | 12601      | 4.6324643  | hypothetical protein                                 | Late               | Late                 |
| CT443   | omcB        | 93722      | 4.5613878  | 60kD cysteine-rich outer membrane protein            | Late               | Late                 |
| CT421.2 |             | 7988       | 4.225818   | hypothetical protein                                 |                    |                      |
| CT080   | ltuB        | 13295      | 4.0063474  | late transcription unit B protein                    | Late               | Late                 |
| CT508   | rs11        | 18331      | 3.9853128  | 30S ribosomal protein S11                            |                    |                      |
| CT022   | rpmE2       | 15024      | 3.9273089  | 50S ribosomal protein L31 type B                     |                    |                      |
| CT784   | rnpA        | 15941      | 3.7951152  | ribonuclease P                                       |                    |                      |
| CT439m  | rpsL        | 16299      | 3.765468   | 30S ribosomal protein S12                            |                    |                      |
| CT316   | rplL        | 17851      | 3.7372915  | 50S ribosomal protein L7/L12                         |                    |                      |
| CT603   | ahpC        | 25986      | 3.6922763  | thioredoxin peroxidase                               |                    |                      |
| CT734   |             | 28454      | 3.6534982  | hypothetical protein                                 | Early              | Midlate              |
| CT398   |             | 32071      | 3.4770503  | hypothetical protein                                 |                    |                      |
| CT834   | rplM        | 7760       | 3.4706333  | 50S ribosomal protein L35                            |                    |                      |
| CT111   | groES       | 13068      | 3.3814939  | co-chaperonin GroES                                  | Early              |                      |
| CT125   | rplM        | 18752      | 3.372223   | 50S ribosomal protein L13                            |                    |                      |
| CT438   | rs7         | 16920      | 3.1323866  | 30S ribosomal protein S7                             |                    |                      |
| CT799   | ctc         | 19657      | 3.0598038  | 50S ribosomal protein L25/general stress protein Ctc |                    |                      |
| CT436   | rpsJ        | 11541      | 2.9189718  | 30S ribosomal protein S10                            |                    |                      |
| CT509   | rpsM        | 12326      | 2.8410084  | 30S ribosomal protein S13                            |                    |                      |
| CT098   | rpsA        | 57918      | 2.7880614  | 30S ribosomal protein S1                             |                    |                      |

|       |        |        |           |                                                                    |            |
|-------|--------|--------|-----------|--------------------------------------------------------------------|------------|
| CT322 | tuf    | 39654  | 2.7333683 | elongation factor Tu                                               |            |
| CT492 | coaE   | 18910  | 2.6478869 | dephospho-CoA kinase                                               | Midlate II |
| CT842 | pnp    | 65530  | 2.6250557 | polynucleotide phosphorylase/polyadenylase                         | Midlate    |
| CT524 | rpsS   | 7858   | 2.616983  | 30S ribosomal protein S19                                          |            |
| CT525 | rplB   | 25344  | 2.5759787 | 50S ribosomal protein L2                                           |            |
| CT526 | rplW   | 10018  | 2.5756043 | 50S ribosomal protein L23                                          |            |
| CT086 | rpmB   | 8004   | 2.533681  | 50S ribosomal protein L28                                          |            |
| CT126 | rpsI   | 11841  | 2.5242464 | 30S ribosomal protein S9                                           |            |
| CT420 | rplU   | 9496   | 2.4953092 | 50S ribosomal protein L21                                          |            |
| CT833 | infC   | 14340  | 2.4247053 | translation initiation factor IF-3                                 |            |
| CT810 | rpmF   | 4904   | 2.3450274 | 50S ribosomal protein L32                                          |            |
| CT437 | fusA   | 56695  | 2.2873179 | elongation factor G                                                |            |
| CT835 | rplT   | 9723   | 2.2648471 | 50S ribosomal protein L20                                          |            |
| CT317 | rplJ   | 14199  | 2.2620724 | 50S ribosomal protein L10                                          |            |
| CT066 |        | 12552  | 2.245391  | hypothetical protein                                               | Midlate    |
| CT602 |        | 10266  | 2.1656992 | hypothetical protein                                               |            |
| CT319 | rplK   | 10789  | 2.1327013 | 50S ribosomal protein L11                                          |            |
| CT496 | pgsA_1 | 12332  | 2.1034452 | CDP-diacylglycerol--glycerol-3-phosphate 3-phosphatidyltransferase | Midlate    |
| CT506 | rplQ   | 10804  | 2.0885137 | 50S ribosomal protein L17                                          |            |
| CT507 | rpoA   | 28260  | 2.0554132 | DNA-directed RNA polymerase subunit alpha                          |            |
| CT314 | rpoC   | 101160 | 2.0481621 | DNA-directed RNA polymerase subunit beta'                          |            |
| CT292 | dut    | 10150  | 2.0202431 | deoxyuridine 5'-triphosphate nucleotidohydrolase                   |            |
| CT150 | rpmG   | 3497   | 1.9714612 | 50S ribosomal protein L33                                          |            |
| CT095 | rbfA   | 8586   | 1.957213  | ribosome-binding factor A                                          |            |
| CT505 | gapA   | 22374  | 1.8710189 | glyceraldehyde-3-phosphate dehydrogenase                           | Midlate    |
| CT504 |        | 19186  | 1.8621851 | hypothetical protein                                               | Midlate    |
| CT519 | rpsQ   | 5215   | 1.7934929 | 30S ribosomal protein S17                                          |            |
| CT511 | rplO   | 8952   | 1.7781633 | 50S ribosomal protein L15                                          |            |
| CT626 | rpsD   | 13328  | 1.769718  | 30S ribosomal protein S4                                           |            |
| CT402 | lpxK   | 25131  | 1.758224  | tetraacyldisaccharide 4'-kinase                                    |            |
| CT169 | trpR   | 5995   | 1.7440721 | Trp operon repressor                                               |            |
| CT136 |        | 14582  | 1.7323721 | lysophospholipase esterase                                         |            |
| CT775 |        | 15346  | 1.7311383 | 1-acyl-sn-glycerol-3-phosphate acyltransferase                     | Late       |
| CT523 | rplV   | 6267   | 1.678718  | 50S ribosomal protein L22                                          |            |
| CT518 | rplN   | 7009   | 1.6647633 | 50S ribosomal protein L14                                          |            |
| CT359 |        | 10826  | 1.6335693 | hypothetical protein                                               |            |
| CT318 | rplA   | 13557  | 1.599722  | 50S ribosomal protein L1                                           |            |
| CT065 |        | 31944  | 1.5940853 | ADP/ATP translocase                                                | Early      |
| CT097 | nusA   | 24379  | 1.5514612 | transcription elongation factor NusA                               |            |
| CT768 |        | 30374  | 1.5508332 | hypothetical protein                                               | Midlate    |
| CT513 | rplR   | 6587   | 1.5496041 | 50S ribosomal protein L18                                          |            |
| CT498 | gidA   | 32573  | 1.4899686 | tRNA uridine 5-carboxymethylaminomethyl modification enzyme GidA   |            |
| CT520 | rpmC   | 3668   | 1.4659831 | 50S ribosomal protein L29                                          |            |
| CT800 | pth    | 9027   | 1.4655789 | peptidyl-tRNA hydrolase                                            |            |
| CT341 | dnaJ   | 19346  | 1.455396  | chaperone protein DnaJ                                             |            |
| CT228 |        | 10010  | 1.4414367 | hypothetical protein                                               | Early      |
| CT512 | rpsE   | 8292   | 1.4311387 | 30S ribosomal protein S5                                           |            |
| CT554 | brnQ   | 20984  | 1.4190678 | branched chain amino acid ABC transporter carrier protein          |            |
| CT516 | rplE   | 8744   | 1.3927382 | 50S ribosomal protein L5                                           |            |
| CT527 | rplD   | 10483  | 1.3738614 | 50S ribosomal protein L4                                           |            |
| CT419 | rpmA   | 3704   | 1.3681151 | 50S ribosomal protein L27                                          |            |
| CT315 | rpoB   | 62593  | 1.3394806 | DNA-directed RNA polymerase subunit beta                           |            |

|       |      |       |           |                                            |      |      |
|-------|------|-------|-----------|--------------------------------------------|------|------|
| CT528 | rplC | 9377  | 1.2870041 | 50S ribosomal protein L3                   |      |      |
| CT221 | yqfU | 13208 | 1.2866999 | hypothetical protein                       |      |      |
| CT510 | secY | 20405 | 1.2790332 | preprotein translocase subunit SecY        |      |      |
| CT028 | rplS | 5197  | 1.2635789 | 50S ribosomal protein L19                  |      |      |
| CT517 | rplX | 4944  | 1.260762  | 50S ribosomal protein L24                  |      |      |
| CT026 | rpsP | 4861  | 1.2550304 | 30S ribosomal protein S16                  |      |      |
| CT096 | infB | 40639 | 1.2503143 | translation initiation factor IF-2         |      |      |
| CT788 |      | 7254  | 1.2441536 | leader (60) peptide-periplasmic            |      |      |
| CT405 | ribC | 8550  | 1.2357354 | riboflavin synthase subunit alpha          |      |      |
| CT180 | tauB | 10117 | 1.2311003 | nitrate/iron ABC transporter ATPase        |      |      |
| CT017 |      | 19053 | 1.2116205 | hypothetical protein                       |      | Late |
| CT678 | pyrH | 10330 | 1.1971297 | uridylyate kinase                          |      |      |
| CT736 | ybcL | 6083  | 1.1795911 | hypothetical protein                       |      |      |
| CT515 | rpsH | 5266  | 1.1688084 | 30S ribosomal protein S8                   |      |      |
| CT514 | rplF | 7425  | 1.1655267 | 50S ribosomal protein L6                   |      |      |
| CT353 | def  | 7131  | 1.1425044 | peptide deformylase                        |      |      |
| CT522 | rpsC | 8196  | 1.0991597 | 30S ribosomal protein S3                   |      |      |
| CT321 | secE | 3168  | 1.0987296 | preprotein translocase subunit SecE        |      |      |
| CT046 | hctB | 8006  | 1.0412061 | histone-like protein 2                     | Late | Late |
| CT320 | nusG | 6491  | 1.0224418 | transcription antitermination protein NusG |      |      |

(g)

| Gene ID  | Gene Symbol | Read Count | RPKM       | Gene Name                                      | Belland Classifier | Nicholson Classifier |
|----------|-------------|------------|------------|------------------------------------------------|--------------------|----------------------|
| CT1480.1 |             | 73708      | 38.6236333 | hypothetical protein                           |                    |                      |
| CT267    | ihfA        | 40326      | 11.3153837 | integration host factor alpha-subunit          |                    | Midlate              |
| CT001    |             | 24863      | 8.5347422  | hypothetical protein                           |                    | Late                 |
| CT460    |             | 22915      | 7.5726935  | SWIB (YM74) complex protein                    |                    |                      |
| CT236    | acpP        | 20443      | 7.3940661  | acyl carrier protein                           |                    | Late                 |
| CT313    | tal         | 60213      | 5.2089728  | transaldolase B                                |                    | Midlate              |
| CT666    |             | 13854      | 4.6052756  | hypothetical protein                           |                    | Midlate              |
| CT665    |             | 12322      | 4.1355825  | hypothetical protein                           |                    | Midlate              |
| CT667    |             | 20465      | 3.9027617  | hypothetical protein                           |                    | Midlate              |
| CT769    | ybeB        | 16012      | 3.8385283  | iojap superfamily protein                      |                    |                      |
| CT312    |             | 15384      | 3.5870277  | ferredoxin                                     |                    |                      |
| CT798    | glgA        | 55307      | 3.3212414  | glycogen synthase                              | Late               | Midlate II           |
| CT610    |             | 25742      | 3.160319   | hypothetical protein                           |                    | Midlate              |
| CT538    |             | 25296      | 2.977701   | hypothetical protein                           |                    |                      |
| CT043    |             | 16792      | 2.8024988  | hypothetical protein                           |                    | Midlate              |
| CT431    | clpP_1      | 18178      | 2.6612342  | ATP-dependent Clp protease proteolytic subunit |                    | Midlate              |
| CT556    |             | 13990      | 2.6421887  | hypothetical protein                           |                    |                      |
| CT743    | hctA        | 12364      | 2.5526242  | histone-like developmental protein             | Late               |                      |
| CT429    |             | 28343      | 2.449707   | hypothetical protein                           |                    |                      |
| CT559    | yscJ        | 26652      | 2.3395025  | Yop proteins translocation lipoprotein J       |                    | Midlate              |
| CT790    |             | 13678      | 2.3306351  | hypothetical protein                           |                    |                      |
| CT348    | yjjK        | 42774      | 2.2642508  | ABC transporter ATPase                         |                    |                      |
| CT783    |             | 27295      | 2.2464743  | disulfide bond isomerase                       | Late               | Midlate II           |
| CT503    |             | 14131      | 2.197132   | hypothetical protein                           |                    |                      |
| CT289    |             | 29146      | 2.1952028  | hypothetical protein                           |                    | Midlate              |
| CT770    | fabF        | 31571      | 2.1720252  | 3-oxoacyl-(acyl carrier protein) synthase II   |                    | Midlate              |
| CT663    |             | 9604       | 2.169652   | hypothetical protein                           |                    | Midlate              |
| CT706    | clpP        | 15625      | 2.1351812  | ATP-dependent Clp protease proteolytic subunit |                    |                      |
| CT655    | kdsA        | 20420      | 2.1252619  | 2-dehydro-3-deoxyphosphooctonate aldolase      |                    |                      |

|         |        |       |           |                                                                     |            |
|---------|--------|-------|-----------|---------------------------------------------------------------------|------------|
| CT355   |        | 25003 | 2.1249158 | hypothetical protein                                                |            |
| CT613   | folP   | 32485 | 2.0593882 | dihydropteroate synthase                                            |            |
| CT819   | yccA   | 17201 | 2.035041  | transport permease                                                  | Midlate    |
| CT705   | clpX   | 30160 | 1.9804951 | ATP-dependent protease ATP-binding subunit ClpX                     |            |
| CT707   | tig    | 31162 | 1.9523891 | trigger factor                                                      |            |
| CT382.1 |        | 4576  | 1.9399025 | hypothetical protein                                                |            |
| CT242   |        | 12065 | 1.9111798 | OmpH-like Outer membrane protein                                    |            |
| CT681   | ompA   | 26486 | 1.8772277 | major outer membrane protein                                        | Midlate II |
| CT671   |        | 19248 | 1.8448947 | hypothetical protein                                                | Midlate    |
| CT827   | nrdA   | 66934 | 1.8041895 | ribonucleotide-diphosphate reductase subunit alpha                  | Midlate    |
| CT709   | mreB   | 22827 | 1.7965789 | rod shape-determining protein MreB                                  | Midlate    |
| CT708   |        | 73565 | 1.7512154 | SWF/SNF family helicase                                             | Midlate    |
| CT771   |        | 8984  | 1.7423986 | hydrolase/phosphatase-like protein                                  |            |
| CT780   |        | 9902  | 1.7366949 | protein disulfide isomerase                                         | Late       |
| CT692   |        | 25736 | 1.735956  | inorganic phosphate transporter                                     |            |
| CT067   | ytgA   | 19285 | 1.7263126 | solute protein binding family                                       |            |
| CT381   | artJ   | 15481 | 1.7256006 | arginine binding protein                                            |            |
| CT539   | trxA   | 5950  | 1.6672268 | thioredoxin                                                         |            |
| CT849.1 |        | 3435  | 1.6661718 | hypothetical protein                                                |            |
| CT269   | murE   | 27455 | 1.6315372 | UDP-N-acetylmuramoylalanyl-D-glutamate--2, 6-diaminopimelate ligase |            |
| CT713   | porB   | 18682 | 1.6249335 | outer membrane protein B                                            | Midlate II |
| CT407   | dksA   | 7333  | 1.6126414 | dnaK suppressor protein                                             |            |
| CT828   | nrdB   | 19763 | 1.6079871 | ribonucleotide-diphosphate reductase subunit beta                   | Midlate    |
| CT668   |        | 12754 | 1.607224  | hypothetical protein                                                | Midlate    |
| CT068   | ytgB_1 | 14494 | 1.5713382 | rRNA methylase                                                      |            |
| CT396   | dnaK   | 39262 | 1.5631737 | molecular chaperone DnaK                                            | Late       |
| CT664   |        | 43145 | 1.5306274 | FHA domain-containing protein                                       | Midlate    |
| CT611   |        | 12728 | 1.5232445 | hypothetical protein                                                | Midlate    |
| CT491   | rho    | 24735 | 1.52082   | transcription termination factor Rho                                | Midlate II |
| CT656   |        | 5184  | 1.5200637 | hypothetical protein                                                |            |
| CT013   | cydA   | 23762 | 1.5193675 | cytochrome d ubiquinol oxidase subunit I                            | Midlate    |
| CT702   |        | 9089  | 1.5067171 | hypothetical protein                                                | Very late  |
| CT544   | uhpC   | 22947 | 1.4611911 | hexosphosphate transport                                            | Midlate    |
| CT614   | folX   | 6459  | 1.458779  | dihydroneopterin aldolase                                           |            |
| CT424   | rsbV_1 | 5684  | 1.4408667 | anti-sigma F factor antagonist                                      |            |
| CT241   | yaeT   | 40128 | 1.4146311 | OMP85 family membrane protein                                       | Midlate    |
| CT541   | mip    | 12354 | 1.4021371 | peptidyl-prolyl cis-trans isomerase                                 |            |
| CT584   |        | 8912  | 1.3746344 | hypothetical protein                                                | Midlate    |
| CT352   |        | 4852  | 1.3506071 | hypothetical protein                                                |            |
| CT386   |        | 13814 | 1.3446012 | metal dependent hydrolase                                           | Midlate    |
| CT763   |        | 6707  | 1.33786   | hypothetical protein                                                |            |
| CT741   | yajC   | 5403  | 1.3342188 | preprotein translocase subunit YajC                                 |            |
| CT430   | dapF   | 12769 | 1.3072251 | diaminopimelate epimerase                                           | Midlate    |
| CT824   |        | 43965 | 1.3024114 | zinc metalloprotease                                                |            |
| CT537   | yjeE   | 7033  | 1.2983311 | ATPase or kinase                                                    |            |
| CT561   | yscL   | 9730  | 1.2751667 | type III secretion system protein                                   | Midlate    |
| CT002   | gatC   | 4653  | 1.2667892 | aspartyl/glutamyl-tRNA amidotransferase subunit C                   |            |
| CT385   | ycfF   | 4888  | 1.2636651 | Hit family hydrolase                                                | Midlate    |
| CT296   |        | 6696  | 1.2533908 | hypothetical protein                                                |            |
| CT621   |        | 36663 | 1.2508202 | hypothetical protein                                                | Midlate    |
| CT361   | dapA   | 12236 | 1.242059  | dihydrodipicolinate synthase                                        |            |
| CT701   | secA   | 41278 | 1.2354756 | preprotein translocase subunit SecA                                 | Midlate    |

|        |        |       |           |                                                                        |            |
|--------|--------|-------|-----------|------------------------------------------------------------------------|------------|
| CT600  | pal    | 8397  | 1.2331379 | peptidoglycan-associated lipoprotein                                   | Midlate    |
| CT177  | dsbG   | 10154 | 1.2199798 | disulfide bond chaperone                                               |            |
| CT859  | ispH   | 13814 | 1.2067763 | 4-hydroxy-3-methylbut-2-enyl diphosphate reductase                     |            |
| CT243  | lpxD   | 15139 | 1.2063048 | UDP-3-O-[3-hydroxymyristoyl] glucosamine N-acyltransferase             |            |
| CT612  | folA   | 6723  | 1.2057099 | dihydrofolate reductase                                                |            |
| CT406  | nrdR   | 6677  | 1.1991416 | transcriptional regulator NrdR                                         |            |
| CT039  | dcd    | 8053  | 1.1968164 | deoxycytidine triphosphate deaminase                                   |            |
| CT482  |        | 9093  | 1.19145   | hypothetical protein                                                   |            |
| CT323  | infA   | 3171  | 1.1861734 | translation initiation factor IF-1                                     |            |
| CT041  |        | 10990 | 1.1817881 | hypothetical protein                                                   | Late       |
| CT351a | secG   | 4203  | 1.1609324 | preprotein translocase subunit SecG                                    |            |
| CT275  | dnaA   | 18449 | 1.1588853 | chromosomal replication initiation protein                             |            |
| CT858  |        | 25646 | 1.146175  | protease                                                               |            |
| CT550  |        | 5688  | 1.1359986 | hypothetical protein                                                   | Midlate    |
| CT672  | fliN   | 15008 | 1.1273801 | type III secretion system protein                                      | Midlate    |
| CT582  | minD   | 9935  | 1.1060616 | chromosome partitioning ATPase-CHLTR plasmid protein homolog GP5D      |            |
| CT364  | dapB   | 9725  | 1.0956429 | dihydrodipicolinate reductase                                          |            |
| CT670  |        | 6527  | 1.0825593 | hypothetical protein                                                   | Midlate    |
| CT031  |        | 3872  | 1.0804687 | hypothetical protein                                                   |            |
| CT543  | hisS   | 15751 | 1.0767884 | histidyl-tRNA synthetase                                               |            |
| CT012  | ybbP   | 9956  | 1.0632189 | hypothetical protein                                                   |            |
| CT294  | sodM   | 7590  | 1.0585806 | superoxide dismutase                                                   |            |
| CT533  | lpxC   | 10731 | 1.0577092 | UDP-3-O-[3-hydroxymyristoyl] N-acetylglucosamine deacetylase           |            |
| CT094  | truB   | 8753  | 1.0539123 | tRNA pseudouridine synthase B                                          |            |
| CT253  |        | 8157  | 1.041969  | hypothetical protein                                                   |            |
| CT069  | ytgC   | 16666 | 1.0305912 | integral membrane protein                                              |            |
| CT090  | lcrD   | 26550 | 1.0293166 | low calcium response D                                                 | Midlate    |
| CT674  | yscC   | 34454 | 1.024511  | Yop proteins translocation protein C/general secretion pathway protein | Midlate II |
| CT070  | ytgD   | 11759 | 1.0208357 | integral membrane protein                                              |            |
| CT291  | ptsN_2 | 5515  | 1.0153351 | PTS IIA protein                                                        |            |
| CT535  | yciA   | 5518  | 1.0032389 | acyl-CoA hydrolase                                                     | Midlate    |
