# Supplementary material for: Simultaneous Transcriptional Profiling of Bacteria and Their Host Cells
Source: PubMed Central journal article supplement (PMC3851178; doi:10.1371/journal.pone.0080597), 2013-12-04
Supplement: pone.0080597.s007.pdf [file pone.0080597.s007.pdf]

**Table S3.**

(a) Genes detected as expressed at 1 hpi by Belland et al (2003) but not present in hRNA-Seq (RPKM>0.1 and 10 mapped reads) (b) Genes detected as expressed at 1 hpi by Belland et al (2003) but not present in hRNA-Seq at 1 hpi (RPKM>1.0 and 50 mapped reads) (c) GO-term enrichment for differentially expressed (versus mock infected) host non-hypothetical genes at 1 hpi (d) GO-term enrichment for differentially expressed (versus mock infected) host non-hypothetical genes at 24 hpi

**(a)**

| Gene ID | Gene Symbol | Function                |
|---------|-------------|-------------------------|
| CT473   | <i>yidD</i> | Predicted a-hemolysin   |
| CT474   |             | Conserved hypothetical  |
| CT774   | <i>cysQ</i> | Biphosphate phosphatase |
| CT850   |             | Conserved hypothetical  |

**(b)**

| Gene ID | Gene Symbol   | Function                   |
|---------|---------------|----------------------------|
| CT365   |               | Conserved hypothetical     |
| CT375   | <i>aad</i>    | D-amino acid dehydrogenase |
| CT376   | <i>mdhC</i>   | Malate dehydrogenase       |
| CT474   |               | Conserved hypothetical     |
| CT480   | <i>oppA.4</i> | Oligopeptide permease      |
| CT774   | <i>cysQ</i>   | Biphosphate phosphatase    |
| CT850   |               | Conserved hypothetical     |
| CT851   | <i>map</i>    | Methionine aminopeptidase  |

**(c)**

|                              |     |                        |
|------------------------------|-----|------------------------|
| GO:0008150 biological_proces | 210 | 387 biological_process |
| GO:0007568 aging (aging)     | 8   | 8 biological_process   |
| GO:0048856 anatomical struct | 99  | 123 biological_process |
| GO:0048646 anatomical struct | 32  | 32 biological_process  |
| GO:0009058 biosynthetic proc | 116 | 126 biological_process |

|                                  |    |                        |
|----------------------------------|----|------------------------|
| GO:0005975 carbohydrate me       | 28 | 28 biological_process  |
| GO:0009056 catabolic process     | 28 | 66 biological_process  |
| GO:0034655 nucleobase-cont       | 14 | 40 biological_process  |
| GO:0016887 ATPase activity       | 12 | 12 molecular_function  |
| GO:0003924 GTPase activity       | 24 | 24 molecular_function  |
| GO:0007155 cell adhesion (ce     | 51 | 51 biological_process  |
| GO:0007049 cell cycle (cell cy   | 21 | 22 biological_process  |
| GO:0008219 cell death (cell de   | 61 | 61 biological_process  |
| GO:0030154 cell differentiator   | 89 | 89 biological_process  |
| GO:0051301 cell division (cell   | 6  | 6 biological_process   |
| GO:0034330 cell junction orga    | 8  | 8 biological_process   |
| GO:0000902 cell morphogene:      | 34 | 34 biological_process  |
| GO:0048870 cell motility (cell r | 40 | 40 biological_process  |
| GO:0008283 cell proliferation (  | 52 | 52 biological_process  |
| GO:0007267 cell-cell signaling   | 34 | 34 biological_process  |
| GO:0022607 cellular compone      | 21 | 49 biological_process  |
| GO:0065003 macromolecular        | 6  | 31 biological_process  |
| GO:0006461 protein complex       | 24 | 24 biological_process  |
| GO:0022618 ribonucleoprote       | 1  | 1 biological_process   |
| GO:0034641 cellular nitrogen (   | 92 | 142 biological_process |
| GO:0006259 DNA metabolic p       | 13 | 13 biological_process  |
| GO:0004518 nuclease activity     | 3  | 3 molecular_function   |
| GO:0006464 cellular protein m    | 74 | 74 biological_process  |
| GO:0051276 chromosome org        | 10 | 10 biological_process  |
| GO:0007059 chromosome seg        | 1  | 1 biological_process   |
| GO:0003013 circulatory syste     | 17 | 17 biological_process  |
| GO:0051186 cofactor metaboli     | 7  | 7 biological_process   |
| GO:0007010 cytoskeleton orga     | 29 | 29 biological_process  |
| GO:0021700 developmental m       | 3  | 3 biological_process   |
| GO:0009790 embryo developm       | 14 | 14 biological_process  |

|                                             |    |    |                    |
|---------------------------------------------|----|----|--------------------|
| GO:0030234 enzyme regulator                 | 31 | 31 | molecular_function |
| GO:0030198 extracellular matrix             | 19 | 19 | biological_process |
| GO:0006091 generation of precursor          | 18 | 18 | biological_process |
| GO:0040007 growth (growth)                  | 17 | 17 | biological_process |
| GO:0004386 helicase activity (              | 2  | 2  | molecular_function |
| GO:0042592 homeostatic process              | 42 | 42 | biological_process |
| GO:0016810 hydrolase activity               | 3  | 3  | molecular_function |
| GO:0016798 hydrolase activity               | 2  | 2  | molecular_function |
| GO:0002376 immune system process            | 70 | 70 | biological_process |
| GO:0016853 isomerase activity               | 1  | 1  | molecular_function |
| GO:0016301 kinase activity (kinase)         | 42 | 42 | molecular_function |
| GO:0016874 ligase activity (ligase)         | 12 | 12 | molecular_function |
| GO:0006629 lipid metabolic process          | 29 | 29 | biological_process |
| GO:0040011 locomotion (locomotion)          | 31 | 56 | biological_process |
| GO:0016829 lyase activity (lyase)           | 10 | 10 | molecular_function |
| GO:0061024 membrane organization            | 28 | 31 | biological_process |
| GO:0007009 plasma membrane organization     | 5  | 5  | biological_process |
| GO:0008168 methyltransferase activity       | 1  | 1  | molecular_function |
| GO:0007005 mitochondrion organization       | 4  | 4  | biological_process |
| GO:0007067 mitosis (mitosis)                | 2  | 2  | biological_process |
| GO:0006397 mRNA processing                  | 1  | 1  | biological_process |
| GO:0050877 neurological system process      | 34 | 34 | biological_process |
| GO:0071941 nitrogen cycle metabolic process | 1  | 1  | biological_process |
| GO:0001071 nucleic acid binding             | 30 | 30 | molecular_function |
| GO:0016779 nucleotidyltransferase activity  | 2  | 2  | molecular_function |
| GO:0016491 oxidoreductase activity          | 23 | 23 | molecular_function |
| GO:0008233 peptidase activity               | 31 | 31 | molecular_function |
| GO:0016791 phosphatase activity             | 7  | 7  | molecular_function |
| GO:0043473 pigmentation (pigmentation)      | 1  | 1  | biological_process |
| GO:0000988 protein binding                  | 9  | 9  | molecular_function |

|                               |     |                        |
|-------------------------------|-----|------------------------|
| GO:0006457 protein folding (p | 3   | 3 biological_process   |
| GO:0051604 protein maturatio  | 9   | 9 biological_process   |
| GO:0000003 reproduction (rep  | 30  | 30 biological_process  |
| GO:0006950 response to stres  | 103 | 103 biological_process |
| GO:0007165 signal transductic | 150 | 154 biological_process |
| GO:0004871 signal transduce   | 47  | 47 molecular_function  |
| GO:0044281 small molecule r   | 74  | 99 biological_process  |
| GO:0006520 cellular amino ac  | 6   | 6 biological_process   |
| GO:0006790 sulfur compound    | 7   | 7 biological_process   |
| GO:0044403 symbiosis, encon   | 11  | 11 biological_process  |
| GO:0016746 transferase activi | 2   | 2 molecular_function   |
| GO:0016757 transferase activi | 7   | 7 molecular_function   |
| GO:0006412 translation (trans | 6   | 6 biological_process   |
| GO:0008135 translation factor | 1   | 1 molecular_function   |
| GO:0006810 transport (transp  | 86  | 125 biological_process |
| GO:0030705 cytoskeleton-dep   | 2   | 2 biological_process   |
| GO:0006913 nucleocytoplasr    | 10  | 10 biological_process  |
| GO:0006605 protein targeting  | 9   | 9 biological_process   |
| GO:0008565 protein transport  | 1   | 1 molecular_function   |
| GO:0055085 transmembrane      | 35  | 47 biological_process  |
| GO:0022857 transmembrane      | 37  | 37 molecular_function  |
| GO:0016192 vesicle-mediatec   | 47  | 47 biological_process  |
| GO:0032196 transposition (tra | 1   | 1 biological_process   |
| GO:0005575 cellular_compone   | 211 | 406 cellular_component |
| GO:0005623 cell (cell)        | 54  | 343 cellular_component |
| GO:0005737 cytoplasm (cytop   | 119 | 221 cellular_component |
| GO:0016023 cytoplasmic mer    | 25  | 25 cellular_component  |
| GO:0005783 endoplasmic reti   | 39  | 39 cellular_component  |
| GO:0005768 endosome (endc     | 16  | 16 cellular_component  |
| GO:0005794 Golgi apparatus    | 44  | 44 cellular_component  |

|                                  |     |                        |
|----------------------------------|-----|------------------------|
| GO:0005739 mitochondrion (r      | 39  | 39 cellular_component  |
| GO:0005777 peroxisome (per       | 1   | 1 cellular_component   |
| GO:0005840 ribosome (ribosc      | 1   | 1 cellular_component   |
| GO:0005773 vacuole (vacuole      | 0   | 9 cellular_component   |
| GO:0005764 lysosome (lysos       | 9   | 9 cellular_component   |
| GO:0005829 cytosol (cytosol)     | 62  | 62 cellular_component  |
| GO:0005576 extracellular regio   | 75  | 98 cellular_component  |
| GO:0005615 extracellular spac    | 44  | 44 cellular_component  |
| GO:0005622 intracellular (intra  | 69  | 282 cellular_component |
| GO:0005694 chromosome (chr       | 7   | 8 cellular_component   |
| GO:0000228 nuclear chromo:       | 4   | 4 cellular_component   |
| GO:0005929 cilium (cilium)       | 3   | 3 cellular_component   |
| GO:0005856 cytoskeleton (cy      | 44  | 50 cellular_component  |
| GO:0005634 nucleus (nucleus      | 97  | 106 cellular_component |
| GO:0005730 nucleolus (nucle      | 9   | 9 cellular_component   |
| GO:0005811 lipid particle (lipid | 2   | 2 cellular_component   |
| GO:0005815 microtubule orga      | 7   | 7 cellular_component   |
| GO:0005635 nuclear envelope      | 5   | 5 cellular_component   |
| GO:0005654 nucleoplasm (nuc      | 10  | 10 cellular_component  |
| GO:0043226 organelle (organe     | 33  | 238 cellular_component |
| GO:0005886 plasma membrar        | 139 | 139 cellular_component |
| GO:0043234 protein complex (     | 56  | 56 cellular_component  |
| GO:0005578 proteinaceous ex      | 28  | 28 cellular_component  |
| GO:0003674 molecular_funcio      | 322 | 401 molecular_function |
| GO:0008092 cytoskeletal prote    | 19  | 19 molecular_function  |
| GO:0003677 DNA binding (DN       | 56  | 56 molecular_function  |
| GO:0019899 enzyme binding (      | 35  | 35 molecular_function  |
| GO:0042393 histone binding (l    | 1   | 1 molecular_function   |
| GO:0043167 ion binding (ion b    | 163 | 163 molecular_function |
| GO:0008289 lipid binding (lipic  | 23  | 23 molecular_function  |

|                               |    |                       |
|-------------------------------|----|-----------------------|
| GO:0030674 protein binding, b | 3  | 3 molecular_function  |
| GO:0003723 RNA binding (RN    | 7  | 8 molecular_function  |
| GO:0003729 mRNA binding (r    | 1  | 1 molecular_function  |
| GO:0032182 small conjugating  | 1  | 1 molecular_function  |
| GO:0005198 structural molecu  | 20 | 20 molecular_function |
| GO:0008134 transcription fact | 15 | 15 molecular_function |
| GO:0051082 unfolded protein   | 1  | 1 molecular_function  |

**(d)**

|                                  |    |                       |
|----------------------------------|----|-----------------------|
| GO:0008150 biological_process    | 43 | 77 biological_process |
| GO:0048856 anatomical struct     | 22 | 27 biological_process |
| GO:0048646 anatomical struct     | 9  | 9 biological_process  |
| GO:0009058 biosynthetic proce    | 17 | 20 biological_process |
| GO:0005975 carbohydrate met      | 5  | 5 biological_process  |
| GO:0009056 catabolic process     | 3  | 14 biological_process |
| GO:0034655 nucleobase-conta      | 3  | 11 biological_process |
| GO:0016887 ATPase activity (     | 5  | 5 molecular_function  |
| GO:0003924 GTPase activity (     | 5  | 5 molecular_function  |
| GO:0007155 cell adhesion (cell   | 7  | 7 biological_process  |
| GO:0007049 cell cycle (cell cycl | 6  | 6 biological_process  |
| GO:0008219 cell death (cell de   | 12 | 12 biological_process |
| GO:0030154 cell differentiation  | 23 | 23 biological_process |
| GO:0051301 cell division (cell c | 1  | 1 biological_process  |
| GO:0034330 cell junction organ   | 2  | 2 biological_process  |
| GO:0000902 cell morphogenes      | 9  | 9 biological_process  |
| GO:0048870 cell motility (cell r | 8  | 8 biological_process  |
| GO:0008283 cell proliferation (  | 12 | 12 biological_process |
| GO:0007267 cell-cell signaling ( | 5  | 5 biological_process  |
| GO:0022607 cellular componen     | 5  | 11 biological_process |
| GO:0065003 macromolecular        | 1  | 8 biological_process  |

|                                  |    |                       |
|----------------------------------|----|-----------------------|
| GO:0006461 protein complex       | 7  | 7 biological_process  |
| GO:0034641 cellular nitrogen c   | 15 | 27 biological_process |
| GO:0006259 DNA metabolic p       | 2  | 2 biological_process  |
| GO:0004518 nuclease activity     | 2  | 2 molecular_function  |
| GO:0006464 cellular protein m    | 17 | 17 biological_process |
| GO:0051276 chromosome orga       | 2  | 2 biological_process  |
| GO:0007059 chromosome segr       | 1  | 1 biological_process  |
| GO:0003013 circulatory system    | 5  | 5 biological_process  |
| GO:0051186 cofactor metaboli     | 2  | 2 biological_process  |
| GO:0007010 cytoskeleton orga     | 8  | 8 biological_process  |
| GO:0021700 developmental m       | 4  | 4 biological_process  |
| GO:0009790 embryo developr       | 6  | 6 biological_process  |
| GO:0030234 enzyme regulator      | 4  | 4 molecular_function  |
| GO:0030198 extracellular matr    | 5  | 5 biological_process  |
| GO:0006091 generation of pre     | 2  | 2 biological_process  |
| GO:0040007 growth (growth)       | 5  | 5 biological_process  |
| GO:0004386 helicase activity (l  | 1  | 1 molecular_function  |
| GO:0042592 homeostatic proc      | 9  | 9 biological_process  |
| GO:0016810 hydrolase activity    | 1  | 1 molecular_function  |
| GO:0002376 immune system p       | 10 | 10 biological_process |
| GO:0016301 kinase activity (kir  | 11 | 11 molecular_function |
| GO:0016874 ligase activity (liga | 1  | 1 molecular_function  |
| GO:0006629 lipid metabolic pr    | 7  | 7 biological_process  |
| GO:0040011 locomotion (locor     | 4  | 10 biological_process |
| GO:0016829 lyase activity (lyas  | 3  | 3 molecular_function  |
| GO:0061024 membrane organi       | 6  | 6 biological_process  |
| GO:0008168 methyltransferase     | 1  | 1 molecular_function  |
| GO:0007005 mitochondrion or      | 1  | 1 biological_process  |
| GO:0007067 mitosis (mitosis)     | 1  | 1 biological_process  |
| GO:0050877 neurological syste    | 6  | 6 biological_process  |

|                                |    |                       |
|--------------------------------|----|-----------------------|
| GO:0001071 nucleic acid bindi  | 7  | 7 molecular_function  |
| GO:0016779 nucleotidyltransfe  | 1  | 1 molecular_function  |
| GO:0016491 oxidoreductase ac   | 2  | 2 molecular_function  |
| GO:0008233 peptidase activity  | 7  | 7 molecular_function  |
| GO:0016791 phosphatase activi  | 3  | 3 molecular_function  |
| GO:0000988 protein binding tr  | 2  | 2 molecular_function  |
| GO:0006457 protein folding (p  | 1  | 1 biological_process  |
| GO:0051604 protein maturatio   | 2  | 2 biological_process  |
| GO:0000003 reproduction (rep   | 11 | 11 biological_process |
| GO:0006950 response to stres   | 16 | 16 biological_process |
| GO:0007165 signal transductio  | 26 | 27 biological_process |
| GO:0004871 signal transducer   | 10 | 10 molecular_function |
| GO:0044281 small molecule m    | 14 | 22 biological_process |
| GO:0006520 cellular amino ac   | 1  | 1 biological_process  |
| GO:0006790 sulfur compound     | 1  | 1 biological_process  |
| GO:0044403 symbiosis, encom    | 1  | 1 biological_process  |
| GO:0016757 transferase activit | 3  | 3 molecular_function  |
| GO:0006810 transport (transp   | 18 | 22 biological_process |
| GO:0030705 cytoskeleton-dep    | 1  | 1 biological_process  |
| GO:0006913 nucleocytoplasm     | 3  | 3 biological_process  |
| GO:0006605 protein targeting   | 3  | 3 biological_process  |
| GO:0055085 transmembrane t     | 6  | 11 biological_process |
| GO:0022857 transmembrane       | 11 | 11 molecular_function |
| GO:0016192 vesicle-mediated    | 7  | 7 biological_process  |
| GO:0005575 cellular_componen   | 40 | 80 cellular_component |
| GO:0005623 cell (cell)         | 9  | 61 cellular_component |
| GO:0005737 cytoplasm (cytopl   | 23 | 38 cellular_component |
| GO:0016023 cytoplasmic merr    | 3  | 3 cellular_component  |
| GO:0005783 endoplasmic retic   | 8  | 8 cellular_component  |
| GO:0005768 endosome (endo      | 2  | 2 cellular_component  |



|                                 |    |                       |
|---------------------------------|----|-----------------------|
| GO:0005794 Golgi apparatus (    | 11 | 11 cellular_component |
| GO:0005739 mitochondrion (r     | 7  | 7 cellular_component  |
| GO:0005840 ribosome (riboso     | 1  | 1 cellular_component  |
| GO:0005773 vacuole (vacuole)    | 0  | 1 cellular_component  |
| GO:0005764 lysosome (lysosc     | 1  | 1 cellular_component  |
| GO:0005829 cytosol (cytosol)    | 13 | 13 cellular_component |
| GO:0005576 extracellular regio  | 17 | 23 cellular_component |
| GO:0005615 extracellular spac   | 9  | 9 cellular_component  |
| GO:0005622 intracellular (intra | 7  | 46 cellular_component |
| GO:0005694 chromosome (chr      | 1  | 1 cellular_component  |
| GO:0005856 cytoskeleton (cyt    | 12 | 12 cellular_component |
| GO:0005634 nucleus (nucleus)    | 17 | 20 cellular_component |
| GO:0005730 nucleolus (nucle     | 1  | 1 cellular_component  |
| GO:0005635 nuclear envelope     | 1  | 1 cellular_component  |
| GO:0005654 nucleoplasm (nuc     | 3  | 3 cellular_component  |
| GO:0043226 organelle (organe    | 9  | 41 cellular_component |
| GO:0005886 plasma membran       | 32 | 32 cellular_component |
| GO:0043234 protein complex (    | 12 | 12 cellular_component |
| GO:0005578 proteinaceous ext    | 9  | 9 cellular_component  |
| GO:0003674 molecular_functio    | 60 | 78 molecular_function |
| GO:0008092 cytoskeletal prote   | 5  | 5 molecular_function  |
| GO:0003677 DNA binding (DNA     | 10 | 10 molecular_function |
| GO:0019899 enzyme binding (e    | 6  | 6 molecular_function  |
| GO:0043167 ion binding (ion b   | 41 | 41 molecular_function |
| GO:0008289 lipid binding (lipid | 4  | 4 molecular_function  |
| GO:0005198 structural molecu    | 3  | 3 molecular_function  |
| GO:0008134 transcription fact   | 2  | 2 molecular_function  |
| GO:0051082 unfolded protein     | 1  | 1 molecular_function  |
