# Supplementary material for: Simultaneous Transcriptional Profiling of Bacteria and Their Host Cells
Source: PubMed Central journal article supplement (PMC3851178; doi:10.1371/journal.pone.0080597), 2013-12-04
Supplement: pone.0080597.s008.pdf [file pone.0080597.s008.pdf]

**Table S4.** GO-term enrichment for *Chlamydia* non-hypothetical genes at 1 hpi

|                                                                                                                                                                      |    |     |                    |
|----------------------------------------------------------------------------------------------------------------------------------------------------------------------|----|-----|--------------------|
| GO:0008150 biological_process (biological_process)                                                                                                                   | 70 | 189 | biological_process |
| GO:0048856 anatomical structure development (anatomical structure development)                                                                                       | 0  | 2   | biological_process |
| GO:0009058 biosynthetic process (biosynthetic process)                                                                                                               | 22 | 81  | biological_process |
| GO:0005975 carbohydrate metabolic process (carbohydrate metabolic process)                                                                                           | 4  | 4   | biological_process |
| GO:0009056 catabolic process (catabolic process)                                                                                                                     | 3  | 15  | biological_process |
| GO:0034655 nucleobase-containing compound catabolic process (nucleobase-containing compound catabolic process)                                                       | 4  | 12  | biological_process |
| GO:0016887 ATPase activity (ATPase activity)                                                                                                                         | 6  | 6   | molecular_function |
| GO:0003924 GTPase activity (GTPase activity)                                                                                                                         | 2  | 2   | molecular_function |
| GO:0051301 cell division (cell division)                                                                                                                             | 1  | 1   | biological_process |
| GO:0000902 cell morphogenesis (cell morphogenesis)                                                                                                                   | 2  | 2   | biological_process |
| GO:0048870 cell motility (cell motility)                                                                                                                             | 1  | 1   | biological_process |
| GO:0071554 cell wall organization or biogenesis (cell wall organization or biogenesis)                                                                               | 1  | 1   | biological_process |
| GO:0022607 cellular component assembly (cellular component assembly)                                                                                                 | 1  | 1   | biological_process |
| GO:0034641 cellular nitrogen compound metabolic process (cellular nitrogen compound metabolic process)                                                               | 25 | 43  | biological_process |
| GO:0006259 DNA metabolic process (DNA metabolic process)                                                                                                             | 1  | 1   | biological_process |
| GO:0004518 nuclease activity (nuclease activity)                                                                                                                     | 5  | 5   | molecular_function |
| GO:0006399 tRNA metabolic process (tRNA metabolic process)                                                                                                           | 7  | 7   | biological_process |
| GO:0006464 cellular protein modification process (cellular protein modification process)                                                                             | 3  | 3   | biological_process |
| GO:0051276 chromosome organization (chromosome organization)                                                                                                         | 1  | 1   | biological_process |
| GO:0051186 cofactor metabolic process (cofactor metabolic process)                                                                                                   | 3  | 3   | biological_process |
| GO:0006091 generation of precursor metabolites and energy (generation of precursor metabolites and energy)                                                           | 1  | 1   | biological_process |
| GO:0040007 growth (growth)                                                                                                                                           | 1  | 1   | biological_process |
| GO:0016810 hydrolase activity, acting on carbon-nitrogen (but not peptide) bonds (hydrolase activity, acting on carbon-nitrogen (but not peptide) bonds)             | 2  | 2   | molecular_function |
| GO:0016853 isomerase activity (isomerase activity)                                                                                                                   | 2  | 2   | molecular_function |
| GO:0016301 kinase activity (kinase activity)                                                                                                                         | 4  | 4   | molecular_function |
| GO:0016874 ligase activity (ligase activity)                                                                                                                         | 7  | 7   | molecular_function |
| GO:0006629 lipid metabolic process (lipid metabolic process)                                                                                                         | 6  | 6   | biological_process |
| GO:0040011 locomotion (locomotion)                                                                                                                                   | 0  | 1   | biological_process |
| GO:0016829 lyase activity (lyase activity)                                                                                                                           | 2  | 2   | molecular_function |
| GO:0061024 membrane organization (membrane organization)                                                                                                             | 3  | 3   | biological_process |
| GO:0008168 methyltransferase activity (methyltransferase activity)                                                                                                   | 3  | 3   | molecular_function |
| GO:0016779 nucleotidyltransferase activity (nucleotidyltransferase activity)                                                                                         | 5  | 5   | molecular_function |
| GO:0016491 oxidoreductase activity (oxidoreductase activity)                                                                                                         | 1  | 1   | molecular_function |
| GO:0008233 peptidase activity (peptidase activity)                                                                                                                   | 3  | 3   | molecular_function |
| GO:0006457 protein folding (protein folding)                                                                                                                         | 3  | 3   | biological_process |
| GO:0006950 response to stress (response to stress)                                                                                                                   | 4  | 4   | biological_process |
| GO:0044281 small molecule metabolic process (small molecule metabolic process)                                                                                       | 12 | 26  | biological_process |
| GO:0006520 cellular amino acid metabolic process (cellular amino acid metabolic process)                                                                             | 6  | 6   | biological_process |
| GO:0016765 transferase activity, transferring alkyl or aryl (other than methyl) groups (transferase activity, transferring alkyl or aryl (other than methyl) groups) | 2  | 2   | molecular_function |
| GO:0006412 translation (translation)                                                                                                                                 | 59 | 59  | biological_process |
| GO:0008135 translation factor activity, nucleic acid binding (translation factor activity, nucleic acid binding)                                                     | 4  | 4   | molecular_function |
| GO:0006810 transport (transport)                                                                                                                                     | 18 | 18  | biological_process |
| GO:0008565 protein transporter activity (protein transporter activity)                                                                                               | 5  | 5   | molecular_function |
| GO:0055085 transmembrane transport (transmembrane transport)                                                                                                         | 1  | 14  | biological_process |
| GO:0022857 transmembrane transporter activity (transmembrane transporter activity)                                                                                   | 14 | 14  | molecular_function |
| GO:0005575 cellular_component (cellular_component)                                                                                                                   | 74 | 163 | cellular_component |
| GO:0005623 cell (cell)                                                                                                                                               | 2  | 89  | cellular_component |
| GO:0005737 cytoplasm (cytoplasm)                                                                                                                                     | 21 | 75  | cellular_component |
| GO:0005739 mitochondrion (mitochondrion)                                                                                                                             | 1  | 1   | cellular_component |

|                                                                                    |    |     |                    |
|------------------------------------------------------------------------------------|----|-----|--------------------|
| GO:0009536 plastid (plastid)                                                       | 9  | 9   | cellular_component |
| GO:0005840 ribosome (ribosome)                                                     | 51 | 51  | cellular_component |
| GO:0005829 cytosol (cytosol)                                                       | 6  | 6   | cellular_component |
| GO:0030312 external encapsulating structure (external encapsulating structure)     | 3  | 3   | cellular_component |
| GO:0005576 extracellular region (extracellular region)                             | 3  | 3   | cellular_component |
| GO:0005622 intracellular (intracellular)                                           | 2  | 77  | cellular_component |
| GO:0043226 organelle (organelle)                                                   | 0  | 51  | cellular_component |
| GO:0005886 plasma membrane (plasma membrane)                                       | 11 | 11  | cellular_component |
| GO:0043234 protein complex (protein complex)                                       | 13 | 13  | cellular_component |
| GO:0003674 molecular_function (molecular_function)                                 | 72 | 181 | molecular_function |
| GO:0003677 DNA binding (DNA binding)                                               | 1  | 1   | molecular_function |
| GO:0043167 ion binding (ion binding)                                               | 11 | 11  | molecular_function |
| GO:0003723 RNA binding (RNA binding)                                               | 3  | 10  | molecular_function |
| GO:0019843 rRNA binding (rRNA binding)                                             | 3  | 3   | molecular_function |
| GO:0005198 structural molecule activity (structural molecule activity)             | 2  | 53  | molecular_function |
| GO:0003735 structural constituent of ribosome (structural constituent of ribosome) | 51 | 51  | molecular_function |
