# Supplementary material for: Simultaneous Transcriptional Profiling of Bacteria and Their Host Cells
Source: PubMed Central journal article supplement (PMC3851178; doi:10.1371/journal.pone.0080597), 2013-12-04
Supplement: pone.0080597.s009.pdf [file pone.0080597.s009.pdf]

**Table S5.** (a) Human DE genes at 1 hpi (relative to mock). FDR<0.05 and LFC>2.0. Sorted by gene description. (b) Human DE genes at 24 hpi (relative to mock). FDR<0.05 and LFC>2.0. Sorted by gene description.

(a)

| Gene ID         | Feature        | Gene Symbol | Log Fold Change | Read Count (1hpi infected) | Read Count (1 hpi mock) | FDR        | Gene Description                                                                       |
|-----------------|----------------|-------------|-----------------|----------------------------|-------------------------|------------|----------------------------------------------------------------------------------------|
| ENSG00000138678 | protein_coding | AGPAT9      | 3.3522416       | 67.1676741                 | 6.577108967             | 0.01935274 | 1-acylglycerol-3-phosphate O-acyltransferase 9 [Source:HGNC Symbol;Acc:28157]          |
| ENSG00000111335 | protein_coding | OAS2        | -3.3747551      | 1.26812632                 | 13.15421793             | 0.03166038 | 2'-5'-oligoadenylate synthetase 2, 69/71kDa [Source:HGNC Symbol;Acc:8087]              |
| ENSG00000135114 | protein_coding | OASL        | -2.1204932      | 84.0964725                 | 365.6872586             | 6.0813E-06 | 2'-5'-oligoadenylate synthetase-like [Source:HGNC Symbol;Acc:8090]                     |
| ENSG00000144130 | protein_coding | NT5DC4      | -2.3837114      | 3.78083439                 | 19.7313269              | 0.02160974 | 5'-nucleotidase domain containing 4 [Source:HGNC Symbol;Acc:27678]                     |
| ENSG00000131016 | protein_coding | AKAP12      | 4.2463888       | 898.78937                  | 47.35518456             | 1.4609E-07 | A kinase (PRKA) anchor protein 12 [Source:HGNC Symbol;Acc:370]                         |
| ENSG00000173210 | protein_coding | ABLIM3      | 3.70008         | 119.67354                  | 9.207952554             | 0.0010398  | actin binding LIM protein family, member 3 [Source:HGNC Symbol;Acc:29132]              |
| ENSG00000159251 | protein_coding | ACTC1       | 4.9807722       | 124.608629                 | 3.94626538              | 2.5312E-05 | actin, alpha, cardiac muscle 1 [Source:HGNC Symbol;Acc:143]                            |
| ENSG00000151726 | protein_coding | ACSL1       | 3.8418672       | 75.4470538                 | 5.261687174             | 0.00478396 | acyl-CoA synthetase long-chain family member 1 [Source:HGNC Symbol;Acc:3569]           |
| ENSG00000148848 | protein_coding | ADAM12      | 2.8075691       | 524.931213                 | 74.97904223             | 0.00058115 | ADAM metallopeptidase domain 12 [Source:HGNC Symbol;Acc:190]                           |
| ENSG00000135074 | protein_coding | ADAM19      | 8.0814711       | 356.311824                 | 1.315421793             | 1.1129E-11 | ADAM metallopeptidase domain 19 [Source:HGNC Symbol;Acc:197]                           |
| ENSG00000149451 | protein_coding | ADAM33      | -3.3500713      | 1.41901099                 | 14.46963973             | 0.01136129 | ADAM metallopeptidase domain 33 [Source:HGNC Symbol;Acc:15478]                         |
| ENSG00000156140 | protein_coding | ADAMTS3     | Inf             | 62.453051                  | 0                       | 0.00025937 | ADAM metallopeptidase with thrombospondin type 1 motif, 3 [Source:HGNC Symbol;Acc:219] |
| ENSG00000049192 | protein_coding | ADAMTS6     | 4.2332931       | 470.074663                 | 24.99301408             | 4.8203E-07 | ADAM metallopeptidase with thrombospondin type 1 motif, 6 [Source:HGNC Symbol;Acc:222] |
| ENSG00000143382 | protein_coding | ADAMTSL4    | -2.5522796      | 23.995848                  | 140.7501319             | 4.862E-06  | ADAMTS-like 4 [Source:HGNC Symbol;Acc:19706]                                           |
| ENSG00000205696 | antisense      | ADARB2-AS1  | -3.6531796      | 4.07767875                 | 51.30144995             | 6.43E-07   | ADARB2 antisense RNA 1 (non-protein coding) [Source:HGNC Symbol;Acc:23299]             |
| ENSG00000185736 | protein_coding | ADARB2      | -4.0360689      | 23.17315                   | 380.1568983             | 0          | adenosine deaminase, RNA-specific, B2 [Source:HGNC Symbol;Acc:227]                     |
| ENSG00000185100 | protein_coding | ADSSL1      | -2.2749887      | 19.0249375                 | 92.07952554             | 0.00164694 | adenylosuccinate synthase like 1 [Source:HGNC Symbol;Acc:20093]                        |
| ENSG00000139211 | protein_coding | AMIGO2      | 2.9187338       | 1034.48645                 | 136.8038665             | 0.00030356 | adhesion molecule with Ig-like domain 2 [Source:HGNC Symbol;Acc:24073]                 |
| ENSG00000175414 | protein_coding | ARL10       | 3.0412646       | 140.773288                 | 17.10048332             | 0.00396989 | ADP-ribosylation factor-like 10 [Source:HGNC Symbol;Acc:22042]                         |
| ENSG00000185305 | protein_coding | ARL15       | 3.3096337       | 130.425966                 | 13.15421793             | 0.00193155 | ADP-ribosylation factor-like 15 [Source:HGNC Symbol;Acc:25945]                         |

|                 |                      |           |            |            |             |            |                                                                                                                                                       |
|-----------------|----------------------|-----------|------------|------------|-------------|------------|-------------------------------------------------------------------------------------------------------------------------------------------------------|
| ENSG00000175906 | protein_coding       | ARL4D     | -2.1230486 | 14.1925872 | 61.82482429 | 0.0145748  | ADP-ribosylation factor-like 4D [Source:HGNC Symbol;Acc:656]                                                                                          |
| ENSG00000150594 | protein_coding       | ADRA2A    | Inf        | 171.756442 | 0           | 8.7015E-09 | adrenoceptor alpha 2A [Source:HGNC Symbol;Acc:281]                                                                                                    |
| ENSG00000128165 | protein_coding       | ADM2      | -2.4941216 | 5.37016298 | 30.25470125 | 0.0175954  | adrenomedullin 2 [Source:HGNC Symbol;Acc:28898]                                                                                                       |
| ENSG00000166825 | protein_coding       | ANPEP     | 5.4357433  | 113.871967 | 2.630843587 | 2.0096E-05 | alanyl (membrane) aminopeptidase [Source:HGNC Symbol;Acc:500]                                                                                         |
| ENSG00000128918 | protein_coding       | ALDH1A2   | Inf        | 31.4224419 | 0           | 0.02077583 | aldehyde dehydrogenase 1 family, member A2 [Source:HGNC Symbol;Acc:15472]                                                                             |
| ENSG00000187134 | protein_coding       | AKR1C1    | -2.8016024 | 34.7149457 | 242.03761   | 6.55E-09   | aldo-keto reductase family 1, member C1 (dihydrodiol dehydrogenase 1; 20-alpha (3-alpha)-hydroxysteroid dehydrogenase) [Source:HGNC Symbol;Acc:15472] |
| ENSG00000163295 | protein_coding       | ALPI      | -3.5020583 | 165.561738 | 1875.791477 | 0          | alkaline phosphatase, intestinal [Source:HGNC Symbol;Acc:437]                                                                                         |
| ENSG00000162551 | protein_coding       | ALPL      | Inf        | 77.1630573 | 0           | 4.0343E-05 | alkaline phosphatase, liver/bone/kidney [Source:HGNC Symbol;Acc:438]                                                                                  |
| ENSG00000163283 | protein_coding       | ALPP      | -3.4311996 | 224.260484 | 2419.060678 | 0          | alkaline phosphatase, placental [Source:HGNC Symbol;Acc:439]                                                                                          |
| ENSG00000163286 | protein_coding       | ALPPL2    | -3.3950279 | 15.5053467 | 163.1123024 | 3.0216E-11 | alkaline phosphatase, placental-like 2 [Source:HGNC Symbol;Acc:441]                                                                                   |
| ENSG00000126878 | protein_coding       | AIF1L     | -2.9049319 | 13.1720893 | 98.65663451 | 7.0114E-06 | allograft inflammatory factor 1-like [Source:HGNC Symbol;Acc:28904]                                                                                   |
| ENSG00000198796 | protein_coding       | ALPK2     | -3.2929251 | 93.0098701 | 911.5873029 | 0          | alpha-kinase 2 [Source:HGNC Symbol;Acc:20565]                                                                                                         |
| ENSG00000008311 | protein_coding       | AASS      | Inf        | 48.5450412 | 0           | 0.00183687 | aminoadipate-semialdehyde synthase [Source:HGNC Symbol;Acc:17366]                                                                                     |
| ENSG00000109321 | protein_coding       | AREG      | -2.5846863 | 3.50846308 | 21.0467487  | 0.04076677 | amphiregulin [Source:HGNC Symbol;Acc:651]                                                                                                             |
| ENSG00000187151 | protein_coding       | ANGPTL5   | -2.7774745 | 2.87775064 | 19.7313269  | 0.01694232 | angiopoietin-like 5 [Source:HGNC Symbol;Acc:19705]                                                                                                    |
| ENSG00000151150 | protein_coding       | ANK3      | 4.8073692  | 36.8321749 | 1.315421793 | 0.04091653 | ankyrin 3, node of Ranvier (ankyrin G) [Source:HGNC Symbol;Acc:494]                                                                                   |
| ENSG00000159712 | processed_transcript | ANKRD18CP | -2.3004232 | 7.47698816 | 36.83181022 | 0.01552937 | ankyrin repeat domain 18C, pseudogene [Source:HGNC Symbol;Acc:43601]                                                                                  |
| ENSG00000244509 | protein_coding       | APOBEC3C  | -2.9653668 | 6.06321794 | 47.35518456 | 7.0484E-05 | apolipoprotein B mRNA editing enzyme, catalytic polypeptide-like 3C [Source:HGNC Symbol;Acc:17353]                                                    |
| ENSG00000181409 | protein_coding       | AATK      | -3.0633622 | 5.82241098 | 48.67060636 | 0.00010092 | apoptosis-associated tyrosine kinase [Source:HGNC Symbol;Acc:21]                                                                                      |
| ENSG00000130707 | protein_coding       | ASS1      | -3.6938892 | 75.9301347 | 982.6200797 | 0          | argininosuccinate synthase 1 [Source:HGNC Symbol;Acc:758]                                                                                             |
| ENSG00000184867 | protein_coding       | ARMCX2    | Inf        | 311.675976 | 0           | 3.772E-12  | armadillo repeat containing, X-linked 2 [Source:HGNC Symbol;Acc:16869]                                                                                |
| ENSG00000137486 | protein_coding       | ARRB1     | -2.7526027 | 13.8582188 | 93.39494734 | 2.9123E-05 | arrestin, beta 1 [Source:HGNC Symbol;Acc:711]                                                                                                         |
| ENSG00000172379 | protein_coding       | ARNT2     | -3.5378153 | 11.7790389 | 136.8038665 | 5.7032E-11 | aryl-hydrocarbon receptor nuclear translocator 2 [Source:HGNC Symbol;Acc:16876]                                                                       |
| ENSG00000228253 | protein_coding       | J01415.25 | -2.7116792 | 47.1884945 | 309.1241215 | 3.49E-12   | ATP synthase protein 8 [Source:UniProtKB/Swiss-Prot;Acc:P03928]                                                                                       |
| ENSG00000165029 | protein_coding       | ABCA1     | Inf        | 600.933332 | 0           | 4E-15      | ATP-binding cassette, sub-family A (ABC1), member 1 [Source:HGNC Symbol;Acc:29]                                                                       |

|                 |                |           |            |            |             |            |                                                                                                   |
|-----------------|----------------|-----------|------------|------------|-------------|------------|---------------------------------------------------------------------------------------------------|
| ENSG00000167972 | protein_coding | ABCA3     | -2.5272352 | 4.79193279 | 27.62385766 | 0.01531366 | ATP-binding cassette, sub-family A (ABC1), member 3 [Source:HGNC Symbol;Acc:33]                   |
| ENSG00000023839 | protein_coding | ABCC2     | -3.5404325 | 114.637474 | 1333.837699 | 0          | ATP-binding cassette, sub-family C (CFTR/MRP), member 2 [Source:HGNC Symbol;Acc:53]               |
| ENSG00000118777 | protein_coding | ABCG2     | -2.6405825 | 16.4537578 | 102.6028999 | 5.7508E-05 | ATP-binding cassette, sub-family G (WHITE), member 2 [Source:HGNC Symbol;Acc:74]                  |
| ENSG00000143515 | protein_coding | ATP8B2    | 3.6879474  | 440.77928  | 34.20096663 | 5.7676E-06 | ATPase, aminophospholipid transporter, class I, type 8B, member 2 [Source:HGNC Symbol;Acc:13534]  |
| ENSG00000074370 | protein_coding | ATP2A3    | 4.5854708  | 63.1624966 | 2.630843587 | 0.0041469  | ATPase, Ca++ transporting, ubiquitous [Source:HGNC Symbol;Acc:813]                                |
| ENSG00000158321 | protein_coding | AUTS2     | Inf        | 60.2776474 | 0           | 0.00050738 | autism susceptibility candidate 2 [Source:HGNC Symbol;Acc:14262]                                  |
| ENSG00000172232 | protein_coding | AZU1      | -4.4551945 | 0.53970986 | 11.83879614 | 0.00071312 | azurocidin 1 [Source:HGNC Symbol;Acc:913]                                                         |
| ENSG00000187172 | pseudogene     | BAGE2     | -3.9433045 | 6.84072445 | 105.2337435 | 4.8253E-11 | B melanoma antigen family, member 2 [Source:HGNC Symbol;Acc:15723]                                |
| ENSG00000224388 | antisense      | BACE2-IT1 | -3.5426573 | 4.51521993 | 52.61687174 | 2.6144E-06 | BACE2 intronic transcript 1 (non-protein coding) [Source:HGNC Symbol;Acc:16024]                   |
| ENSG00000104081 | protein_coding | BMF       | 2.8708477  | 115.466908 | 15.78506152 | 0.00986946 | Bcl2 modifying factor [Source:HGNC Symbol;Acc:24132]                                              |
| ENSG00000169255 | protein_coding | B3GALNT1  | Inf        | 120.323944 | 0           | 3.7786E-07 | beta-1,3-N-acetylgalactosaminyltransferase 1 (globoside blood group) [Source:HGNC Symbol;Acc:918] |
| ENSG00000197580 | protein_coding | BCO2      | -2.8191787 | 2.23660318 | 15.78506152 | 0.0309895  | beta-carotene oxygenase 2 [Source:HGNC Symbol;Acc:18503]                                          |
| ENSG00000182240 | protein_coding | BACE2     | -2.3904864 | 299.293564 | 1569.2982   | 1.9021E-10 | beta-site APP-cleaving enzyme 2 [Source:HGNC Symbol;Acc:934]                                      |
| ENSG00000112276 | protein_coding | BVES      | Inf        | 39.9653462 | 0           | 0.00712481 | blood vessel epicardial substance [Source:HGNC Symbol;Acc:1152]                                   |
| ENSG00000174672 | protein_coding | BRSK2     | -3.3894686 | 1.88288841 | 19.7313269  | 0.00229235 | BR serine/threonine kinase 2 [Source:HGNC Symbol;Acc:11405]                                       |
| ENSG00000121753 | protein_coding | BAI2      | 6.3379963  | 106.412351 | 1.315421793 | 9.7215E-06 | brain-specific angiogenesis inhibitor 2 [Source:HGNC Symbol;Acc:944]                              |
| ENSG00000233436 | protein_coding | BTBD18    | -2.1199211 | 11.49976   | 49.98602815 | 0.01410719 | BTB (POZ) domain containing 18 [Source:HGNC Symbol;Acc:37214]                                     |
| ENSG00000110852 | protein_coding | CLEC2B    | -3.173763  | 12.3904222 | 111.8108524 | 3.7786E-07 | C-type lectin domain family 2, member B [Source:HGNC Symbol;Acc:2053]                             |
| ENSG00000133466 | protein_coding | C1QTNF6   | -2.2603521 | 32.1230756 | 153.9043498 | 0.00013379 | C1q and tumor necrosis factor related protein 6 [Source:HGNC Symbol;Acc:14343]                    |
| ENSG00000081803 | protein_coding | CADPS2    | Inf        | 35.3458673 | 0           | 0.01306583 | Ca++-dependent secretion activator 2 [Source:HGNC Symbol;Acc:16018]                               |
| ENSG00000140945 | protein_coding | CDH13     | 2.9451537  | 253.270532 | 32.88554484 | 0.00106243 | cadherin 13, H-cadherin (heart) [Source:HGNC Symbol;Acc:1753]                                     |
| ENSG00000062038 | protein_coding | CDH3      | -3.5757805 | 1.65477556 | 19.7313269  | 0.0012904  | cadherin 3, type 1, P-cadherin (placental) [Source:HGNC Symbol;Acc:1762]                          |
| ENSG00000113361 | protein_coding | CDH6      | Inf        | 70.6752898 | 0           | 0.00010632 | cadherin 6, type 2, K-cadherin (fetal kidney) [Source:HGNC Symbol;Acc:1765]                       |
| ENSG00000099834 | protein_coding | CDHR5     | -2.6601696 | 8.53214138 | 53.93229353 | 0.00101853 | cadherin-related family member 5 [Source:HGNC Symbol;Acc:7521]                                    |
| ENSG00000103381 | protein_coding | CPPED1    | 5.5911106  | 63.4098932 | 1.315421793 | 0.00137345 | calcineurin-like phosphoesterase domain containing 1 [Source:HGNC Symbol;Acc:25632]               |

|                 |                |          |            |            |             |            |                                                                                                                  |
|-----------------|----------------|----------|------------|------------|-------------|------------|------------------------------------------------------------------------------------------------------------------|
| ENSG00000153956 | protein_coding | CACNA2D1 | 8.9240153  | 638.941834 | 1.315421793 | 2.3E-14    | calcium channel, voltage-dependent, alpha 2/delta subunit 1 [Source:HGNC Symbol;Acc:1399]                        |
| ENSG00000182389 | protein_coding | CACNB4   | Inf        | 37.5624915 | 0           | 0.00944115 | calcium channel, voltage-dependent, beta 4 subunit [Source:HGNC Symbol;Acc:1404]                                 |
| ENSG00000157388 | protein_coding | CACNA1D  | -4.4374088 | 0.54640465 | 11.83879614 | 0.00166901 | calcium channel, voltage-dependent, L type, alpha 1D subunit [Source:HGNC Symbol;Acc:1391]                       |
| ENSG00000162545 | protein_coding | CAMK2N1  | -3.1863346 | 1.44504952 | 13.15421793 | 0.01495304 | calcium/calmodulin-dependent protein kinase II inhibitor 1 [Source:HGNC Symbol;Acc:24190]                        |
| ENSG00000152495 | protein_coding | CAMK4    | 3.25637    | 150.838196 | 15.78506152 | 0.00163453 | calcium/calmodulin-dependent protein kinase IV [Source:HGNC Symbol;Acc:1464]                                     |
| ENSG00000153132 | protein_coding | CLGN     | 4.1797754  | 95.3592416 | 5.261687174 | 0.00066881 | calmegin [Source:HGNC Symbol;Acc:2060]                                                                           |
| ENSG00000117519 | protein_coding | CNN3     | 5.7706021  | 359.053655 | 6.577108967 | 1.3033E-09 | calponin 3, acidic [Source:HGNC Symbol;Acc:2157]                                                                 |
| ENSG00000107159 | protein_coding | CA9      | -2.1038309 | 19.5852358 | 84.18699478 | 0.00264283 | carbonic anhydrase IX [Source:HGNC Symbol;Acc:1383]                                                              |
| ENSG00000174990 | protein_coding | CA5A     | Inf        | 46.0604251 | 0           | 0.00238782 | carbonic anhydrase VA, mitochondrial [Source:HGNC Symbol;Acc:1377]                                               |
| ENSG00000074410 | protein_coding | CA12     | 5.4109765  | 335.801399 | 7.892530761 | 7.9373E-09 | carbonic anhydrase XII [Source:HGNC Symbol;Acc:1371]                                                             |
| ENSG00000185015 | protein_coding | CA13     | Inf        | 29.5630723 | 0           | 0.03188714 | carbonic anhydrase XIII [Source:HGNC Symbol;Acc:14914]                                                           |
| ENSG00000128510 | protein_coding | CPA4     | -2.0099475 | 31.3531929 | 126.2804922 | 0.00262688 | carboxypeptidase A4 [Source:HGNC Symbol;Acc:15740]                                                               |
| ENSG00000137752 | protein_coding | CASP1    | -3.8330304 | 7.29180443 | 103.9183217 | 4.5602E-10 | caspase 1, apoptosis-related cysteine peptidase [Source:HGNC Symbol;Acc:1499]                                    |
| ENSG00000196954 | protein_coding | CASP4    | -2.3143441 | 121.656655 | 605.094025  | 1.0328E-07 | caspase 4, apoptosis-related cysteine peptidase [Source:HGNC Symbol;Acc:1505]                                    |
| ENSG00000204397 | protein_coding | CARD16   | -3.5369356 | 1.47327791 | 17.10048332 | 0.00144972 | caspase recruitment domain family, member 16 [Source:HGNC Symbol;Acc:33701]                                      |
| ENSG00000179862 | protein_coding | CITED4   | -2.9179522 | 30.4587412 | 230.1988139 | 8.5314E-10 | Cbp/p300-interacting transactivator, with Glu/Asp-rich carboxy-terminal domain, 4 [Source:HGNC Symbol;Acc:18696] |
| ENSG00000012124 | protein_coding | CD22     | -3.2056934 | 1.42578868 | 13.15421793 | 0.01307154 | CD22 molecule [Source:HGNC Symbol;Acc:1643]                                                                      |
| ENSG00000135218 | protein_coding | CD36     | -2.6604656 | 4.57728309 | 28.93927946 | 0.01023343 | CD36 molecule (thrombospondin receptor) [Source:HGNC Symbol;Acc:1663]                                            |
| ENSG00000182985 | protein_coding | CADM1    | Inf        | 32.8218226 | 0           | 0.02005857 | cell adhesion molecule 1 [Source:HGNC Symbol;Acc:5951]                                                           |
| ENSG00000172292 | protein_coding | CERS6    | 3.0983403  | 270.376944 | 31.57012304 | 0.00046624 | ceramide synthase 6 [Source:HGNC Symbol;Acc:23826]                                                               |
| ENSG00000108691 | protein_coding | CCL2     | 3.6465577  | 49.4207728 | 3.94626538  | 0.03476347 | chemokine (C-C motif) ligand 2 [Source:HGNC Symbol;Acc:10618]                                                    |
| ENSG00000161570 | protein_coding | CCL5     | -3.1456899 | 4.31038458 | 38.14723201 | 0.00013056 | chemokine (C-C motif) ligand 5 [Source:HGNC Symbol;Acc:10632]                                                    |
| ENSG00000163739 | protein_coding | CXCL1    | Inf        | 140.454748 | 0           | 6.2183E-08 | chemokine (C-X-C motif) ligand 1 (melanoma growth stimulating activity, alpha) [Source:HGNC Symbol;Acc:4602]     |
| ENSG00000144476 | protein_coding | CXCR7    | 2.3771273  | 539.857004 | 103.9183217 | 0.00412006 | chemokine (C-X-C motif) receptor 7 [Source:HGNC Symbol;Acc:23692]                                                |
| ENSG00000155962 | protein_coding | CLIC2    | Inf        | 37.7081989 | 0           | 0.00939541 | chloride intracellular channel 2 [Source:HGNC Symbol;Acc:2063]                                                   |

|                 |                |          |            |            |             |            |                                                                                          |
|-----------------|----------------|----------|------------|------------|-------------|------------|------------------------------------------------------------------------------------------|
| ENSG00000135902 | protein_coding | CHRNA3   | -3.1101279 | 1.21874604 | 10.52337435 | 0.01731728 | cholinergic receptor, nicotinic, delta (muscle) [Source:HGNC Symbol;Acc:1965]            |
| ENSG00000100399 | protein_coding | CHADL    | -3.6719368 | 0.92884754 | 11.83879614 | 0.00627875 | chondroadherin-like [Source:HGNC Symbol;Acc:25165]                                       |
| ENSG00000198108 | protein_coding | CHSY3    | 5.7628429  | 142.851099 | 2.630843587 | 1.9837E-06 | chondroitin sulfate synthase 3 [Source:HGNC Symbol;Acc:24293]                            |
| ENSG00000166446 | protein_coding | CDYL2    | -2.4796731 | 67.4489317 | 376.2106329 | 1.014E-08  | chromodomain protein, Y-like 2 [Source:HGNC Symbol;Acc:23030]                            |
| ENSG00000182795 | protein_coding | C1orf116 | -2.518494  | 9.8716843  | 56.56313712 | 0.00049845 | chromosome 1 open reading frame 116 [Source:HGNC Symbol;Acc:28667]                       |
| ENSG00000239887 | protein_coding | C1orf226 | -2.6386507 | 5.06947826 | 31.57012304 | 0.00918516 | chromosome 1 open reading frame 226 [Source:HGNC Symbol;Acc:34351]                       |
| ENSG00000148426 | protein_coding | C10orf47 | -2.1478678 | 27.3073927 | 121.018805  | 0.00082869 | chromosome 10 open reading frame 47 [Source:HGNC Symbol;Acc:23728]                       |
| ENSG00000166780 | protein_coding | C16orf45 | 2.8884241  | 126.622441 | 17.10048332 | 0.00599504 | chromosome 16 open reading frame 45 [Source:HGNC Symbol;Acc:19213]                       |
| ENSG00000168675 | protein_coding | C18orf1  | 5.9226313  | 239.37344  | 3.94626538  | 2.6499E-08 | chromosome 18 open reading frame 1 [Source:HGNC Symbol;Acc:1224]                         |
| ENSG00000183397 | protein_coding | C19orf71 | -2.1003978 | 49.6932405 | 213.0983305 | 0.00014714 | chromosome 19 open reading frame 71 [Source:HGNC Symbol;Acc:34496]                       |
| ENSG00000178803 | protein_coding | C22orf45 | -3.5745097 | 1.21457144 | 14.46963973 | 0.00465126 | chromosome 22 open reading frame 45 [Source:HGNC Symbol;Acc:37122]                       |
| ENSG00000163633 | protein_coding | C4orf36  | -2.589632  | 17.7008096 | 106.5491653 | 8.5046E-05 | chromosome 4 open reading frame 36 [Source:HGNC Symbol;Acc:28386]                        |
| ENSG00000197261 | protein_coding | C6orf141 | Inf        | 68.1128332 | 0           | 0.00012513 | chromosome 6 open reading frame 141 [Source:HGNC Symbol;Acc:21351]                       |
| ENSG00000250733 | protein_coding | C8orf17  | -2.8241355 | 2.22893177 | 15.78506152 | 0.02590059 | chromosome 8 open reading frame 17 [Source:HGNC Symbol;Acc:17737]                        |
| ENSG00000168333 | protein_coding | C8orf22  | -3.2423039 | 3.61416226 | 34.20096663 | 0.00010632 | chromosome 8 open reading frame 22 [Source:HGNC Symbol;Acc:31745]                        |
| ENSG00000176907 | protein_coding | C8orf4   | 2.7364201  | 394.477355 | 59.19398071 | 0.0008401  | chromosome 8 open reading frame 4 [Source:HGNC Symbol;Acc:1357]                          |
| ENSG00000184785 | protein_coding | CXorf69  | -2.1538113 | 11.8239672 | 52.61687174 | 0.02018924 | chromosome X open reading frame 69 [Source:HGNC Symbol;Acc:41913]                        |
| ENSG00000181885 | protein_coding | CLDN7    | -2.9418459 | 3.7662041  | 28.93927946 | 0.00607178 | claudin 7 [Source:HGNC Symbol;Acc:2049]                                                  |
| ENSG00000120885 | protein_coding | CLU      | 2.8300252  | 832.487092 | 117.0725396 | 0.00035424 | clusterin [Source:HGNC Symbol;Acc:2095]                                                  |
| ENSG00000100473 | protein_coding | COCH     | 4.1387824  | 46.3439096 | 2.630843587 | 0.02746169 | coagulation factor C homolog, cochlin (Limulus polyphemus) [Source:HGNC Symbol;Acc:2180] |
| ENSG00000168542 | protein_coding | COL3A1   | 3.5559077  | 897.279856 | 76.29446402 | 6.3204E-06 | collagen, type III, alpha 1 [Source:HGNC Symbol;Acc:2201]                                |
| ENSG00000187498 | protein_coding | COL4A1   | 2.5267015  | 1917.77867 | 332.8017137 | 0.00587294 | collagen, type IV, alpha 1 [Source:HGNC Symbol;Acc:2202]                                 |
| ENSG00000134871 | protein_coding | COL4A2   | 2.229936   | 2264.6898  | 482.7597982 | 0.02473098 | collagen, type IV, alpha 2 [Source:HGNC Symbol;Acc:2203]                                 |
| ENSG00000130635 | protein_coding | COL5A1   | 2.5880967  | 2452.00562 | 407.780756  | 0.00822715 | collagen, type V, alpha 1 [Source:HGNC Symbol;Acc:2209]                                  |
| ENSG00000080573 | protein_coding | COL5A3   | 5.4815565  | 58.7730138 | 1.315421793 | 0.00212304 | collagen, type V, alpha 3 [Source:HGNC Symbol;Acc:14864]                                 |

|                 |                |          |            |            |             |            |                                                                                                                  |
|-----------------|----------------|----------|------------|------------|-------------|------------|------------------------------------------------------------------------------------------------------------------|
| ENSG00000204291 | protein_coding | COL15A1  | -2.6203074 | 170.717015 | 1049.706591 | 2.513E-12  | collagen, type XV, alpha 1 [Source:HGNC Symbol;Acc:2192]                                                         |
| ENSG00000084636 | protein_coding | COL16A1  | 2.7571361  | 142.287152 | 21.0467487  | 0.00784127 | collagen, type XVI, alpha 1 [Source:HGNC Symbol;Acc:2193]                                                        |
| ENSG00000188517 | protein_coding | COL25A1  | Inf        | 189.610865 | 0           | 2.3792E-09 | collagen, type XXV, alpha 1 [Source:HGNC Symbol;Acc:18603]                                                       |
| ENSG00000198223 | protein_coding | CSF2RA   | -2.9714646 | 10.7335909 | 84.18699478 | 1.6453E-05 | colony stimulating factor 2 receptor, alpha, low-affinity (granulocyte-macrophage) [Source:HGNC Symbol;Acc:2435] |
| ENSG00000123843 | protein_coding | C4BPB    | -3.3577113 | 97.0096638 | 994.4588759 | 0          | complement component 4 binding protein, beta [Source:HGNC Symbol;Acc:1328]                                       |
| ENSG00000224389 | protein_coding | C4B      | -3.6086789 | 4.20541672 | 51.30144995 | 7.5085E-06 | complement component 4B (Chido blood group) [Source:HGNC Symbol;Acc:1324]                                        |
| ENSG00000000971 | protein_coding | CFH      | 3.0521027  | 207.297045 | 24.99301408 | 0.00092909 | complement factor H [Source:HGNC Symbol;Acc:4883]                                                                |
| ENSG00000152910 | protein_coding | CNTNAP4  | -3.6033388 | 7.35971287 | 89.44868196 | 4.6558E-09 | contactin associated protein-like 4 [Source:HGNC Symbol;Acc:18747]                                               |
| ENSG00000163814 | protein_coding | CDCP1    | 2.2109603  | 572.477282 | 123.6496486 | 0.0112139  | CUB domain containing protein 1 [Source:HGNC Symbol;Acc:24357]                                                   |
| ENSG00000070729 | protein_coding | CNGB1    | -3.8191249 | 1.58431962 | 22.36217049 | 0.00010768 | cyclic nucleotide gated channel beta 1 [Source:HGNC Symbol;Acc:2151]                                             |
| ENSG00000116761 | protein_coding | CTH      | -2.2271359 | 42.9854764 | 201.2595344 | 0.00010543 | cystathionase (cystathionine gamma-lyase) [Source:HGNC Symbol;Acc:2501]                                          |
| ENSG00000182809 | protein_coding | CRIP2    | 4.099887   | 135.333476 | 7.892530761 | 0.00010754 | cysteine-rich protein 2 [Source:HGNC Symbol;Acc:2361]                                                            |
| ENSG00000121005 | protein_coding | CRISPLD1 | 5.935664   | 80.5152125 | 1.315421793 | 0.00015335 | cysteine-rich secretory protein LCCL domain containing 1 [Source:HGNC Symbol;Acc:18206]                          |
| ENSG00000140459 | protein_coding | CYP11A1  | -2.8467768 | 2.92563272 | 21.0467487  | 0.00715152 | cytochrome P450, family 11, subfamily A, polypeptide 1 [Source:HGNC Symbol;Acc:2590]                             |
| ENSG00000019186 | protein_coding | CYP24A1  | 5.8942156  | 78.2349383 | 1.315421793 | 0.00019289 | cytochrome P450, family 24, subfamily A, polypeptide 1 [Source:HGNC Symbol;Acc:2602]                             |
| ENSG00000006016 | protein_coding | CRLF1    | Inf        | 312.84185  | 0           | 3.318E-12  | cytokine receptor-like factor 1 [Source:HGNC Symbol;Acc:2364]                                                    |
| ENSG00000055163 | protein_coding | CYFIP2   | Inf        | 75.7399717 | 0           | 4.9067E-05 | cytoplasmic FMR1 interacting protein 2 [Source:HGNC Symbol;Acc:13760]                                            |
| ENSG00000165617 | protein_coding | DACT1    | Inf        | 35.9108613 | 0           | 0.01307154 | dapper, antagonist of beta-catenin, homolog 1 (Xenopus laevis) [Source:HGNC Symbol;Acc:17748]                    |
| ENSG00000196730 | protein_coding | DAPK1    | -2.9765955 | 44.9544601 | 353.8484624 | 1.653E-12  | death-associated protein kinase 1 [Source:HGNC Symbol;Acc:2674]                                                  |
| ENSG00000011465 | protein_coding | DCN      | -3.6512346 | 19.9971112 | 251.2455626 | 2E-14      | decorin [Source:HGNC Symbol;Acc:2705]                                                                            |
| ENSG00000134516 | protein_coding | DOCK2    | Inf        | 49.7108541 | 0           | 0.0017722  | dedicator of cytokinesis 2 [Source:HGNC Symbol;Acc:2988]                                                         |
| ENSG00000181192 | protein_coding | DHTKD1   | -2.1438635 | 90.7815592 | 401.203647  | 1.7764E-06 | dehydrogenase E1 and transketolase domain containing 1 [Source:HGNC Symbol;Acc:23537]                            |
| ENSG00000187908 | protein_coding | DMBT1    | 5.481503   | 58.7708361 | 1.315421793 | 0.00229235 | deleted in malignant brain tumors 1 [Source:HGNC Symbol;Acc:2926]                                                |
| ENSG00000187957 | protein_coding | DNER     | 2.0786296  | 188.918199 | 44.72434098 | 0.04352558 | delta/notch-like EGF repeat containing [Source:HGNC Symbol;Acc:24456]                                            |
| ENSG00000110042 | protein_coding | DTX4     | -2.1744367 | 20.1068234 | 90.76410375 | 0.00163453 | deltex homolog 4 (Drosophila) [Source:HGNC Symbol;Acc:29151]                                                     |

|                 |                |        |            |            |             |            |                                                                                  |
|-----------------|----------------|--------|------------|------------|-------------|------------|----------------------------------------------------------------------------------|
| ENSG00000161249 | protein_coding | DMKN   | -4.1334141 | 5.17169013 | 90.76410375 | 4.2964E-11 | dermokine [Source:HGNC Symbol;Acc:25063]                                         |
| ENSG00000147202 | protein_coding | DIAPH2 | Inf        | 213.353843 | 0           | 5.3161E-10 | diaphanous homolog 2 (Drosophila) [Source:HGNC Symbol;Acc:2877]                  |
| ENSG00000050165 | protein_coding | DKK3   | 3.3312064  | 92.6736195 | 9.207952554 | 0.00667165 | dickkopf 3 homolog (Xenopus laevis) [Source:HGNC Symbol;Acc:2893]                |
| ENSG00000113657 | protein_coding | DPYSL3 | 4.1539678  | 444.925753 | 24.99301408 | 6.0544E-07 | dihydropyrimidinase-like 3 [Source:HGNC Symbol;Acc:3015]                         |
| ENSG00000133083 | protein_coding | DCLK1  | Inf        | 94.7650657 | 0           | 5.9686E-06 | doublecortin-like kinase 1 [Source:HGNC Symbol;Acc:2700]                         |
| ENSG00000106976 | protein_coding | DNM1   | 3.953469   | 163.030093 | 10.52337435 | 9.8397E-05 | dynamain 1 [Source:HGNC Symbol;Acc:2972]                                         |
| ENSG00000115423 | protein_coding | DNAH6  | -2.6390719 | 2.53399919 | 15.78506152 | 0.02785441 | dynein, axonemal, heavy chain 6 [Source:HGNC Symbol;Acc:2951]                    |
| ENSG00000164330 | protein_coding | EBF1   | 6.1966742  | 96.4827883 | 1.315421793 | 2.7656E-05 | early B-cell factor 1 [Source:HGNC Symbol;Acc:3126]                              |
| ENSG00000164176 | protein_coding | EDIL3  | 2.1607817  | 1329.33233 | 297.2853253 | 0.01531366 | EGF-like repeats and discoidin I-like domains 3 [Source:HGNC Symbol;Acc:3173]    |
| ENSG00000170571 | protein_coding | EMB    | 4.0049737  | 253.433195 | 15.78506152 | 1.0197E-05 | embigin [Source:HGNC Symbol;Acc:30465]                                           |
| ENSG00000149218 | protein_coding | ENDOD1 | 5.1408659  | 92.8217754 | 2.630843587 | 0.00015271 | endonuclease domain containing 1 [Source:HGNC Symbol;Acc:29129]                  |
| ENSG00000171551 | protein_coding | ECEL1  | 5.0763979  | 44.3826323 | 1.315421793 | 0.01307154 | endothelin converting enzyme-like 1 [Source:HGNC Symbol;Acc:3147]                |
| ENSG00000108515 | protein_coding | ENO3   | 2.1688267  | 218.851057 | 48.67060636 | 0.02171043 | enolase 3 (beta, muscle) [Source:HGNC Symbol;Acc:3354]                           |
| ENSG00000214860 | protein_coding | EVPLL  | -3.194672  | 2.29875627 | 21.0467487  | 0.01258814 | envoplakin-like [Source:HGNC Symbol;Acc:35236]                                   |
| ENSG00000145242 | protein_coding | EPHA5  | Inf        | 137.142915 | 0           | 1.2488E-07 | EPH receptor A5 [Source:HGNC Symbol;Acc:3389]                                    |
| ENSG00000133216 | protein_coding | EPHB2  | 3.5132823  | 225.299194 | 19.7313269  | 0.00010517 | EPH receptor B2 [Source:HGNC Symbol;Acc:3393]                                    |
| ENSG00000125266 | protein_coding | EFNB2  | 2.3065457  | 175.698581 | 35.51638842 | 0.0247032  | ephrin-B2 [Source:HGNC Symbol;Acc:3227]                                          |
| ENSG00000124882 | protein_coding | EREG   | -2.3499931 | 443.787507 | 2262.525485 | 1.3595E-11 | epiregulin [Source:HGNC Symbol;Acc:3443]                                         |
| ENSG00000182585 | protein_coding | EPGN   | -2.5063433 | 57.4159022 | 326.2246048 | 9.2408E-08 | epithelial mitogen homolog (mouse) [Source:HGNC Symbol;Acc:17470]                |
| ENSG00000196482 | protein_coding | ESRRG  | -3.8188446 | 4.66066919 | 65.77108967 | 2.7966E-08 | estrogen-related receptor gamma [Source:HGNC Symbol;Acc:3474]                    |
| ENSG00000135373 | protein_coding | EHF    | -3.2624977 | 5.34588941 | 51.30144995 | 1.4707E-05 | ets homologous factor [Source:HGNC Symbol;Acc:3246]                              |
| ENSG00000101210 | protein_coding | EEF1A2 | 2.1011356  | 158.025771 | 36.83181022 | 0.04625777 | eukaryotic translation elongation factor 1 alpha 2 [Source:HGNC Symbol;Acc:3192] |
| ENSG00000104313 | protein_coding | EYA1   | Inf        | 34.6371877 | 0           | 0.01428001 | eyes absent homolog 1 (Drosophila) [Source:HGNC Symbol;Acc:3519]                 |
| ENSG00000116661 | protein_coding | FBXO2  | -2.8551057 | 2.90879135 | 21.0467487  | 0.01258814 | F-box protein 2 [Source:HGNC Symbol;Acc:13581]                                   |
| ENSG00000156804 | protein_coding | FBXO32 | 3.9443417  | 364.504345 | 23.67759228 | 2.7786E-06 | F-box protein 32 [Source:HGNC Symbol;Acc:16731]                                  |

|                 |                |         |            |            |             |            |                                                                              |
|-----------------|----------------|---------|------------|------------|-------------|------------|------------------------------------------------------------------------------|
| ENSG00000158769 | protein_coding | F11R    | -2.2693966 | 34.6507243 | 167.0585678 | 0.00012071 | F11 receptor [Source:HGNC Symbol;Acc:14685]                                  |
| ENSG00000177096 | protein_coding | FAM109B | 5.4382992  | 57.0369395 | 1.315421793 | 0.00253062 | family with sequence similarity 109, member B [Source:HGNC Symbol;Acc:27161] |
| ENSG00000135842 | protein_coding | FAM129A | -2.0837116 | 30.4110496 | 128.9113358 | 0.00076989 | family with sequence similarity 129, member A [Source:HGNC Symbol;Acc:16784] |
| ENSG00000154319 | protein_coding | FAM167A | -2.8712414 | 3.05621685 | 22.36217049 | 0.0093871  | family with sequence similarity 167, member A [Source:HGNC Symbol;Acc:15549] |
| ENSG00000144369 | protein_coding | FAM171B | 2.7861727  | 208.696137 | 30.25470125 | 0.00285713 | family with sequence similarity 171, member B [Source:HGNC Symbol;Acc:29412] |
| ENSG00000204767 | protein_coding | FAM196B | Inf        | 42.2697899 | 0           | 0.00568219 | family with sequence similarity 196, member B [Source:HGNC Symbol;Acc:37271] |
| ENSG00000185112 | protein_coding | FAM43A  | 3.406315   | 69.7329471 | 6.577108967 | 0.01545641 | family with sequence similarity 43, member A [Source:HGNC Symbol;Acc:26888]  |
| ENSG00000183508 | protein_coding | FAM46C  | -2.94171   | 12.840542  | 98.65663451 | 1.4394E-06 | family with sequence similarity 46, member C [Source:HGNC Symbol;Acc:24712]  |
| ENSG00000162670 | protein_coding | FAM5C   | -4.1286851 | 3.08312296 | 53.93229353 | 2.3016E-08 | family with sequence similarity 5, member C [Source:HGNC Symbol;Acc:22393]   |
| ENSG00000145945 | protein_coding | FAM50B  | 5.1433125  | 46.4896599 | 1.315421793 | 0.01064152 | family with sequence similarity 50, member B [Source:HGNC Symbol;Acc:18789]  |
| ENSG00000126882 | protein_coding | FAM78A  | -4.0212326 | 2.9164592  | 47.35518456 | 3.0824E-07 | family with sequence similarity 78, member A [Source:HGNC Symbol;Acc:25465]  |
| ENSG00000147689 | protein_coding | FAM83A  | -2.6827357 | 23.7650705 | 152.588928  | 1.2505E-06 | family with sequence similarity 83, member A [Source:HGNC Symbol;Acc:28210]  |
| ENSG00000168672 | protein_coding | FAM84B  | -3.2772495 | 16.8242732 | 163.1123024 | 4.5602E-10 | family with sequence similarity 84, member B [Source:HGNC Symbol;Acc:24166]  |
| ENSG00000177138 | protein_coding | FAM9B   | -2.674409  | 2.06057151 | 13.15421793 | 0.04531521 | family with sequence similarity 9, member B [Source:HGNC Symbol;Acc:18404]   |
| ENSG00000170345 | protein_coding | FOS     | -2.1098214 | 202.050077 | 872.1246491 | 8.8828E-08 | FBJ murine osteosarcoma viral oncogene homolog [Source:HGNC Symbol;Acc:3796] |
| ENSG00000114279 | protein_coding | FGF12   | 5.3218706  | 52.6147737 | 1.315421793 | 0.00514925 | fibroblast growth factor 12 [Source:HGNC Symbol;Acc:3668]                    |
| ENSG00000137440 | protein_coding | FGFBP1  | -2.908439  | 3.67923003 | 27.62385766 | 0.00528015 | fibroblast growth factor binding protein 1 [Source:HGNC Symbol;Acc:19695]    |
| ENSG00000164694 | protein_coding | FNDC1   | Inf        | 46.50841   | 0           | 0.00281586 | fibronectin type III domain containing 1 [Source:HGNC Symbol;Acc:21184]      |
| ENSG00000188738 | protein_coding | FSIP2   | 3.1274601  | 172.431093 | 19.7313269  | 0.00146224 | fibrous sheath interacting protein 2 [Source:HGNC Symbol;Acc:21675]          |
| ENSG00000140092 | protein_coding | FBLN5   | 5.2064797  | 194.281555 | 5.261687174 | 6.3612E-07 | fibulin 5 [Source:HGNC Symbol;Acc:3602]                                      |
| ENSG00000128591 | protein_coding | FLNC    | 4.0173248  | 213.010151 | 13.15421793 | 2.0608E-05 | filamin C, gamma [Source:HGNC Symbol;Acc:3756]                               |
| ENSG00000110195 | protein_coding | FOLR1   | 9.63464    | 1045.63632 | 1.315421793 | 0          | folate receptor 1 (adult) [Source:HGNC Symbol;Acc:3791]                      |
| ENSG00000053108 | protein_coding | FSTL4   | 2.7007834  | 410.509368 | 63.14024609 | 0.00115727 | follicle-stimulating hormone-like 4 [Source:HGNC Symbol;Acc:21389]           |
| ENSG00000176678 | protein_coding | FOXL1   | Inf        | 130.678225 | 0           | 1.8418E-07 | forkhead box L1 [Source:HGNC Symbol;Acc:3817]                                |
| ENSG00000248905 | protein_coding | FMN1    | 4.1519156  | 187.070871 | 10.52337435 | 3.0361E-05 | formin 1 [Source:HGNC Symbol;Acc:3768]                                       |



|                 |                |         |            |            |             |            |                                                                                                       |
|-----------------|----------------|---------|------------|------------|-------------|------------|-------------------------------------------------------------------------------------------------------|
| ENSG00000155816 | protein_coding | FMN2    | Inf        | 61.7418251 | 0           | 0.0002285  | formin 2 [Source:HGNC Symbol;Acc:14074]                                                               |
| ENSG00000134775 | protein_coding | FHOD3   | 4.1216027  | 68.6929756 | 3.94626538  | 0.00624447 | formin homology 2 domain containing 3 [Source:HGNC Symbol;Acc:26178]                                  |
| ENSG00000111432 | protein_coding | FZD10   | -2.7171892 | 30.8056436 | 202.5749562 | 1.7692E-07 | frizzled family receptor 10 [Source:HGNC Symbol;Acc:4039]                                             |
| ENSG00000196371 | protein_coding | FUT4    | Inf        | 70.9873375 | 0           | 0.00011175 | fucosyltransferase 4 (alpha (1,3) fucosyltransferase, myeloid-specific) [Source:HGNC Symbol;Acc:4015] |
| ENSG00000102302 | protein_coding | FGD1    | -2.0546587 | 31.6629322 | 131.5421793 | 0.0017722  | FYVE, RhoGEF and PH domain containing 1 [Source:HGNC Symbol;Acc:3663]                                 |
| ENSG00000111452 | protein_coding | GPR133  | Inf        | 65.2916152 | 0           | 0.00016524 | G protein-coupled receptor 133 [Source:HGNC Symbol;Acc:19893]                                         |
| ENSG00000166073 | protein_coding | GPR176  | 2.5842312  | 354.98389  | 59.19398071 | 0.00264283 | G protein-coupled receptor 176 [Source:HGNC Symbol;Acc:32370]                                         |
| ENSG00000205336 | protein_coding | GPR56   | 3.6959342  | 204.56594  | 15.78506152 | 6.1209E-05 | G protein-coupled receptor 56 [Source:HGNC Symbol;Acc:4512]                                           |
| ENSG00000099998 | protein_coding | GGT5    | -3.7624551 | 2.52015089 | 34.20096663 | 9.9166E-06 | gamma-glutamyltransferase 5 [Source:HGNC Symbol;Acc:4260]                                             |
| ENSG00000152661 | protein_coding | GJA1    | Inf        | 173.19351  | 0           | 5.7484E-09 | gap junction protein, alpha 1, 43kDa [Source:HGNC Symbol;Acc:4274]                                    |
| ENSG00000139278 | protein_coding | GLIPR1  | 4.0332493  | 581.510858 | 35.51638842 | 6.6074E-07 | GLI pathogenesis-related 1 [Source:HGNC Symbol;Acc:17001]                                             |
| ENSG00000122694 | protein_coding | GLIPR2  | 5.0573422  | 43.8002643 | 1.315421793 | 0.01486073 | GLI pathogenesis-related 2 [Source:HGNC Symbol;Acc:18007]                                             |
| ENSG00000174332 | protein_coding | GLIS1   | Inf        | 29.1115416 | 0           | 0.03463254 | GLIS family zinc finger 1 [Source:HGNC Symbol;Acc:29525]                                              |
| ENSG00000187210 | protein_coding | GCNT1   | Inf        | 33.0294661 | 0           | 0.01724189 | glucosaminyl (N-acetyl) transferase 1, core 2 [Source:HGNC Symbol;Acc:4203]                           |
| ENSG00000135346 | protein_coding | CGA     | Inf        | 72.0908826 | 0           | 5.1271E-05 | glycoprotein hormones, alpha polypeptide [Source:HGNC Symbol;Acc:1885]                                |
| ENSG00000112293 | protein_coding | GPLD1   | -2.3214402 | 6.31616021 | 31.57012304 | 0.02489121 | glycosylphosphatidylinositol specific phospholipase D1 [Source:HGNC Symbol;Acc:4459]                  |
| ENSG00000185477 | protein_coding | GPRIN3  | Inf        | 44.4977465 | 0           | 0.00467125 | GPRIN family member 3 [Source:HGNC Symbol;Acc:27733]                                                  |
| ENSG00000134317 | protein_coding | GRHL1   | -3.4090267 | 1.98137068 | 21.0467487  | 0.00222449 | grainyhead-like 1 (Drosophila) [Source:HGNC Symbol;Acc:17923]                                         |
| ENSG00000023171 | protein_coding | GRAMD1B | -2.0895771 | 221.594412 | 943.1574259 | 2.4488E-07 | GRAM domain containing 1B [Source:HGNC Symbol;Acc:29214]                                              |
| ENSG00000166923 | protein_coding | GREM1   | 8.6747435  | 537.555158 | 1.315421793 | 9.7E-14    | gremlin 1 [Source:HGNC Symbol;Acc:2001]                                                               |
| ENSG00000183087 | protein_coding | GAS6    | 3.4703035  | 72.8954591 | 6.577108967 | 0.01048074 | growth arrest-specific 6 [Source:HGNC Symbol;Acc:4168]                                                |
| ENSG00000130513 | protein_coding | GDF15   | -2.7127824 | 48.7576117 | 319.6474958 | 5.3411E-09 | growth differentiation factor 15 [Source:HGNC Symbol;Acc:30142]                                       |
| ENSG00000141738 | protein_coding | GRB7    | -3.2308816 | 2.10166748 | 19.7313269  | 0.0038394  | growth factor receptor-bound protein 7 [Source:HGNC Symbol;Acc:4567]                                  |
| ENSG00000114450 | protein_coding | GNB4    | 2.0263019  | 605.509716 | 148.6426627 | 0.0226154  | guanine nucleotide binding protein (G protein), beta polypeptide 4 [Source:HGNC Symbol;Acc:20731]     |
| ENSG00000168243 | protein_coding | GNG4    | -2.7066748 | 2.41799819 | 15.78506152 | 0.0324573  | guanine nucleotide binding protein (G protein), gamma 4 [Source:HGNC Symbol;Acc:4407]                 |

|                 |                |               |            |            |             |            |                                                                                                   |
|-----------------|----------------|---------------|------------|------------|-------------|------------|---------------------------------------------------------------------------------------------------|
| ENSG00000117228 | protein_coding | GBP1          | Inf        | 223.972472 | 0           | 2.3825E-10 | guanylate binding protein 1, interferon-inducible [Source:HGNC Symbol;Acc:4182]                   |
| ENSG00000162645 | protein_coding | GBP2          | 6.6770534  | 134.604134 | 1.315421793 | 8.2507E-07 | guanylate binding protein 2, interferon-inducible [Source:HGNC Symbol;Acc:4183]                   |
| ENSG00000189060 | protein_coding | H1F0          | -2.2516325 | 89.4954859 | 426.1966611 | 2.7727E-07 | H1 histone family, member 0 [Source:HGNC Symbol;Acc:4714]                                         |
| ENSG00000130600 | lincRNA        | H19           | -3.5907888 | 1467.88046 | 17685.84601 | 0          | H19, imprinted maternally expressed transcript (non-protein coding) [Source:HGNC Symbol;Acc:4713] |
| ENSG00000152137 | protein_coding | HSPB8         | 2.4352533  | 234.781173 | 43.40891918 | 0.00750313 | heat shock 22kDa protein 8 [Source:HGNC Symbol;Acc:30171]                                         |
| ENSG00000100292 | protein_coding | HMOX1         | 2.6661861  | 275.537656 | 43.40891918 | 0.00224518 | heme oxygenase (decycling) 1 [Source:HGNC Symbol;Acc:5013]                                        |
| ENSG00000143341 | protein_coding | HMCN1         | 3.4553875  | 144.291353 | 13.15421793 | 0.00103774 | hemicentin 1 [Source:HGNC Symbol;Acc:19194]                                                       |
| ENSG00000010704 | protein_coding | HFE           | -2.2017261 | 35.4569286 | 163.1123024 | 0.00040772 | hemochromatosis [Source:HGNC Symbol;Acc:4886]                                                     |
| ENSG00000125430 | protein_coding | HS3ST3B1      | Inf        | 31.73391   | 0           | 0.02218831 | heparan sulfate (glucosamine) 3-O-sulfotransferase 3B1 [Source:HGNC Symbol;Acc:5198]              |
| ENSG00000171004 | protein_coding | HS6ST2        | 2.1765057  | 350.841157 | 77.60988581 | 0.01355901 | heparan sulfate 6-O-sulfotransferase 2 [Source:HGNC Symbol;Acc:19133]                             |
| ENSG00000185352 | protein_coding | HS6ST3        | Inf        | 32.5108944 | 0           | 0.02559833 | heparan sulfate 6-O-sulfotransferase 3 [Source:HGNC Symbol;Acc:19134]                             |
| ENSG00000113070 | protein_coding | HBEGF         | 3.4166441  | 112.374401 | 10.52337435 | 0.00249046 | heparin-binding EGF-like growth factor [Source:HGNC Symbol;Acc:3059]                              |
| ENSG00000166503 | protein_coding | RP11-382A20.3 | 3.910046   | 158.196232 | 10.52337435 | 0.00011342 | Hepatoma-derived growth factor-related protein 3 [Source:UniProtKB/Swiss-Prot;Acc:Q9Y3E1]         |
| ENSG00000156510 | protein_coding | HKDC1         | -2.7744342 | 3.46058572 | 23.67759228 | 0.01495304 | hexokinase domain containing 1 [Source:HGNC Symbol;Acc:23302]                                     |
| ENSG00000184357 | protein_coding | HIST1H1B      | 2.2320961  | 1477.03506 | 314.3858086 | 0.02142213 | histone cluster 1, H1b [Source:HGNC Symbol;Acc:4719]                                              |
| ENSG00000124575 | protein_coding | HIST1H1D      | 2.3850577  | 398.535439 | 76.29446402 | 0.00822715 | histone cluster 1, H1d [Source:HGNC Symbol;Acc:4717]                                              |
| ENSG00000198374 | protein_coding | HIST1H2AL     | 2.2937028  | 406.330047 | 82.87157299 | 0.01695515 | histone cluster 1, H2al [Source:HGNC Symbol;Acc:4730]                                             |
| ENSG00000196532 | protein_coding | HIST1H3C      | 3.1544913  | 105.415396 | 11.83879614 | 0.00950144 | histone cluster 1, H3c [Source:HGNC Symbol;Acc:4768]                                              |
| ENSG00000143452 | protein_coding | HORMAD1       | Inf        | 51.7292707 | 0           | 0.00102745 | HORMA domain containing 1 [Source:HGNC Symbol;Acc:25245]                                          |
| ENSG00000133328 | protein_coding | HRASLS2       | -3.7522299 | 1.26903806 | 17.10048332 | 0.0008102  | HRAS-like suppressor 2 [Source:HGNC Symbol;Acc:17824]                                             |
| ENSG00000166033 | protein_coding | HTRA1         | 2.0131078  | 796.456628 | 197.313269  | 0.01694232 | HtrA serine peptidase 1 [Source:HGNC Symbol;Acc:9476]                                             |
| ENSG00000173805 | protein_coding | HAP1          | -2.7918404 | 3.22913547 | 22.36217049 | 0.00538712 | huntingtin-associated protein 1 [Source:HGNC Symbol;Acc:4812]                                     |
| ENSG00000010404 | protein_coding | IDS           | 2.5309836  | 159.656395 | 27.62385766 | 0.01401613 | iduronate 2-sulfatase [Source:HGNC Symbol;Acc:5389]                                               |
| ENSG00000152580 | protein_coding | IGSF10        | 7.3499131  | 858.359725 | 5.261687174 | 1.97E-13   | immunoglobulin superfamily, member 10 [Source:HGNC Symbol;Acc:26384]                              |
| ENSG00000160223 | protein_coding | ICOSLG        | -2.9586296 | 18.1055849 | 140.7501319 | 1.8057E-07 | inducible T-cell co-stimulator ligand [Source:HGNC Symbol;Acc:17087]                              |

|                 |                |         |            |            |             |            |                                                                                                      |
|-----------------|----------------|---------|------------|------------|-------------|------------|------------------------------------------------------------------------------------------------------|
| ENSG00000139269 | protein_coding | INHBE   | -3.9606745 | 3.04148511 | 47.35518456 | 1.761E-06  | inhibin, beta E [Source:HGNC Symbol;Acc:24029]                                                       |
| ENSG00000117318 | protein_coding | ID3     | 2.1363127  | 578.30806  | 131.5421793 | 0.00978342 | inhibitor of DNA binding 3, dominant negative helix-loop-helix protein [Source:HGNC Symbol;Acc:5362] |
| ENSG00000165458 | protein_coding | INPPL1  | 2.0642114  | 1837.38878 | 439.350879  | 0.03595535 | inositol polyphosphate phosphatase-like 1 [Source:HGNC Symbol;Acc:6080]                              |
| ENSG00000068383 | protein_coding | INPP5A  | 2.253621   | 163.09697  | 34.20096663 | 0.02931601 | inositol polyphosphate-5-phosphatase, 40kDa [Source:HGNC Symbol;Acc:6076]                            |
| ENSG00000073792 | protein_coding | IGF2BP2 | -3.3707735 | 7.88411233 | 81.5561512  | 1.8469E-07 | insulin-like growth factor 2 mRNA binding protein 2 [Source:HGNC Symbol;Acc:28867]                   |
| ENSG00000115461 | protein_coding | IGFBP5  | Inf        | 37.3208435 | 0           | 0.00970791 | insulin-like growth factor binding protein 5 [Source:HGNC Symbol;Acc:5474]                           |
| ENSG00000137809 | protein_coding | ITGA11  | Inf        | 796.497857 | 0           | 0          | integrin, alpha 11 [Source:HGNC Symbol;Acc:6136]                                                     |
| ENSG00000115232 | protein_coding | ITGA4   | Inf        | 68.0226747 | 0           | 0.000134   | integrin, alpha 4 (antigen CD49D, alpha 4 subunit of VLA-4 receptor) [Source:HGNC Symbol;Acc:6140]   |
| ENSG00000185885 | protein_coding | IFITM1  | -3.2675256 | 16.6648596 | 160.4814588 | 2.7799E-09 | interferon induced transmembrane protein 1 [Source:HGNC Symbol;Acc:5412]                             |
| ENSG00000185201 | protein_coding | IFITM2  | -3.2081875 | 26.33153   | 243.3530318 | 1.2321E-10 | interferon induced transmembrane protein 2 [Source:HGNC Symbol;Acc:5413]                             |
| ENSG00000142089 | protein_coding | IFITM3  | -2.7644204 | 125.448817 | 852.3933222 | 3.55E-13   | interferon induced transmembrane protein 3 [Source:HGNC Symbol;Acc:5414]                             |
| ENSG00000115267 | protein_coding | IFIH1   | -2.2995242 | 69.4724491 | 342.0096663 | 5.6064E-07 | interferon induced with helicase C domain 1 [Source:HGNC Symbol;Acc:18873]                           |
| ENSG00000184995 | protein_coding | IFNE    | 4.6548158  | 66.2726302 | 2.630843587 | 0.00268876 | interferon, epsilon [Source:HGNC Symbol;Acc:18163]                                                   |
| ENSG00000115594 | protein_coding | IL1R1   | 2.209086   | 255.455634 | 55.24771533 | 0.01916106 | interleukin 1 receptor, type I [Source:HGNC Symbol;Acc:5993]                                         |
| ENSG00000095752 | protein_coding | IL11    | 4.7557337  | 177.686131 | 6.577108967 | 4.4663E-06 | interleukin 11 [Source:HGNC Symbol;Acc:5966]                                                         |
| ENSG00000174564 | protein_coding | IL20RB  | -3.034596  | 14.7689094 | 121.018805  | 1.2505E-06 | interleukin 20 receptor beta [Source:HGNC Symbol;Acc:6004]                                           |
| ENSG00000008517 | protein_coding | IL32    | Inf        | 39.2079933 | 0           | 0.00721176 | interleukin 32 [Source:HGNC Symbol;Acc:16830]                                                        |
| ENSG00000168685 | protein_coding | IL7R    | 3.1137285  | 364.368385 | 42.09349739 | 0.00022419 | interleukin 7 receptor [Source:HGNC Symbol;Acc:6024]                                                 |
| ENSG00000169429 | protein_coding | IL8     | 3.0552644  | 2449.2847  | 294.6544817 | 0.00123091 | interleukin 8 [Source:HGNC Symbol;Acc:6025]                                                          |
| ENSG00000090376 | protein_coding | IRAK3   | Inf        | 35.6896929 | 0           | 0.01373839 | interleukin-1 receptor-associated kinase 3 [Source:HGNC Symbol;Acc:17020]                            |
| ENSG00000148798 | protein_coding | INA     | Inf        | 50.1487034 | 0           | 0.00173822 | internexin neuronal intermediate filament protein, alpha [Source:HGNC Symbol;Acc:6057]               |
| ENSG00000114446 | protein_coding | IFT57   | 2.847283   | 85.1971612 | 11.83879614 | 0.02391225 | intraflagellar transport 57 homolog (Chlamydomonas) [Source:HGNC Symbol;Acc:17367]                   |
| ENSG00000011201 | protein_coding | KAL1    | Inf        | 73.5247816 | 0           | 6.6658E-05 | Kallmann syndrome 1 sequence [Source:HGNC Symbol;Acc:6211]                                           |
| ENSG00000102271 | protein_coding | KLHL4   | -3.2073843 | 9.82641833 | 90.76410375 | 6.0821E-07 | kelch-like 4 (Drosophila) [Source:HGNC Symbol;Acc:6355]                                              |
| ENSG00000131773 | protein_coding | KHDRBS3 | Inf        | 39.3616501 | 0           | 0.00675522 | KH domain containing, RNA binding, signal transduction associated 3 [Source:HGNC Symbol;Acc:18117]   |

|                 |                |               |            |            |             |            |                                                                                                               |
|-----------------|----------------|---------------|------------|------------|-------------|------------|---------------------------------------------------------------------------------------------------------------|
| ENSG00000164976 | protein_coding | KIAA1161      | 2.6405871  | 106.636112 | 17.10048332 | 0.02942024 | KIAA1161 [Source:HGNC Symbol;Acc:19918]                                                                       |
| ENSG00000103888 | protein_coding | KIAA1199      | -2.5779859 | 24.893868  | 148.6426627 | 5.7885E-06 | KIAA1199 [Source:HGNC Symbol;Acc:29213]                                                                       |
| ENSG00000112379 | protein_coding | KIAA1244      | 3.2823089  | 76.7873549 | 7.892530761 | 0.0175954  | KIAA1244 [Source:HGNC Symbol;Acc:21213]                                                                       |
| ENSG00000110318 | protein_coding | KIAA1377      | -2.0360328 | 102.637976 | 420.9349739 | 5.7642E-06 | KIAA1377 [Source:HGNC Symbol;Acc:29264]                                                                       |
| ENSG00000130518 | protein_coding | KIAA1683      | -2.0565682 | 6.3242104  | 26.30843587 | 0.04158071 | KIAA1683 [Source:HGNC Symbol;Acc:29350]                                                                       |
| ENSG00000116852 | protein_coding | KIF21B        | -3.7025347 | 9.39666977 | 122.3342268 | 2.5793E-10 | kinesin family member 21B [Source:HGNC Symbol;Acc:29442]                                                      |
| ENSG00000165115 | protein_coding | KIF27         | -2.4349594 | 6.81125647 | 36.83181022 | 0.01356113 | kinesin family member 27 [Source:HGNC Symbol;Acc:18632]                                                       |
| ENSG00000223519 | protein_coding | RP11-439E19.8 | -3.190058  | 1.44132489 | 13.15421793 | 0.01123109 | Kinesin-like protein KLP6 [Source:UniProtKB/Swiss-Prot;Acc:B7ZC32]                                            |
| ENSG00000112769 | protein_coding | LAMA4         | 7.3513064  | 1288.78361 | 7.892530761 | 9.8E-14    | laminin, alpha 4 [Source:HGNC Symbol;Acc:6484]                                                                |
| ENSG00000050555 | protein_coding | LAMC3         | -2.0620578 | 22.3656814 | 93.39494734 | 0.00384391 | laminin, gamma 3 [Source:HGNC Symbol;Acc:6494]                                                                |
| ENSG00000049323 | protein_coding | LTBP1         | 6.061917   | 263.636248 | 3.94626538  | 6.815E-09  | latent transforming growth factor beta binding protein 1 [Source:HGNC Symbol;Acc:6714]                        |
| ENSG00000119681 | protein_coding | LTBP2         | 5.0331517  | 172.287856 | 5.261687174 | 2.6358E-06 | latent transforming growth factor beta binding protein 2 [Source:HGNC Symbol;Acc:6715]                        |
| ENSG00000072071 | protein_coding | LPHN1         | -2.045354  | 17.5272915 | 72.34819864 | 0.00627875 | latrophilin 1 [Source:HGNC Symbol;Acc:20973]                                                                  |
| ENSG00000117114 | protein_coding | LPHN2         | 2.7127145  | 129.349493 | 19.7313269  | 0.0130794  | latrophilin 2 [Source:HGNC Symbol;Acc:18582]                                                                  |
| ENSG00000233851 | antisense      | LATS2-AS1     | -2.6400193 | 4.00953164 | 24.99301408 | 0.0275833  | LATS2 antisense RNA 1 (non-protein coding) [Source:HGNC Symbol;Acc:39912]                                     |
| ENSG00000110811 | protein_coding | LEPREL2       | Inf        | 80.8962711 | 0           | 2.5682E-05 | leprecan-like 2 [Source:HGNC Symbol;Acc:19318]                                                                |
| ENSG00000073350 | protein_coding | LLGL2         | -2.4629398 | 17.1782446 | 94.71036913 | 0.00036655 | lethal giant larvae homolog 2 (Drosophila) [Source:HGNC Symbol;Acc:6629]                                      |
| ENSG00000172061 | protein_coding | LRRRC15       | 5.2418205  | 49.7748807 | 1.315421793 | 0.00713557 | leucine rich repeat containing 15 [Source:HGNC Symbol;Acc:20818]                                              |
| ENSG00000214425 | pseudogene     | LRRRC37A4P    | -3.0554494 | 1.74050708 | 14.46963973 | 0.0157957  | leucine rich repeat containing 37, member A4, pseudogene [Source:HGNC Symbol;Acc:25479]                       |
| ENSG00000171488 | protein_coding | LRRRC8C       | 5.6397951  | 196.758627 | 3.94626538  | 2.4488E-07 | leucine rich repeat containing 8 family, member C [Source:HGNC Symbol;Acc:25075]                              |
| ENSG00000170382 | protein_coding | LRRN2         | -2.5507012 | 3.14308047 | 18.41590511 | 0.0313073  | leucine rich repeat neuronal 2 [Source:HGNC Symbol;Acc:16914]                                                 |
| ENSG00000244482 | protein_coding | LILRA6        | -2.9380263 | 1.54480445 | 11.83879614 | 0.02429036 | leukocyte immunoglobulin-like receptor, subfamily A (with TM domain), member 6 [Source:HGNC Symbol;Acc:15495] |
| ENSG00000213626 | protein_coding | LBH           | 4.8886724  | 77.934912  | 2.630843587 | 0.00079638 | limb bud and heart development homolog (mouse) [Source:HGNC Symbol;Acc:29532]                                 |
| ENSG00000103227 | protein_coding | LMF1          | -3.6877087 | 1.22499789 | 15.78506152 | 0.00369773 | lipase maturation factor 1 [Source:HGNC Symbol;Acc:14154]                                                     |
| ENSG00000101670 | protein_coding | LIPG          | Inf        | 38.1744466 | 0           | 0.00922173 | lipase, endothelial [Source:HGNC Symbol;Acc:6623]                                                             |

|                 |                |           |            |            |             |            |                                                                                                                       |
|-----------------|----------------|-----------|------------|------------|-------------|------------|-----------------------------------------------------------------------------------------------------------------------|
| ENSG00000234880 | lincRNA        | LINC00163 | -2.4355843 | 6.07884566 | 32.88554484 | 0.01547055 | long intergenic non-protein coding RNA 163 [Source:HGNC Symbol;Acc:33165]                                             |
| ENSG00000226496 | antisense      | LINC00323 | -3.581504  | 1.09881582 | 13.15421793 | 0.00566403 | long intergenic non-protein coding RNA 323 [Source:HGNC Symbol;Acc:19720]                                             |
| ENSG00000183674 | lincRNA        | LINC00518 | -4.0472575 | 0.79564464 | 13.15421793 | 0.00083307 | long intergenic non-protein coding RNA 518 [Source:HGNC Symbol;Acc:28626]                                             |
| ENSG00000124466 | protein_coding | LYPD3     | -3.3883511 | 2.88933266 | 30.25470125 | 0.00067861 | LY6/PLAUR domain containing 3 [Source:HGNC Symbol;Acc:24880]                                                          |
| ENSG00000171517 | protein_coding | LPAR3     | -2.4524522 | 4.56622121 | 24.99301408 | 0.00965731 | lysophosphatidic acid receptor 3 [Source:HGNC Symbol;Acc:14298]                                                       |
| ENSG00000204642 | protein_coding | HLA-F     | Inf        | 30.0000783 | 0           | 0.02704707 | major histocompatibility complex, class I, F [Source:HGNC Symbol;Acc:4963]                                            |
| ENSG00000147676 | lincRNA        | MAL2      | -3.3579193 | 73.9014702 | 757.682953  | 0          | mal, T-cell differentiation protein 2 (gene/pseudogene) [Source:HGNC Symbol;Acc:13634]                                |
| ENSG00000071073 | protein_coding | MGAT4A    | -3.5998212 | 3.68883971 | 44.72434098 | 4.6544E-06 | mannosyl (alpha-1,3-)-glycoprotein beta-1,4-N-acetylglucosaminyltransferase, isozyme A [Source:HGNC Symbol;Acc:14575] |
| ENSG00000214548 | lincRNA        | MEG3      | Inf        | 150.244905 | 0           | 2.6499E-08 | maternally expressed 3 (non-protein coding) [Source:HGNC Symbol;Acc:14575]                                            |
| ENSG00000087245 | protein_coding | MMP2      | Inf        | 150.667508 | 0           | 2.9478E-08 | matrix metalloproteinase 2 (gelatinase A, 72kDa gelatinase, 72kDa type IV collagenase) [Source:HGNC Symbol;Acc:7166]  |
| ENSG00000125966 | protein_coding | MMP24     | -2.796169  | 4.73450192 | 32.88554484 | 0.00416029 | matrix metalloproteinase 24 (membrane-inserted) [Source:HGNC Symbol;Acc:7172]                                         |
| ENSG00000129270 | protein_coding | MMP28     | -4.3631923 | 0.63916544 | 13.15421793 | 0.00050146 | matrix metalloproteinase 28 [Source:HGNC Symbol;Acc:14366]                                                            |
| ENSG00000167077 | protein_coding | MEI1      | Inf        | 47.7313612 | 0           | 0.00212653 | meiosis inhibitor 1 [Source:HGNC Symbol;Acc:28613]                                                                    |
| ENSG00000143995 | protein_coding | MEIS1     | 2.1917966  | 318.520534 | 69.71735505 | 0.01428001 | Meis homeobox 1 [Source:HGNC Symbol;Acc:7000]                                                                         |
| ENSG00000213401 | protein_coding | MAGEA12   | -3.3940096 | 2.37749671 | 24.99301408 | 0.00071501 | melanoma antigen family A, 12 [Source:HGNC Symbol;Acc:6799]                                                           |
| ENSG00000099399 | protein_coding | MAGEB2    | -3.6450897 | 13.6686949 | 171.0048332 | 7.01E-13   | melanoma antigen family B, 2 [Source:HGNC Symbol;Acc:6809]                                                            |
| ENSG00000179222 | protein_coding | MAGED1    | -3.2978145 | 7.2230016  | 71.03277685 | 5.6064E-07 | melanoma antigen family D, 1 [Source:HGNC Symbol;Acc:6813]                                                            |
| ENSG00000150054 | protein_coding | MPP7      | -2.0925164 | 49.3485964 | 210.467487  | 0.00011193 | membrane protein, palmitoylated 7 (MAGUK p55 subfamily member 7) [Source:HGNC Symbol;Acc:26542]                       |
| ENSG00000106484 | protein_coding | MEST      | 2.3205429  | 321.969058 | 64.45566788 | 0.00841493 | mesoderm specific transcript homolog (mouse) [Source:HGNC Symbol;Acc:7028]                                            |
| ENSG00000100060 | protein_coding | MFNG      | -4.1275301 | 0.90310013 | 15.78506152 | 0.00106679 | MFNG O-fucosylpeptide 3-beta-N-acetylglucosaminyltransferase [Source:HGNC Symbol;Acc:7038]                            |
| ENSG00000117122 | protein_coding | MFAP2     | 5.0257279  | 42.850892  | 1.315421793 | 0.01378713 | microfibrillar-associated protein 2 [Source:HGNC Symbol;Acc:7033]                                                     |
| ENSG00000209707 | miRNA          | MIR24-2   | -2.3081006 | 4.24988802 | 21.0467487  | 0.04000376 | microRNA 24-2 [Source:HGNC Symbol;Acc:31608]                                                                          |
| ENSG00000166963 | protein_coding | MAP1A     | 5.267463   | 50.6674899 | 1.315421793 | 0.00611583 | microtubule-associated protein 1A [Source:HGNC Symbol;Acc:6835]                                                       |
| ENSG00000131711 | protein_coding | MAP1B     | 5.4696408  | 1457.23972 | 32.88554484 | 7.1222E-10 | microtubule-associated protein 1B [Source:HGNC Symbol;Acc:6836]                                                       |
| ENSG00000249669 | lincRNA        | MIR143HG  | Inf        | 57.5843668 | 0           | 0.00090602 | MIR143 host gene (non-protein coding) [Source:HGNC Symbol;Acc:42872]                                                  |

|                 |                |            |            |            |             |            |                                                                                  |
|-----------------|----------------|------------|------------|------------|-------------|------------|----------------------------------------------------------------------------------|
| ENSG00000171889 | lincRNA        | MIR31HG    | 2.7358986  | 227.837883 | 34.20096663 | 0.00377537 | MIR31 host gene (non-protein coding) [Source:HGNC Symbol;Acc:37187]              |
| ENSG00000198899 | protein_coding | MT-ATP6    | -2.7284912 | 907.033937 | 6011.477596 | 1E-15      | mitochondrially encoded ATP synthase 6 [Source:HGNC Symbol;Acc:7414]             |
| ENSG00000198727 | protein_coding | MT-CYB     | -2.4021138 | 1218.92081 | 6442.935944 | 2.0628E-11 | mitochondrially encoded cytochrome b [Source:HGNC Symbol;Acc:7427]               |
| ENSG00000198712 | protein_coding | MT-CO2     | -2.2563408 | 2681.62311 | 12812.20827 | 3.2182E-07 | mitochondrially encoded cytochrome c oxidase II [Source:HGNC Symbol;Acc:7421]    |
| ENSG00000198888 | protein_coding | MT-ND1     | -2.0897091 | 1199.96149 | 5107.782824 | 3.1597E-09 | mitochondrially encoded NADH dehydrogenase 1 [Source:HGNC Symbol;Acc:7455]       |
| ENSG00000198763 | protein_coding | MT-ND2     | -2.1284821 | 1019.22834 | 4456.649036 | 2.4642E-09 | mitochondrially encoded NADH dehydrogenase 2 [Source:HGNC Symbol;Acc:7456]       |
| ENSG00000198886 | protein_coding | MT-ND4     | -2.5215909 | 2245.68862 | 12895.07984 | 3.3823E-10 | mitochondrially encoded NADH dehydrogenase 4 [Source:HGNC Symbol;Acc:7459]       |
| ENSG00000212907 | protein_coding | MT-ND4L    | -2.02524   | 427.530293 | 1740.303033 | 4.7624E-09 | mitochondrially encoded NADH dehydrogenase 4L [Source:HGNC Symbol;Acc:7460]      |
| ENSG00000198786 | protein_coding | MT-ND5     | -2.0491406 | 2157.19845 | 8927.767712 | 8.367E-07  | mitochondrially encoded NADH dehydrogenase 5 [Source:HGNC Symbol;Acc:7461]       |
| ENSG00000198695 | protein_coding | MT-ND6     | -2.6087341 | 262.019791 | 1598.237479 | 5E-15      | mitochondrially encoded NADH dehydrogenase 6 [Source:HGNC Symbol;Acc:7462]       |
| ENSG00000141639 | protein_coding | MAPK4      | -2.7379962 | 8.87275667 | 59.19398071 | 0.000145   | mitogen-activated protein kinase 4 [Source:HGNC Symbol;Acc:6878]                 |
| ENSG00000180815 | protein_coding | MAP3K15    | -2.6481767 | 3.35741014 | 21.0467487  | 0.01694232 | mitogen-activated protein kinase kinase kinase 15 [Source:HGNC Symbol;Acc:31689] |
| ENSG00000130675 | protein_coding | MNX1       | -4.0711056 | 1.17390074 | 19.7313269  | 0.00058115 | motor neuron and pancreas homeobox 1 [Source:HGNC Symbol;Acc:4979]               |
| ENSG00000226416 | antisense      | MRPL23-AS1 | -4.2712761 | 1.43054686 | 27.62385766 | 5.757E-06  | MRPL23 antisense RNA 1 (non-protein coding) [Source:HGNC Symbol;Acc:42812]       |
| ENSG00000181143 | protein_coding | MUC16      | 5.3616937  | 649.048151 | 15.78506152 | 7.7469E-10 | mucin 16, cell surface associated [Source:HGNC Symbol;Acc:15582]                 |
| ENSG00000117983 | protein_coding | MUC5B      | -2.6801957 | 2.87325225 | 18.41590511 | 0.00960386 | mucin 5B, oligomeric mucus/gel-forming [Source:HGNC Symbol;Acc:7516]             |
| ENSG00000184956 | protein_coding | MUC6       | -3.4850261 | 4.93420215 | 55.24771533 | 5.8421E-06 | mucin 6, oligomeric mucus/gel-forming [Source:HGNC Symbol;Acc:7517]              |
| ENSG00000106780 | protein_coding | MEGF9      | 2.3026315  | 577.585358 | 117.0725396 | 0.00679516 | multiple EGF-like-domains 9 [Source:HGNC Symbol;Acc:3234]                        |
| ENSG00000105695 | protein_coding | MAG        | -4.4183084 | 0.49216607 | 10.52337435 | 0.00105692 | myelin associated glycoprotein [Source:HGNC Symbol;Acc:6783]                     |
| ENSG00000149573 | protein_coding | MPZL2      | -2.8716131 | 25.1623603 | 184.1590511 | 4.6718E-08 | myelin protein zero-like 2 [Source:HGNC Symbol;Acc:3496]                         |
| ENSG00000186487 | protein_coding | MYT1L      | -2.828945  | 4.44302725 | 31.57012304 | 0.00290717 | myelin transcription factor 1-like [Source:HGNC Symbol;Acc:7623]                 |
| ENSG00000141052 | protein_coding | MYOCD      | Inf        | 288.477819 | 0           | 1.5465E-11 | myocardin [Source:HGNC Symbol;Acc:16067]                                         |
| ENSG00000081189 | protein_coding | MEF2C      | 3.6987734  | 85.4037201 | 6.577108967 | 0.00385886 | myocyte enhancer factor 2C [Source:HGNC Symbol;Acc:6996]                         |
| ENSG00000138347 | protein_coding | MYPN       | -2.5671051 | 129.850986 | 769.5217492 | 1.3488E-11 | myopalladin [Source:HGNC Symbol;Acc:23246]                                       |
| ENSG00000167306 | protein_coding | MYO5B      | -2.1403339 | 36.9983199 | 163.1123024 | 0.00036661 | myosin VB [Source:HGNC Symbol;Acc:7603]                                          |

|                 |                |           |            |            |             |              |                                                                                                                        |
|-----------------|----------------|-----------|------------|------------|-------------|--------------|------------------------------------------------------------------------------------------------------------------------|
| ENSG00000101335 | protein_coding | MYL9      | 2.580984   | 283.348634 | 47.35518456 | 0.00311116   | myosin, light chain 9, regulatory [Source:HGNC Symbol;Acc:15754]                                                       |
| ENSG00000104419 | protein_coding | NDRG1     | -2.0662484 | 266.98153  | 1118.108524 | 9.863E-08    | N-myc downstream regulated 1 [Source:HGNC Symbol;Acc:7679]                                                             |
| ENSG00000113389 | protein_coding | NPR3      | 4.8221202  | 707.003349 | 24.99301408 | 8.7981E-09   | natriuretic peptide receptor C/guanylate cyclase C (atrionatriuretic peptide receptor C) [Source:HGNC Symbol;Acc:7945] |
| ENSG00000176771 | protein_coding | NCKAP5    | 4.996337   | 41.9867564 | 1.315421793 | 0.02058217   | NCK-associated protein 5 [Source:HGNC Symbol;Acc:29847]                                                                |
| ENSG00000184613 | protein_coding | NELL2     | Inf        | 44.1856664 |             | 0 0.00330617 | NEL-like 2 (chicken) [Source:HGNC Symbol;Acc:7751]                                                                     |
| ENSG00000154654 | protein_coding | NCAM2     | Inf        | 46.5724366 |             | 0 0.00265484 | neural cell adhesion molecule 2 [Source:HGNC Symbol;Acc:7657]                                                          |
| ENSG00000182379 | protein_coding | NXPH4     | -2.6787675 | 2.46522699 | 15.78506152 | 0.04091653   | neurexophilin 4 [Source:HGNC Symbol;Acc:8078]                                                                          |
| ENSG00000067798 | protein_coding | NAV3      | 2.427973   | 226.520603 | 42.09349739 | 0.01258814   | neuron navigator 3 [Source:HGNC Symbol;Acc:15998]                                                                      |
| ENSG00000144460 | protein_coding | NYAP2     | -2.0263914 | 28.0918074 | 114.441696  | 0.00265484   | neuronal tyrosine-phosphorylated phosphoinositide-3-kinase adaptor 2 [Source:HGNC Symbol;Acc:29291]                    |
| ENSG00000056291 | protein_coding | NPFFR2    | -3.0741261 | 2.03050573 | 17.10048332 | 0.00435438   | neuropeptide FF receptor 2 [Source:HGNC Symbol;Acc:4525]                                                               |
| ENSG00000101188 | protein_coding | NTSR1     | -3.7563366 | 1.07074916 | 14.46963973 | 0.0017722    | neurotensin receptor 1 (high affinity) [Source:HGNC Symbol;Acc:8039]                                                   |
| ENSG00000116962 | protein_coding | NID1      | 6.8764416  | 154.553985 | 1.315421793 | 1.8097E-07   | nidogen 1 [Source:HGNC Symbol;Acc:7821]                                                                                |
| ENSG00000172548 | protein_coding | NIPAL4    | Inf        | 41.4084    |             | 0 0.00574195 | NIPA-like domain containing 4 [Source:HGNC Symbol;Acc:28018]                                                           |
| ENSG00000198929 | protein_coding | NOS1AP    | -3.0954992 | 6.15583411 | 52.61687174 | 0.00016639   | nitric oxide synthase 1 (neuronal) adaptor protein [Source:HGNC Symbol;Acc:16859]                                      |
| ENSG00000091592 | protein_coding | NLRP1     | Inf        | 93.9984114 |             | 0 5.9247E-06 | NLR family, pyrin domain containing 1 [Source:HGNC Symbol;Acc:14374]                                                   |
| ENSG00000188505 | protein_coding | NCCRP1    | -3.7832347 | 2.19748411 | 30.25470125 | 2.9123E-05   | non-specific cytotoxic cell receptor protein 1 homolog (zebrafish) [Source:HGNC Symbol;Acc:33739]                      |
| ENSG00000246181 | NOT FOUND      | NOT FOUND | -3.6879147 | 3.47033184 | 44.72434098 | 1.6737E-06   | NOT FOUND                                                                                                              |
| ENSG00000248119 | NOT FOUND      | NOT FOUND | -3.5023431 | 40.2795097 | 456.4513623 | 0            | NOT FOUND                                                                                                              |
| ENSG00000253769 | NOT FOUND      | NOT FOUND | -3.4056424 | 2.23427698 | 23.67759228 | 0.00176639   | NOT FOUND                                                                                                              |
| ENSG00000248959 | NOT FOUND      | NOT FOUND | -3.2563912 | 1.2388996  | 11.83879614 | 0.03590843   | NOT FOUND                                                                                                              |
| ENSG00000239660 | NOT FOUND      | NOT FOUND | -3.1776507 | 1.59915121 | 14.46963973 | 0.01713475   | NOT FOUND                                                                                                              |
| ENSG00000248940 | NOT FOUND      | NOT FOUND | -2.8740382 | 1.61486362 | 11.83879614 | 0.02833588   | NOT FOUND                                                                                                              |
| ENSG00000244846 | NOT FOUND      | NOT FOUND | -2.522651  | 18.084167  | 103.9183217 | 4.091E-05    | NOT FOUND                                                                                                              |
| ENSG00000074181 | protein_coding | NOTCH3    | 8.6317601  | 521.775578 | 1.315421793 | 1.66E-13     | notch 3 [Source:HGNC Symbol;Acc:7883]                                                                                  |
| ENSG00000185269 | protein_coding | NOTUM     | -2.4167099 | 4.68076112 | 24.99301408 | 0.03590843   | notum pectinacetylerase homolog (Drosophila) [Source:HGNC Symbol;Acc:27106]                                            |

|                 |                |         |            |            |             |            |                                                                                                         |
|-----------------|----------------|---------|------------|------------|-------------|------------|---------------------------------------------------------------------------------------------------------|
| ENSG00000100968 | protein_coding | NFATC4  | 5.5323342  | 121.756897 | 2.630843587 | 7.7962E-06 | nuclear factor of activated T-cells, cytoplasmic, calcineurin-dependent 4 [Source:HGNC Symbol;Acc:7778] |
| ENSG00000176046 | protein_coding | NUPR1   | -2.2302453 | 28.0345966 | 131.5421793 | 0.00123803 | nuclear protein, transcriptional regulator, 1 [Source:HGNC Symbol;Acc:29990]                            |
| ENSG00000130558 | protein_coding | OLFM1   | 3.3275028  | 356.538918 | 35.51638842 | 5.7508E-05 | olfactomedin 1 [Source:HGNC Symbol;Acc:17187]                                                           |
| ENSG00000185585 | protein_coding | OLFML2A | 2.1264163  | 315.895047 | 72.34819864 | 0.01855685 | olfactomedin-like 2A [Source:HGNC Symbol;Acc:27270]                                                     |
| ENSG00000021762 | protein_coding | OSBPL5  | -2.2999929 | 155.193784 | 764.260062  | 2.329E-08  | oxysterol binding protein-like 5 [Source:HGNC Symbol;Acc:16392]                                         |
| ENSG00000007372 | protein_coding | PAX6    | 3.9050986  | 98.5341699 | 6.577108967 | 0.00120372 | paired box 6 [Source:HGNC Symbol;Acc:8620]                                                              |
| ENSG00000204174 | protein_coding | PPYR1   | -3.6946139 | 14.4265931 | 186.7898947 | 3.07E-13   | pancreatic polypeptide receptor 1 [Source:HGNC Symbol;Acc:9329]                                         |
| ENSG00000243444 | protein_coding | PALM2   | 2.6003356  | 127.633312 | 21.0467487  | 0.01953723 | paralemmin 2 [Source:HGNC Symbol;Acc:15845]                                                             |
| ENSG00000139946 | protein_coding | PELI2   | 5.2686465  | 202.836294 | 5.261687174 | 4.2699E-07 | pellino E3 ubiquitin protein ligase family member 2 [Source:HGNC Symbol;Acc:8828]                       |
| ENSG00000147872 | protein_coding | PLIN2   | Inf        | 42.9671212 |             | 0.00377537 | perilipin 2 [Source:HGNC Symbol;Acc:248]                                                                |
| ENSG00000154217 | protein_coding | PITPNC1 | 2.6361729  | 155.376644 | 24.99301408 | 0.00910255 | phosphatidylinositol transfer protein, cytoplasmic 1 [Source:HGNC Symbol;Acc:21045]                     |
| ENSG00000107242 | protein_coding | PIP5K1B | -3.6406331 | 3.58594971 | 44.72434098 | 1.6553E-05 | phosphatidylinositol-4-phosphate 5-kinase, type I, beta [Source:HGNC Symbol;Acc:8995]                   |
| ENSG00000186642 | protein_coding | PDE2A   | 8.4157508  | 2246.09682 | 6.577108967 | 2.8E-14    | phosphodiesterase 2A, cGMP-stimulated [Source:HGNC Symbol;Acc:8777]                                     |
| ENSG00000160191 | protein_coding | PDE9A   | -3.9126838 | 2.96967391 | 44.72434098 | 6.3029E-07 | phosphodiesterase 9A [Source:HGNC Symbol;Acc:8795]                                                      |
| ENSG00000100889 | protein_coding | PCK2    | -2.248917  | 36.2530745 | 172.3202549 | 0.00013187 | phosphoenolpyruvate carboxykinase 2 (mitochondrial) [Source:HGNC Symbol;Acc:8725]                       |
| ENSG00000165434 | protein_coding | PGM2L1  | 2.6334625  | 228.546336 | 36.83181022 | 0.00350179 | phosphoglucomutase 2-like 1 [Source:HGNC Symbol;Acc:20898]                                              |
| ENSG00000153246 | protein_coding | PLA2R1  | 2.2103207  | 176.537053 | 38.14723201 | 0.0298762  | phospholipase A2 receptor 1, 180kDa [Source:HGNC Symbol;Acc:9042]                                       |
| ENSG00000176485 | protein_coding | PLA2G16 | -2.9564539 | 51.517799  | 399.8882252 | 3.49E-12   | phospholipase A2, group XVI [Source:HGNC Symbol;Acc:17825]                                              |
| ENSG00000138193 | protein_coding | PLCE1   | 4.6336448  | 65.3072047 | 2.630843587 | 0.00392312 | phospholipase C, epsilon 1 [Source:HGNC Symbol;Acc:17175]                                               |
| ENSG00000197943 | protein_coding | PLCG2   | -2.199828  | 5.15374958 | 23.67759228 | 0.044694   | phospholipase C, gamma 2 (phosphatidylinositol-specific) [Source:HGNC Symbol;Acc:9066]                  |
| ENSG00000154864 | protein_coding | PIEZO2  | 8.4362366  | 455.643618 | 1.315421793 | 6.47E-13   | piezo-type mechanosensitive ion channel component 2 [Source:HGNC Symbol;Acc:26270]                      |
| ENSG00000223573 | lincRNA        | PLAC2   | -3.620328  | 8.45015722 | 103.9183217 | 1.1353E-09 | placenta-specific 2 (non-protein coding) [Source:HGNC Symbol;Acc:14607]                                 |
| ENSG00000145287 | protein_coding | PLAC8   | -2.6582055 | 15.6288389 | 98.65663451 | 4.1769E-05 | placenta-specific 8 [Source:HGNC Symbol;Acc:19254]                                                      |
| ENSG00000057294 | protein_coding | PKP2    | -2.9097876 | 28.8812255 | 217.0445959 | 1.6683E-09 | plakophilin 2 [Source:HGNC Symbol;Acc:9024]                                                             |
| ENSG00000145431 | protein_coding | PDGFC   | 2.5191509  | 203.595786 | 35.51638842 | 0.00960386 | platelet derived growth factor C [Source:HGNC Symbol;Acc:8801]                                          |



|                 |                |                |            |            |             |            |                                                                                                                             |
|-----------------|----------------|----------------|------------|------------|-------------|------------|-----------------------------------------------------------------------------------------------------------------------------|
| ENSG00000156011 | protein_coding | PSD3           | 4.447629   | 401.848924 | 18.41590511 | 2.3821E-07 | pleckstrin and Sec7 domain containing 3 [Source:HGNC Symbol;Acc:19093]                                                      |
| ENSG00000105559 | protein_coding | PLEKHA4        | -2.2536665 | 3.86164069 | 18.41590511 | 0.04692274 | pleckstrin homology domain containing, family A (phosphoinositide binding specific) member 4 [Source:HGNC Symbol;Acc:14339] |
| ENSG00000143850 | protein_coding | PLEKHA6        | -2.5229189 | 44.6298457 | 256.5072497 | 2.7247E-07 | pleckstrin homology domain containing, family A member 6 [Source:HGNC Symbol;Acc:17053]                                     |
| ENSG00000166689 | protein_coding | PLEKHA7        | -2.2973841 | 42.8157436 | 210.467487  | 1.1896E-05 | pleckstrin homology domain containing, family A member 7 [Source:HGNC Symbol;Acc:27049]                                     |
| ENSG00000120594 | protein_coding | PLXDC2         | 3.853664   | 247.216153 | 17.10048332 | 2.2355E-05 | plexin domain containing 2 [Source:HGNC Symbol;Acc:21013]                                                                   |
| ENSG00000132429 | protein_coding | POPDC3         | 3.9895291  | 41.7890933 | 2.630843587 | 0.04540258 | popeye domain containing 3 [Source:HGNC Symbol;Acc:17649]                                                                   |
| ENSG00000148985 | protein_coding | PGAP2          | -2.9673485 | 95.3646008 | 745.8441569 | 4E-15      | post-GPI attachment to proteins 2 [Source:HGNC Symbol;Acc:17893]                                                            |
| ENSG00000178695 | protein_coding | KCTD12         | 2.5068042  | 1330.78624 | 234.1450792 | 0.0039377  | potassium channel tetramerisation domain containing 12 [Source:HGNC Symbol;Acc:14678]                                       |
| ENSG00000151364 | protein_coding | KCTD14         | -3.1074312 | 3.05256566 | 26.30843587 | 0.00218562 | potassium channel tetramerisation domain containing 14 [Source:HGNC Symbol;Acc:23295]                                       |
| ENSG00000143473 | protein_coding | KCNH1          | 3.2562137  | 75.4109264 | 7.892530761 | 0.02131745 | potassium voltage-gated channel, subfamily H (eag-related), member 1 [Source:HGNC Symbol;Acc:6250]                          |
| ENSG00000126838 | protein_coding | PZP            | -3.4547489 | 66.2248621 | 726.11283   | 0          | pregnancy-zone protein [Source:HGNC Symbol;Acc:9750]                                                                        |
| ENSG00000137819 | protein_coding | PAQR5          | -2.0051733 | 106.823137 | 428.8275047 | 7.9936E-06 | progesterin and adipoQ receptor family member V [Source:HGNC Symbol;Acc:29645]                                              |
| ENSG00000140479 | protein_coding | PCSK6          | -2.1883004 | 31.7478011 | 144.6963973 | 0.0001572  | proprotein convertase subtilisin/kexin type 6 [Source:HGNC Symbol;Acc:8569]                                                 |
| ENSG00000088899 | protein_coding | RP5-1187M17.10 | -2.0928916 | 8.01706171 | 34.20096663 | 0.0430699  | ProSAP-interacting protein 1 [Source:UniProtKB/Swiss-Prot;Acc:O60299]                                                       |
| ENSG00000171522 | protein_coding | PTGER4         | 2.0548001  | 273.269715 | 65.77108967 | 0.03862207 | prostaglandin E receptor 4 (subtype EP4) [Source:HGNC Symbol;Acc:9596]                                                      |
| ENSG00000225937 | antisense      | PCA3           | Inf        | 39.2069546 | 0           | 0.00713557 | prostate cancer antigen 3 (non-protein coding) [Source:HGNC Symbol;Acc:8637]                                                |
| ENSG00000124225 | protein_coding | PMEPA1         | 2.550431   | 570.233856 | 97.34121272 | 0.00166901 | prostate transmembrane protein, androgen induced 1 [Source:HGNC Symbol;Acc:14107]                                           |
| ENSG00000101000 | protein_coding | PROCR          | 3.2961468  | 77.5274242 | 7.892530761 | 0.01166427 | protein C receptor, endothelial [Source:HGNC Symbol;Acc:9452]                                                               |
| ENSG00000158528 | protein_coding | PPP1R9A        | -2.0639337 | 61.6616494 | 257.8226715 | 8.8724E-05 | protein phosphatase 1, regulatory subunit 9A [Source:HGNC Symbol;Acc:14946]                                                 |
| ENSG00000074211 | protein_coding | PPP2R2C        | Inf        | 37.8735819 | 0           | 0.01239371 | protein phosphatase 2, regulatory subunit B, gamma [Source:HGNC Symbol;Acc:9306]                                            |
| ENSG00000111679 | protein_coding | PTPN6          | -2.7949831 | 4.16978779 | 28.93927946 | 0.00278731 | protein tyrosine phosphatase, non-receptor type 6 [Source:HGNC Symbol;Acc:9658]                                             |
| ENSG00000138650 | protein_coding | PCDH10         | -4.1152759 | 2.8842118  | 49.98602815 | 5.3878E-08 | protocadherin 10 [Source:HGNC Symbol;Acc:13404]                                                                             |
| ENSG00000184226 | protein_coding | PCDH9          | -2.9912195 | 10.5876165 | 84.18699478 | 1.8682E-06 | protocadherin 9 [Source:HGNC Symbol;Acc:8661]                                                                               |
| ENSG00000106772 | protein_coding | PRUNE2         | Inf        | 1096.96124 | 0           | 0          | prune homolog 2 (Drosophila) [Source:HGNC Symbol;Acc:25209]                                                                 |
| ENSG00000204540 | protein_coding | PSORS1C1       | -2.0262349 | 10.33374   | 42.09349739 | 0.032459   | psoriasis susceptibility 1 candidate 1 [Source:HGNC Symbol;Acc:17202]                                                       |

|                 |                |          |            |            |             |            |                                                                                                           |
|-----------------|----------------|----------|------------|------------|-------------|------------|-----------------------------------------------------------------------------------------------------------|
| ENSG00000166387 | protein_coding | PPFIBP2  | -3.4840373 | 1.4107386  | 15.78506152 | 0.00392312 | PTPRF interacting protein, binding protein 2 (liprin beta 2) [Source:HGNC Symbol;Acc:9250]                |
| ENSG00000250305 | protein_coding | KIAA1456 | -4.1353825 | 1.94609579 | 34.20096663 | 2.3304E-06 | Putative methyltransferase KIAA1456 [Source:UniProtKB/Swiss-Prot;Acc:Q9P272]                              |
| ENSG00000171631 | protein_coding | P2RY6    | -3.0515782 | 2.06248984 | 17.10048332 | 0.01545641 | pyrimidinergic receptor P2Y, G-protein coupled, 6 [Source:HGNC Symbol;Acc:8543]                           |
| ENSG00000004799 | protein_coding | PDK4     | 3.3342741  | 504.156243 | 49.98602815 | 3.2304E-05 | pyruvate dehydrogenase kinase, isozyme 4 [Source:HGNC Symbol;Acc:8812]                                    |
| ENSG00000124839 | protein_coding | RAB17    | -3.2743133 | 11.4203073 | 110.4954307 | 3.672E-08  | RAB17, member RAS oncogene family [Source:HGNC Symbol;Acc:16523]                                          |
| ENSG00000118508 | protein_coding | RAB32    | 2.3044027  | 233.917052 | 47.35518456 | 0.00966898 | RAB32, member RAS oncogene family [Source:HGNC Symbol;Acc:9772]                                           |
| ENSG00000169213 | protein_coding | RAB3B    | 5.1673449  | 47.2705703 | 1.315421793 | 0.00922173 | RAB3B, member RAS oncogene family [Source:HGNC Symbol;Acc:9778]                                           |
| ENSG00000134321 | protein_coding | RSAD2    | -3.174345  | 2.76850661 | 24.99301408 | 0.00105993 | radical S-adenosyl methionine domain containing 2 [Source:HGNC Symbol;Acc:30908]                          |
| ENSG00000165105 | protein_coding | RASEF    | Inf        | 40.9839371 | 0           | 0.00625926 | RAS and EF-hand domain containing [Source:HGNC Symbol;Acc:26464]                                          |
| ENSG00000136653 | protein_coding | RASSF5   | -2.9778965 | 26.7146098 | 210.467487  | 1.1143E-09 | Ras association (RalGDS/AF-6) domain family member 5 [Source:HGNC Symbol;Acc:17609]                       |
| ENSG00000177105 | protein_coding | RHOG     | -2.5961127 | 79.6229594 | 481.4443764 | 8.5314E-10 | ras homolog family member G [Source:HGNC Symbol;Acc:672]                                                  |
| ENSG00000116574 | protein_coding | RHOU     | -2.5316838 | 4.77717939 | 27.62385766 | 0.01937693 | ras homolog family member U [Source:HGNC Symbol;Acc:17794]                                                |
| ENSG00000104140 | protein_coding | RHOV     | -3.0910282 | 8.33617055 | 71.03277685 | 4.829E-06  | ras homolog family member V [Source:HGNC Symbol;Acc:18313]                                                |
| ENSG00000143333 | protein_coding | RGS16    | -2.2857173 | 6.74427967 | 32.88554484 | 0.02077583 | regulator of G-protein signaling 16 [Source:HGNC Symbol;Acc:9997]                                         |
| ENSG00000186907 | protein_coding | RTN4RL2  | -4.0818451 | 1.16519463 | 19.7313269  | 0.00035281 | reticulon 4 receptor-like 2 [Source:HGNC Symbol;Acc:23053]                                                |
| ENSG00000039560 | protein_coding | RAI14    | 2.5396347  | 994.293525 | 171.0048332 | 0.00208974 | retinoic acid induced 14 [Source:HGNC Symbol;Acc:14873]                                                   |
| ENSG00000133321 | protein_coding | RARRES3  | -3.0098079 | 2.61301889 | 21.0467487  | 0.00484685 | retinoic acid receptor responder (tazarotene induced) 3 [Source:HGNC Symbol;Acc:9869]                     |
| ENSG00000031081 | protein_coding | ARHGAP31 | 5.2786208  | 51.0608727 | 1.315421793 | 0.00689948 | Rho GTPase activating protein 31 [Source:HGNC Symbol;Acc:29216]                                           |
| ENSG00000089820 | protein_coding | ARHGAP4  | -2.7837992 | 2.1011191  | 14.46963973 | 0.04742567 | Rho GTPase activating protein 4 [Source:HGNC Symbol;Acc:674]                                              |
| ENSG00000129667 | protein_coding | RHBDF2   | -2.4877268 | 15.4784893 | 86.81783837 | 0.00061099 | rhomboid 5 homolog 2 (Drosophila) [Source:HGNC Symbol;Acc:20788]                                          |
| ENSG00000071242 | protein_coding | RPS6KA2  | 7.9199413  | 318.570036 | 1.315421793 | 3.4585E-11 | ribosomal protein S6 kinase, 90kDa, polypeptide 2 [Source:HGNC Symbol;Acc:10431]                          |
| ENSG00000101695 | protein_coding | RNF125   | -2.7961486 | 4.16642064 | 28.93927946 | 0.00574489 | ring finger protein 125, E3 ubiquitin protein ligase [Source:HGNC Symbol;Acc:21150]                       |
| ENSG00000137393 | protein_coding | RNF144B  | -2.4990859 | 9.77269858 | 55.24771533 | 0.00278731 | ring finger protein 144B [Source:HGNC Symbol;Acc:21578]                                                   |
| ENSG00000178222 | protein_coding | RNF212   | Inf        | 102.866047 | 0           | 1.9693E-06 | ring finger protein 212 [Source:HGNC Symbol;Acc:27729]                                                    |
| ENSG00000248124 | pseudogene     | RRN3P1   | Inf        | 48.2154502 | 0           | 0.00201564 | RNA polymerase I transcription factor homolog (S. cerevisiae) pseudogene 1 [Source:HGNC Symbol;Acc:30548] |

|                 |                |          |            |            |             |            |                                                                                                                             |
|-----------------|----------------|----------|------------|------------|-------------|------------|-----------------------------------------------------------------------------------------------------------------------------|
| ENSG00000238304 | snRNA          | RNU7-50P | -3.2555353 | 1.37737199 | 13.15421793 | 0.02159979 | RNA, U7 small nuclear 50 pseudogene [Source:HGNC Symbol;Acc:34146]                                                          |
| ENSG00000020633 | protein_coding | RUNX3    | 6.4909174  | 118.311206 | 1.315421793 | 2.7261E-06 | runt-related transcription factor 3 [Source:HGNC Symbol;Acc:10473]                                                          |
| ENSG00000196754 | protein_coding | S100A2   | 2.7233949  | 95.5611266 | 14.46963973 | 0.01855685 | S100 calcium binding protein A2 [Source:HGNC Symbol;Acc:10492]                                                              |
| ENSG00000163993 | protein_coding | S100P    | -3.7062509 | 4.43429944 | 57.87855891 | 1.5354E-06 | S100 calcium binding protein P [Source:HGNC Symbol;Acc:10504]                                                               |
| ENSG00000168079 | protein_coding | SCARA5   | -3.2728726 | 3.5383888  | 34.20096663 | 0.00058115 | scavenger receptor class A, member 5 (putative) [Source:HGNC Symbol;Acc:28701]                                              |
| ENSG00000172716 | protein_coding | SLFN11   | -3.5527752 | 20.7369483 | 243.3530318 | 1.6E-14    | schlafen family member 11 [Source:HGNC Symbol;Acc:26633]                                                                    |
| ENSG00000006747 | protein_coding | SCIN     | -3.574517  | 14.353954  | 171.0048332 | 6.588E-12  | scinderin [Source:HGNC Symbol;Acc:21695]                                                                                    |
| ENSG00000133488 | protein_coding | SEC14L4  | -3.6623265 | 1.35063578 | 17.10048332 | 0.00418964 | SEC14-like 4 (S. cerevisiae) [Source:HGNC Symbol;Acc:20627]                                                                 |
| ENSG00000075213 | protein_coding | SEMA3A   | 3.6827632  | 168.922391 | 13.15421793 | 0.00017283 | sema domain, immunoglobulin domain (Ig), short basic domain, secreted, (semaphorin) 3A [Source:HGNC Symbol;Acc:10723]       |
| ENSG00000122862 | protein_coding | SRGN     | Inf        | 150.128484 | 0           | 2.3016E-08 | serglycin [Source:HGNC Symbol;Acc:9361]                                                                                     |
| ENSG00000178172 | protein_coding | SPINK6   | 4.3616132  | 1703.65627 | 82.87157299 | 2.0805E-07 | serine peptidase inhibitor, Kazal type 6 [Source:HGNC Symbol;Acc:29486]                                                     |
| ENSG00000152953 | protein_coding | STK32B   | Inf        | 33.4562418 | 0           | 0.01891156 | serine/threonine kinase 32B [Source:HGNC Symbol;Acc:14217]                                                                  |
| ENSG00000130413 | protein_coding | STK33    | Inf        | 48.3670242 | 0           | 0.00201564 | serine/threonine kinase 33 [Source:HGNC Symbol;Acc:14568]                                                                   |
| ENSG00000170542 | protein_coding | SERPINB9 | -2.1285807 | 14.7398978 | 64.45566788 | 0.00706935 | serpin peptidase inhibitor, clade B (ovalbumin), member 9 [Source:HGNC Symbol;Acc:8955]                                     |
| ENSG00000106366 | protein_coding | SERPINE1 | 2.4998233  | 520.816652 | 92.07952554 | 0.00280785 | serpin peptidase inhibitor, clade E (nexin, plasminogen activator inhibitor type 1), member 1 [Source:HGNC Symbol;Acc:8583] |
| ENSG00000082497 | protein_coding | SERTAD4  | -2.7751659 | 4.80393217 | 32.88554484 | 0.0020365  | SERTA domain containing 4 [Source:HGNC Symbol;Acc:25236]                                                                    |
| ENSG00000149212 | protein_coding | SESN3    | Inf        | 415.024915 | 0           | 1.91E-13   | sestrin 3 [Source:HGNC Symbol;Acc:23060]                                                                                    |
| ENSG00000144681 | protein_coding | STAC     | 3.1761503  | 154.569891 | 17.10048332 | 0.00161399 | SH3 and cysteine rich domain [Source:HGNC Symbol;Acc:11353]                                                                 |
| ENSG00000154447 | protein_coding | SH3RF1   | 2.2539789  | 232.157121 | 48.67060636 | 0.01935274 | SH3 domain containing ring finger 1 [Source:HGNC Symbol;Acc:17650]                                                          |
| ENSG00000172985 | protein_coding | SH3RF3   | -3.2443283 | 12.6318302 | 119.7033832 | 4.2814E-08 | SH3 domain containing ring finger 3 [Source:HGNC Symbol;Acc:24699]                                                          |
| ENSG00000170786 | protein_coding | SDR16C5  | -2.1062351 | 13.7479393 | 59.19398071 | 0.00866945 | short chain dehydrogenase/reductase family 16C, member 5 [Source:HGNC Symbol;Acc:30311]                                     |
| ENSG00000198053 | protein_coding | SIRPA    | Inf        | 31.9591212 | 0           | 0.02142213 | signal-regulatory protein alpha [Source:HGNC Symbol;Acc:9662]                                                               |
| ENSG00000179542 | protein_coding | SLITRK4  | Inf        | 108.350065 | 0           | 1.0303E-06 | SLIT and NTRK-like family, member 4 [Source:HGNC Symbol;Acc:23502]                                                          |
| ENSG00000196876 | protein_coding | SCN8A    | -3.7828793 | 13.1881528 | 181.5282075 | 4E-14      | sodium channel, voltage gated, type VIII, alpha subunit [Source:HGNC Symbol;Acc:10596]                                      |
| ENSG00000144285 | protein_coding | SCN1A    | -2.2965503 | 25.4365437 | 124.9650704 | 0.00022584 | sodium channel, voltage-gated, type I, alpha subunit [Source:HGNC Symbol;Acc:10585]                                         |

|                 |                |          |            |            |             |            |                                                                                                                                        |
|-----------------|----------------|----------|------------|------------|-------------|------------|----------------------------------------------------------------------------------------------------------------------------------------|
| ENSG00000106688 | protein_coding | SLC1A1   | 3.8649641  | 76.6646476 | 5.261687174 | 0.0047816  | solute carrier family 1 (neuronal/epithelial high affinity glutamate transporter, system Xag), member 1 [Source:HGNC Symbol;Acc:10939] |
| ENSG00000113504 | protein_coding | SLC12A7  | 4.7307183  | 69.8526923 | 2.630843587 | 0.00207361 | solute carrier family 12 (potassium/chloride transporters), member 7 [Source:HGNC Symbol;Acc:10915]                                    |
| ENSG00000070915 | protein_coding | SLC12A3  | -3.5318321 | 35.4839706 | 410.4115996 | 0          | solute carrier family 12 (sodium/chloride transporters), member 3 [Source:HGNC Symbol;Acc:10912]                                       |
| ENSG00000174327 | protein_coding | SLC16A13 | -2.6052469 | 2.59411251 | 15.78506152 | 0.04213619 | solute carrier family 16, member 13 (monocarboxylic acid transporter 13) [Source:HGNC Symbol;Acc:31037]                                |
| ENSG00000146411 | protein_coding | SLC2A12  | 3.3192916  | 78.7812025 | 7.892530761 | 0.01306583 | solute carrier family 2 (facilitated glucose transporter), member 12 [Source:HGNC Symbol;Acc:18067]                                    |
| ENSG00000059804 | protein_coding | SLC2A3   | -2.7254077 | 249.023248 | 1646.908085 | 3E-15      | solute carrier family 2 (facilitated glucose transporter), member 3 [Source:HGNC Symbol;Acc:11007]                                     |
| ENSG00000160326 | protein_coding | SLC2A6   | 4.7823233  | 72.3965375 | 2.630843587 | 0.00164107 | solute carrier family 2 (facilitated glucose transporter), member 6 [Source:HGNC Symbol;Acc:11011]                                     |
| ENSG00000170482 | protein_coding | SLC23A1  | -2.3265722 | 4.720299   | 23.67759228 | 0.04746296 | solute carrier family 23 (nucleobase transporters), member 1 [Source:HGNC Symbol;Acc:10974]                                            |
| ENSG00000197506 | protein_coding | SLC28A3  | -3.5935139 | 0.87176526 | 10.52337435 | 0.00788913 | solute carrier family 28 (sodium-coupled nucleoside transporter), member 3 [Source:HGNC Symbol;Acc:16484]                              |
| ENSG00000168917 | protein_coding | SLC35G2  | 2.6052263  | 136.070883 | 22.36217049 | 0.01378713 | solute carrier family 35, member G2 [Source:HGNC Symbol;Acc:28480]                                                                     |
| ENSG00000188338 | lincRNA        | SLC38A3  | -2.7927717 | 2.27791876 | 15.78506152 | 0.02623094 | solute carrier family 38, member 3 [Source:HGNC Symbol;Acc:18044]                                                                      |
| ENSG00000165915 | protein_coding | SLC39A13 | 2.4097616  | 167.759373 | 31.57012304 | 0.01741662 | solute carrier family 39 (zinc transporter), member 13 [Source:HGNC Symbol;Acc:20859]                                                  |
| ENSG00000149150 | protein_coding | SLC43A1  | -2.554163  | 3.13554751 | 18.41590511 | 0.03590843 | solute carrier family 43, member 1 [Source:HGNC Symbol;Acc:9225]                                                                       |
| ENSG00000063127 | protein_coding | SLC6A16  | -3.4332644 | 2.31367873 | 24.99301408 | 0.00096166 | solute carrier family 6, member 16 [Source:HGNC Symbol;Acc:13622]                                                                      |
| ENSG00000137642 | protein_coding | SORL1    | 4.7638161  | 357.368757 | 13.15421793 | 7.557E-08  | sortilin-related receptor, L(DLR class) A repeats containing [Source:HGNC Symbol;Acc:11185]                                            |
| ENSG00000184985 | protein_coding | SORCS2   | -2.2237443 | 7.04030234 | 32.88554484 | 0.02429036 | sortilin-related VPS10 domain containing receptor 2 [Source:HGNC Symbol;Acc:16698]                                                     |
| ENSG00000086300 | protein_coding | SNX10    | -3.9154206 | 2.70251239 | 40.7780756  | 2.6358E-06 | sorting nexin 10 [Source:HGNC Symbol;Acc:14974]                                                                                        |
| ENSG00000178996 | protein_coding | SNX18    | 2.0552844  | 213.221943 | 51.30144995 | 0.04797686 | sorting nexin 18 [Source:HGNC Symbol;Acc:19245]                                                                                        |
| ENSG00000152377 | protein_coding | SPOCK1   | 2.8926451  | 1142.94103 | 153.9043498 | 0.00048526 | sparc/osteonectin, cwcv and kazal-like domains proteoglycan (testican) 1 [Source:HGNC Symbol;Acc:11251]                                |
| ENSG00000088826 | protein_coding | SMOX     | -2.0981775 | 22.1198997 | 94.71036913 | 0.00270012 | spermine oxidase [Source:HGNC Symbol;Acc:15862]                                                                                        |
| ENSG00000176170 | protein_coding | SPHK1    | 3.6499558  | 511.885593 | 40.7780756  | 4.6751E-06 | sphingosine kinase 1 [Source:HGNC Symbol;Acc:11240]                                                                                    |
| ENSG00000134668 | protein_coding | SPOCD1   | 6.4074816  | 223.325941 | 2.630843587 | 1.1502E-08 | SPOC domain containing 1 [Source:HGNC Symbol;Acc:26338]                                                                                |
| ENSG00000164056 | protein_coding | SPRY1    | -3.3865771 | 2.26399916 | 23.67759228 | 0.00099663 | sprouty homolog 1, antagonist of FGF signaling (Drosophila) [Source:HGNC Symbol;Acc:11269]                                             |
| ENSG00000017373 | protein_coding | SRCIN1   | -3.1765544 | 1.30939112 | 11.83879614 | 0.03279342 | SRC kinase signaling inhibitor 1 [Source:HGNC Symbol;Acc:29506]                                                                        |
| ENSG00000127954 | protein_coding | STEAP4   | -2.7187568 | 127.884423 | 841.8699478 | 7.4E-14    | STEAP family member 4 [Source:HGNC Symbol;Acc:21923]                                                                                   |

|                 |                |         |            |            |             |            |                                                                                                              |
|-----------------|----------------|---------|------------|------------|-------------|------------|--------------------------------------------------------------------------------------------------------------|
| ENSG00000187634 | protein_coding | SAMD11  | 2.9201097  | 149.347142 | 19.7313269  | 0.00339229 | sterile alpha motif domain containing 11 [Source:HGNC Symbol;Acc:28706]                                      |
| ENSG00000165730 | protein_coding | STOX1   | -3.496642  | 0.93231117 | 10.52337435 | 0.0313127  | storkhead box 1 [Source:HGNC Symbol;Acc:23508]                                                               |
| ENSG00000090402 | protein_coding | SI      | Inf        | 28.3731574 | 0           | 0.0423781  | sucrase-isomaltase (alpha-glucosidase) [Source:HGNC Symbol;Acc:10856]                                        |
| ENSG00000099994 | protein_coding | SUSD2   | -3.1050669 | 6.42090209 | 55.24771533 | 0.00019023 | sushi domain containing 2 [Source:HGNC Symbol;Acc:30667]                                                     |
| ENSG00000165124 | protein_coding | SVEP1   | -3.3789978 | 101.910841 | 1060.229966 | 0          | sushi, von Willebrand factor type A, EGF and pentraxin domain containing 1 [Source:HGNC Symbol;Acc:15985]    |
| ENSG00000143858 | protein_coding | SYT2    | -2.7970483 | 5.29941134 | 36.83181022 | 0.00219214 | synaptotagmin II [Source:HGNC Symbol;Acc:11510]                                                              |
| ENSG00000147041 | protein_coding | SYTL5   | Inf        | 36.3994809 | 0           | 0.01064568 | synaptotagmin-like 5 [Source:HGNC Symbol;Acc:15589]                                                          |
| ENSG00000164506 | protein_coding | STXBP5  | 2.0337103  | 1308.81756 | 319.6474958 | 0.02909901 | syntaxin binding protein 5 (tomosyn) [Source:HGNC Symbol;Acc:19665]                                          |
| ENSG00000145335 | protein_coding | SNCA    | 5.0182133  | 42.6282748 | 1.315421793 | 0.01486073 | synuclein, alpha (non A4 component of amyloid precursor) [Source:HGNC Symbol;Acc:11138]                      |
| ENSG00000135111 | protein_coding | TBX3    | -2.596706  | 151.134439 | 914.2181465 | 2.308E-12  | T-box 3 [Source:HGNC Symbol;Acc:11602]                                                                       |
| ENSG00000164458 | protein_coding | T       | Inf        | 45.5629376 | 0           | 0.00268197 | T, brachyury homolog (mouse) [Source:HGNC Symbol;Acc:11515]                                                  |
| ENSG00000135090 | protein_coding | TAOK3   | -2.2223817 | 57.5031504 | 268.3460459 | 1.3864E-05 | TAO kinase 3 [Source:HGNC Symbol;Acc:18133]                                                                  |
| ENSG00000041982 | protein_coding | TNC     | 2.5249343  | 295.264073 | 51.30144995 | 0.0043879  | tenascin C [Source:HGNC Symbol;Acc:5318]                                                                     |
| ENSG00000168477 | protein_coding | TNXB    | -2.2545088 | 6.89176175 | 32.88554484 | 0.02931263 | tenascin XB [Source:HGNC Symbol;Acc:11976]                                                                   |
| ENSG00000079308 | protein_coding | TNS1    | -2.5717533 | 136.955919 | 814.2460902 | 7.024E-12  | tensin 1 [Source:HGNC Symbol;Acc:11973]                                                                      |
| ENSG00000157570 | protein_coding | TSPAN18 | Inf        | 29.4629305 | 0           | 0.03222865 | tetraspanin 18 [Source:HGNC Symbol;Acc:20660]                                                                |
| ENSG00000117289 | protein_coding | TXNIP   | -2.473538  | 86.9204501 | 482.7597982 | 9.1746E-09 | thioredoxin interacting protein [Source:HGNC Symbol;Acc:16952]                                               |
| ENSG00000154096 | protein_coding | THY1    | Inf        | 69.2543337 | 0           | 0.00010935 | Thy-1 cell surface antigen [Source:HGNC Symbol;Acc:11801]                                                    |
| ENSG00000198846 | protein_coding | TOX     | 5.7416863  | 70.3857666 | 1.315421793 | 0.00062423 | thymocyte selection-associated high mobility group box [Source:HGNC Symbol;Acc:18988]                        |
| ENSG00000105825 | protein_coding | TFPI2   | 4.7691853  | 107.610372 | 3.94626538  | 0.00010396 | tissue factor pathway inhibitor 2 [Source:HGNC Symbol;Acc:11761]                                             |
| ENSG00000050730 | protein_coding | TNIP3   | Inf        | 33.3576533 | 0           | 0.02073178 | TNFAIP3 interacting protein 3 [Source:HGNC Symbol;Acc:19315]                                                 |
| ENSG00000136869 | protein_coding | TLR4    | 2.9064205  | 226.83634  | 30.25470125 | 0.00175888 | toll-like receptor 4 [Source:HGNC Symbol;Acc:11850]                                                          |
| ENSG00000196628 | protein_coding | TCF4    | -4.7253294 | 0.59673348 | 15.78506152 | 5.0691E-05 | transcription factor 4 [Source:HGNC Symbol;Acc:11634]                                                        |
| ENSG00000137203 | protein_coding | TFAP2A  | -2.255838  | 136.606641 | 652.4492096 | 2.8131E-08 | transcription factor AP-2 alpha (activating enhancer binding protein 2 alpha) [Source:HGNC Symbol;Acc:11742] |
| ENSG00000065717 | protein_coding | TLE2    | -3.1254888 | 1.50729815 | 13.15421793 | 0.01751071 | transducin-like enhancer of split 2 (E(sp1) homolog, Drosophila) [Source:HGNC Symbol;Acc:11838]              |

|                 |                |           |            |            |             |            |                                                                                                       |
|-----------------|----------------|-----------|------------|------------|-------------|------------|-------------------------------------------------------------------------------------------------------|
| ENSG00000140682 | protein_coding | TGFB11    | 3.4263557  | 98.9917331 | 9.207952554 | 0.00478396 | transforming growth factor beta 1 induced transcript 1 [Source:HGNC Symbol;Acc:11767]                 |
| ENSG00000092969 | protein_coding | TGFB2     | 3.084763   | 245.523973 | 28.93927946 | 0.00066228 | transforming growth factor, beta 2 [Source:HGNC Symbol;Acc:11768]                                     |
| ENSG00000120708 | protein_coding | TGFBI     | 3.5474135  | 7382.17172 | 631.4024609 | 0.01439638 | transforming growth factor, beta-induced, 68kDa [Source:HGNC Symbol;Acc:11771]                        |
| ENSG00000103534 | protein_coding | TMC5      | -3.3000181 | 22.9714835 | 226.2525485 | 1.48E-11   | transmembrane channel-like 5 [Source:HGNC Symbol;Acc:22999]                                           |
| ENSG00000141524 | protein_coding | TMC6      | -2.2164625 | 9.62326093 | 44.72434098 | 0.01428001 | transmembrane channel-like 6 [Source:HGNC Symbol;Acc:18021]                                           |
| ENSG00000215367 | pseudogene     | TMED11P   | Inf        | 41.0906863 | 0           | 0.00563174 | transmembrane emp24 protein transport domain containing 11, pseudogene [Source:HGNC Symbol;Acc:35401] |
| ENSG00000166157 | protein_coding | TPTE      | -3.4523109 | 2.8842118  | 31.57012304 | 5.9111E-05 | transmembrane phosphatase with tensin homology [Source:HGNC Symbol;Acc:12023]                         |
| ENSG00000160183 | protein_coding | TMPRSS3   | -2.0634328 | 46.5770068 | 194.6824254 | 0.00015271 | transmembrane protease, serine 3 [Source:HGNC Symbol;Acc:11877]                                       |
| ENSG00000170006 | protein_coding | TMEM154   | Inf        | 33.8091297 | 0           | 0.01551972 | transmembrane protein 154 [Source:HGNC Symbol;Acc:26489]                                              |
| ENSG00000249992 | protein_coding | TMEM158   | 4.5540441  | 61.8014838 | 2.630843587 | 0.00416029 | transmembrane protein 158 (gene/pseudogene) [Source:HGNC Symbol;Acc:30293]                            |
| ENSG00000101255 | protein_coding | TRIB3     | -3.0646401 | 74.5237647 | 623.5099301 | 1.2E-14    | tribbles homolog 3 (Drosophila) [Source:HGNC Symbol;Acc:16228]                                        |
| ENSG00000108448 | protein_coding | TRIM16L   | 2.3779227  | 464.943318 | 89.44868196 | 0.00330617 | tripartite motif containing 16-like [Source:HGNC Symbol;Acc:32670]                                    |
| ENSG00000137699 | protein_coding | TRIM29    | -3.1326956 | 72.28975   | 634.0333045 | 0          | tripartite motif containing 29 [Source:HGNC Symbol;Acc:17274]                                         |
| ENSG00000167333 | protein_coding | TRIM68    | -2.1345886 | 17.3747206 | 76.29446402 | 0.00611583 | tripartite motif containing 68 [Source:HGNC Symbol;Acc:21161]                                         |
| ENSG00000179046 | protein_coding | TRIML2    | -4.6283846 | 0.42547342 | 10.52337435 | 0.00163453 | tripartite motif family-like 2 [Source:HGNC Symbol;Acc:26378]                                         |
| ENSG00000140416 | protein_coding | TPM1      | 2.1149393  | 2096.87724 | 484.07522   | 0.03346424 | tropomyosin 1 (alpha) [Source:HGNC Symbol;Acc:12010]                                                  |
| ENSG00000166402 | protein_coding | TUB       | 3.4501638  | 258.785732 | 23.67759228 | 0.00010422 | tubby homolog (mouse) [Source:HGNC Symbol;Acc:12406]                                                  |
| ENSG00000156414 | protein_coding | TDRD9     | Inf        | 155.906056 | 0           | 1.8291E-08 | tudor domain containing 9 [Source:HGNC Symbol;Acc:20122]                                              |
| ENSG00000181634 | protein_coding | TNFSF15   | -3.3935641 | 6.38367285 | 67.08651147 | 2.732E-06  | tumor necrosis factor (ligand) superfamily, member 15 [Source:HGNC Symbol;Acc:11931]                  |
| ENSG00000164761 | protein_coding | TNFRSF11B | Inf        | 97.8067041 | 0           | 2.7251E-06 | tumor necrosis factor receptor superfamily, member 11b [Source:HGNC Symbol;Acc:11909]                 |
| ENSG00000127863 | protein_coding | TNFRSF19  | Inf        | 65.7414703 | 0           | 0.00015335 | tumor necrosis factor receptor superfamily, member 19 [Source:HGNC Symbol;Acc:11915]                  |
| ENSG00000104723 | protein_coding | TUSC3     | 6.3577751  | 323.64381  | 3.94626538  | 4.9018E-10 | tumor suppressor candidate 3 [Source:HGNC Symbol;Acc:30242]                                           |
| ENSG00000169902 | protein_coding | TPST1     | 3.0386062  | 226.984359 | 27.62385766 | 0.00069354 | tyrosylprotein sulfotransferase 1 [Source:HGNC Symbol;Acc:12020]                                      |
| ENSG00000202077 | snRNA          | U1        | -2.6901805 | 2.44580179 | 15.78506152 | 0.02494498 | U1 spliceosomal RNA [Source:RFAM;Acc:RF00003]                                                         |
| ENSG00000036672 | protein_coding | USP2      | -2.3322176 | 6.26915213 | 31.57012304 | 0.0228987  | ubiquitin specific peptidase 2 [Source:HGNC Symbol;Acc:12618]                                         |

|                 |                |              |            |            |             |            |                                                                                                                         |
|-----------------|----------------|--------------|------------|------------|-------------|------------|-------------------------------------------------------------------------------------------------------------------------|
| ENSG00000139629 | protein_coding | GALNT6       | -3.4467265 | 13.0292897 | 142.0655537 | 4.5602E-10 | UDP-N-acetyl-alpha-D-galactosamine:polypeptide N-acetylgalactosaminyltransferase 6 (GalNAc-T6) [Source:HGNC             |
| ENSG00000092929 | protein_coding | UNC13D       | 2.5183831  | 504.950372 | 88.13326016 | 0.00224518 | unc-13 homolog D (C. elegans) [Source:HGNC Symbol;Acc:23147]                                                            |
| ENSG00000107731 | protein_coding | UNC5B        | -3.7714969 | 1.44484947 | 19.7313269  | 0.00050146 | unc-5 homolog B (C. elegans) [Source:HGNC Symbol;Acc:12568]                                                             |
| ENSG00000253250 | protein_coding | RP11-122A3.2 | Inf        | 31.4890866 | 0           | 0.02168606 | uncharacterized protein LOC100127983 [Source:RefSeq peptide;Acc:NP_001177901]                                           |
| ENSG00000176515 | protein_coding | AL033381.1   | -2.5049748 | 3.4760318  | 19.7313269  | 0.04176263 | Uncharacterized protein; cDNA FLJ34594 fis, clone KIDNE2009109 [Source:UniProtKB/TrEMBL;Acc:Q8NAX6]                     |
| ENSG00000197813 | protein_coding | AC011450.1   | -3.4010691 | 1.61876781 | 17.10048332 | 0.00459656 | Uncharacterized protein; cDNA FLJ40032 fis, clone STOMA2009256 [Source:UniProtKB/TrEMBL;Acc:Q8N843]                     |
| ENSG00000065361 | protein_coding | ERBB3        | -2.7753383 | 4.41908949 | 30.25470125 | 0.00520944 | v-erb-b2 erythroblastic leukemia viral oncogene homolog 3 (avian) [Source:HGNC Symbol;Acc:3431]                         |
| ENSG00000150630 | protein_coding | VEGFC        | 2.5904136  | 110.913718 | 18.41590511 | 0.03051445 | vascular endothelial growth factor C [Source:HGNC Symbol;Acc:12682]                                                     |
| ENSG00000168140 | protein_coding | VASN         | 2.7374624  | 263.174971 | 39.4626538  | 0.00179898 | vasorin [Source:HGNC Symbol;Acc:18517]                                                                                  |
| ENSG00000206538 | protein_coding | VGLL3        | -2.1664799 | 217.123983 | 974.727549  | 3.1611E-08 | vestigial like 3 (Drosophila) [Source:HGNC Symbol;Acc:24327]                                                            |
| ENSG00000205221 | protein_coding | VIT          | -3.3658066 | 5.74207405 | 59.19398071 | 1.8682E-06 | vitrin [Source:HGNC Symbol;Acc:12697]                                                                                   |
| ENSG00000110002 | protein_coding | VWA5A        | -2.884171  | 30.1113165 | 222.3062831 | 8.1794E-09 | von Willebrand factor A domain containing 5A [Source:HGNC Symbol;Acc:6658]                                              |
| ENSG00000187667 | pseudogene     | WHAMMP3      | -3.0900238 | 1.6992914  | 14.46963973 | 0.01242598 | WAS protein homolog associated with actin, golgi membranes and microtubules pseudogene 3 [Source:HGNC Symbol;Acc:27892] |
| ENSG00000243710 | protein_coding | WDR65        | -3.2750029 | 1.63069288 | 15.78506152 | 0.01040909 | WD repeat domain 65 [Source:HGNC Symbol;Acc:26485]                                                                      |
| ENSG00000166415 | protein_coding | WDR72        | Inf        | 44.1132082 | 0           | 0.00373297 | WD repeat domain 72 [Source:HGNC Symbol;Acc:26790]                                                                      |
| ENSG00000103489 | protein_coding | XYLT1        | -3.3798478 | 1.13729195 | 11.83879614 | 0.00689948 | xylosyltransferase I [Source:HGNC Symbol;Acc:15516]                                                                     |
| ENSG00000199366 | misc_RNA       | Y_RNA        | -3.3560198 | 2.05552326 | 21.0467487  | 0.00263448 | Y RNA [Source:RFAM;Acc:RF00019]                                                                                         |
| ENSG00000207286 | misc_RNA       | Y_RNA        | -2.5934613 | 2.61539104 | 15.78506152 | 0.03399288 | Y RNA [Source:RFAM;Acc:RF00019]                                                                                         |
| ENSG00000137693 | protein_coding | YAP1         | -2.1505441 | 1149.22884 | 5102.521137 | 5.8531E-08 | Yes-associated protein 1 [Source:HGNC Symbol;Acc:16262]                                                                 |
| ENSG00000197020 | protein_coding | ZNF100       | 6.2714566  | 101.615879 | 1.315421793 | 1.7027E-05 | zinc finger protein 100 [Source:HGNC Symbol;Acc:12880]                                                                  |
| ENSG00000165512 | protein_coding | ZNF22        | Inf        | 39.9417848 | 0           | 0.00526264 | zinc finger protein 22 (KOX 15) [Source:HGNC Symbol;Acc:13012]                                                          |
| ENSG00000185947 | protein_coding | ZNF267       | 2.4926035  | 318.333174 | 56.56313712 | 0.00502019 | zinc finger protein 267 [Source:HGNC Symbol;Acc:13060]                                                                  |
| ENSG00000198538 | protein_coding | ZNF28        | 6.125591   | 91.8441872 | 1.315421793 | 5.2342E-05 | zinc finger protein 28 [Source:HGNC Symbol;Acc:13073]                                                                   |
| ENSG00000182986 | protein_coding | ZNF320       | 6.0482574  | 87.0506323 | 1.315421793 | 7.1904E-05 | zinc finger protein 320 [Source:HGNC Symbol;Acc:13842]                                                                  |
| ENSG00000138311 | protein_coding | ZNF365       | Inf        | 57.0843715 | 0           | 0.00063247 | zinc finger protein 365 [Source:HGNC Symbol;Acc:18194]                                                                  |

|                 |                      |              |            |            |             |            |                                                                                 |
|-----------------|----------------------|--------------|------------|------------|-------------|------------|---------------------------------------------------------------------------------|
| ENSG00000186918 | protein_coding       | ZNF395       | -2.9778845 | 18.7003833 | 147.3272409 | 1.0703E-07 | zinc finger protein 395 [Source:HGNC Symbol;Acc:18737]                          |
| ENSG00000204604 | protein_coding       | ZNF468       | 2.5738546  | 93.9839572 | 15.78506152 | 0.03996331 | zinc finger protein 468 [Source:HGNC Symbol;Acc:33105]                          |
| ENSG00000225614 | protein_coding       | ZNF469       | Inf        | 145.129866 | 0           | 5.5618E-08 | zinc finger protein 469 [Source:HGNC Symbol;Acc:23216]                          |
| ENSG00000173258 | protein_coding       | ZNF483       | Inf        | 28.6708268 | 0           | 0.04375892 | zinc finger protein 483 [Source:HGNC Symbol;Acc:23384]                          |
| ENSG00000198795 | protein_coding       | ZNF521       | -2.573041  | 14.5897027 | 86.81783837 | 0.00015914 | zinc finger protein 521 [Source:HGNC Symbol;Acc:24605]                          |
| ENSG00000203326 | protein_coding       | ZNF525       | Inf        | 60.0706817 | 0           | 0.00038033 | zinc finger protein 525 [Source:HGNC Symbol;Acc:29423]                          |
| ENSG00000245680 | protein_coding       | ZNF585B      | Inf        | 28.2617727 | 0           | 0.04066168 | zinc finger protein 585B [Source:HGNC Symbol;Acc:30948]                         |
| ENSG00000167562 | protein_coding       | ZNF701       | Inf        | 35.0810541 | 0           | 0.01495304 | zinc finger protein 701 [Source:HGNC Symbol;Acc:25597]                          |
| ENSG00000227124 | protein_coding       | ZNF717       | Inf        | 30.9839505 | 0           | 0.02979131 | zinc finger protein 717 [Source:HGNC Symbol;Acc:29448]                          |
| ENSG00000167766 | protein_coding       | ZNF83        | 3.3190206  | 78.7664096 | 7.892530761 | 0.01268897 | zinc finger protein 83 [Source:HGNC Symbol;Acc:13158]                           |
| ENSG00000235786 | sense_intronic       | ZNRF3-IT1    | -3.2208097 | 1.41092748 | 13.15421793 | 0.00939541 | ZNRF3 intronic transcript 1 (non-protein coding) [Source:HGNC Symbol;Acc:41440] |
| ENSG00000231419 | lincRNA              | AC004863.6   | -2.4033153 | 10.1948046 | 53.93229353 | 0.00566403 |                                                                                 |
| ENSG00000240350 | lincRNA              | AC017002.1   | -2.0649202 | 19.806268  | 82.87157299 | 0.00538379 |                                                                                 |
| ENSG00000181495 | protein_coding       | AC026703.1   | 4.7932712  | 583.584053 | 21.0467487  | 1.1395E-08 |                                                                                 |
| ENSG00000213963 | processed_transcript | AC074286.1   | -2.1318707 | 12.6054191 | 55.24771533 | 0.01495304 |                                                                                 |
| ENSG00000215196 | lincRNA              | AC091878.1   | -2.0506443 | 9.52534783 | 39.4626538  | 0.03767869 |                                                                                 |
| ENSG00000227189 | antisense            | AC092535.3   | Inf        | 41.1142541 | 0           | 0.00585057 |                                                                                 |
| ENSG00000253864 | lincRNA              | AC131025.8   | Inf        | 36.9839718 | 0           | 0.01191974 |                                                                                 |
| ENSG00000225746 | lincRNA              | AL132709.5   | Inf        | 40.9156751 | 0           | 0.00578886 |                                                                                 |
| ENSG00000225745 | processed_transcript | AL773572.7   | -2.6765595 | 34.1545378 | 218.3600177 | 1.4592E-07 |                                                                                 |
| ENSG00000255414 | lincRNA              | AP000783.2   | -3.0606016 | 24.7532264 | 206.5212216 | 2.5904E-09 |                                                                                 |
| ENSG00000249647 | processed_transcript | CTC-349C3.2  | -3.4649685 | 1.07213157 | 11.83879614 | 0.02361883 |                                                                                 |
| ENSG00000246082 | pseudogene           | NUDT16P      | Inf        | 28.8512698 | 0           | 0.04195639 |                                                                                 |
| ENSG00000229950 | antisense            | RP1-290I10.6 | -3.233076  | 4.33684467 | 40.7780756  | 0.00038452 |                                                                                 |
| ENSG00000258285 | lincRNA              | RP11-103B5.2 | -3.227635  | 1.54469515 | 14.46963973 | 0.02332455 |                                                                                 |



|                 |                      |               |            |            |             |            |
|-----------------|----------------------|---------------|------------|------------|-------------|------------|
| ENSG00000237248 | lincRNA              | RP11-118B22.2 | -2.8550738 | 2.90885561 | 21.0467487  | 0.03540604 |
| ENSG00000250208 | lincRNA              | RP11-143E21.7 | -2.7456797 | 16.6706303 | 111.8108524 | 1.1701E-05 |
| ENSG00000254290 | lincRNA              | RP11-150O12.3 | -4.1108783 | 0.60905618 | 10.52337435 | 0.00266616 |
| ENSG00000249306 | processed_transcript | RP11-267A15.1 | 4.3202308  | 105.110011 | 5.261687174 | 0.00031534 |
| ENSG00000254101 | lincRNA              | RP11-30J20.1  | -3.0035033 | 3.44460758 | 27.62385766 | 0.00212505 |
| ENSG00000229098 | antisense            | RP11-348G8.3  | -3.7740244 | 0.76923757 | 10.52337435 | 0.00420108 |
| ENSG00000256893 | antisense            | RP11-392P7.6  | -2.1969937 | 8.03270927 | 36.83181022 | 0.02979131 |
| ENSG00000233052 | sense_intronic       | RP11-398B16.2 | -4.1403669 | 0.59673348 | 10.52337435 | 0.00182518 |
| ENSG00000225778 | antisense            | RP11-401F24.4 | -2.923866  | 3.46675911 | 26.30843587 | 0.00465126 |
| ENSG00000227953 | processed_transcript | RP11-439E19.3 | -3.2774165 | 1.627967   | 15.78506152 | 0.00496803 |
| ENSG00000257496 | processed_transcript | RP11-474P2.4  | -2.1369987 | 5.98128262 | 26.30843587 | 0.03035427 |
| ENSG00000253972 | lincRNA              | RP11-4K16.2   | -3.5279109 | 1.48252285 | 17.10048332 | 0.00264283 |
| ENSG00000236163 | sense_intronic       | RP11-501I18.2 | -2.4818724 | 4.47404745 | 24.99301408 | 0.03941808 |
| ENSG00000214145 | lincRNA              | RP11-513G11.1 | -3.3822352 | 4.41548922 | 46.03976277 | 1.9045E-05 |
| ENSG00000237781 | antisense            | RP11-54A4.2   | -3.24326   | 2.22262647 | 21.0467487  | 0.00205161 |
| ENSG00000223617 | lincRNA              | RP11-54H7.2   | -3.3391636 | 1.2998003  | 13.15421793 | 0.01258814 |
| ENSG00000254945 | pseudogene           | RP11-556O5.3  | -2.6562657 | 3.96463302 | 24.99301408 | 0.0148241  |
| ENSG00000254967 | processed_transcript | RP11-680F20.6 | -3.5942094 | 0.98026323 | 11.83879614 | 0.00507267 |
| ENSG00000249395 | lincRNA              | RP11-697M17.1 | -3.8888281 | 2.48638948 | 36.83181022 | 2.6433E-06 |
| ENSG00000244128 | lincRNA              | RP11-85M11.2  | -5.0472575 | 0.59673348 | 19.7313269  | 4.053E-06  |
| ENSG00000247287 | lincRNA              | RP11-902B17.1 | -2.7765623 | 6.71899831 | 46.03976277 | 0.00198502 |
| ENSG00000232803 | antisense            | RP11-93B14.5  | -2.5841851 | 6.14194385 | 36.83181022 | 0.00566403 |
| ENSG00000255367 | processed_transcript | RP13-726E6.2  | -3.462295  | 2.38693391 | 26.30843587 | 0.00016077 |
| ENSG00000254872 | lincRNA              | RP13-870H17.3 | -3.6070672 | 1.94313113 | 23.67759228 | 0.00056231 |
| ENSG00000257531 | pseudogene           | RP3-405J10.2  | -2.8219895 | 10.9752284 | 77.60988581 | 0.00019289 |

|                 |           |               |            |            |             |            |
|-----------------|-----------|---------------|------------|------------|-------------|------------|
| ENSG00000213742 | antisense | RP4-694B14.5  | -2.0476547 | 10.8177878 | 44.72434098 | 0.04106965 |
| ENSG00000227964 | lincRNA   | RP5-1112F19.2 | -4.3435622 | 1.16625909 | 23.67759228 | 1.1896E-05 |

(b)

| Gene ID         | Feature        | Gene Symbol | Log Fold Change | Read Count (1hpi) | Read Count (1 hpi mock) | FDR        | Gene Description                                                                                                                                 |
|-----------------|----------------|-------------|-----------------|-------------------|-------------------------|------------|--------------------------------------------------------------------------------------------------------------------------------------------------|
| ENSG00000131016 | protein_coding | AKAP12      | 4.8899928       | 173.5199          | 5.852140868             | 0.00065963 | A kinase (PRKA) anchor protein 12 [Source:HGNC Symbol;Acc:370]                                                                                   |
| ENSG00000135074 | protein_coding | ADAM19      | 5.5291203       | 62.3625309        | 1.350494046             | 0.0028429  | ADAM metalloproteinase domain 19 [Source:HGNC Symbol;Acc:197]                                                                                    |
| ENSG00000156140 | protein_coding | ADAMTS3     | Inf             | 16.0121471        | 0                       | 0.0472617  | ADAM metalloproteinase with thrombospondin type 1 motif, 3 [Source:HGNC Symbol;Acc:219]                                                          |
| ENSG00000049192 | protein_coding | ADAMTS6     | 5.2400386       | 153.11676         | 4.051482139             | 0.00025194 | ADAM metalloproteinase with thrombospondin type 1 motif, 6 [Source:HGNC Symbol;Acc:222]                                                          |
| ENSG00000150594 | protein_coding | ADRA2A      | Inf             | 24.2220286        | 0                       | 0.0186754  | adrenoceptor alpha 2A [Source:HGNC Symbol;Acc:281]                                                                                               |
| ENSG00000166825 | protein_coding | ANPEP       | Inf             | 25.6382893        | 0                       | 0.01213716 | alanyl (membrane) aminopeptidase [Source:HGNC Symbol;Acc:500]                                                                                    |
| ENSG00000151632 | protein_coding | AKR1C2      | 3.712248        | 82.6033114        | 6.30230555              | 0.01349981 | aldo-keto reductase family 1, member C2 (dihydrodiol dehydrogenase 2; bile acid binding protein; 3-alpha hydroxysteroid dehydrogenase, type III) |
| ENSG00000163283 | protein_coding | ALPP        | -3.6776184      | 34.3006692        | 438.9105651             | 6.5443E-05 | alkaline phosphatase, placental [Source:HGNC Symbol;Acc:439]                                                                                     |
| ENSG00000163286 | protein_coding | ALPPL2      | -4.0096199      | 1.90048507        | 30.61119839             | 0.02347392 | alkaline phosphatase, placental-like 2 [Source:HGNC Symbol;Acc:441]                                                                              |
| ENSG00000184867 | protein_coding | ARMCX2      | 7.8506464       | 103.908591        | 0.450164682             | 3.4714E-06 | armadillo repeat containing, X-linked 2 [Source:HGNC Symbol;Acc:16869]                                                                           |
| ENSG00000165029 | protein_coding | ABCA1       | 5.364166        | 55.6246816        | 1.350494046             | 0.00407039 | ATP-binding cassette, sub-family A (ABC1), member 1 [Source:HGNC Symbol;Acc:29]                                                                  |
| ENSG00000023839 | protein_coding | ABCC2       | -2.9902299      | 44.6991759        | 355.1799342             | 0.03356533 | ATP-binding cassette, sub-family C (CFTR/MRP), member 2 [Source:HGNC Symbol;Acc:53]                                                              |
| ENSG00000143515 | protein_coding | ATP8B2      | 3.5263869       | 98.5537703        | 8.553128961             | 0.04661868 | ATPase, aminophospholipid transporter, class I, type 8B, member 2 [Source:HGNC Symbol;Acc:13534]                                                 |
| ENSG00000169255 | protein_coding | B3GALNT1    | Inf             | 27.2471832        | 0                       | 0.00649981 | beta-1,3-N-acetylgalactosaminyltransferase 1 (globoside blood group) [Source:HGNC Symbol;Acc:918]                                                |
| ENSG00000153956 | protein_coding | CACNA2D1    | 6.9106732       | 162.484749        | 1.350494046             | 6.5291E-06 | calcium channel, voltage-dependent, alpha 2/delta subunit 1 [Source:HGNC Symbol;Acc:1399]                                                        |
| ENSG00000153132 | protein_coding | CLGN        | 4.1231923       | 39.2234676        | 2.250823411             | 0.02790062 | calmegin [Source:HGNC Symbol;Acc:2060]                                                                                                           |
| ENSG00000117519 | protein_coding | CNN3        | 4.2858651       | 87.810284         | 4.501646822             | 0.00407039 | calponin 3, acidic [Source:HGNC Symbol;Acc:2157]                                                                                                 |
| ENSG00000074410 | protein_coding | CA12        | 4.0821136       | 99.1181992        | 5.852140868             | 0.0074028  | carbonic anhydrase XII [Source:HGNC Symbol;Acc:1371]                                                                                             |
| ENSG00000198108 | protein_coding | CHSY3       | 6.4816969       | 40.2306083        | 0.450164682             | 0.00404145 | chondroitin sulfate synthase 3 [Source:HGNC Symbol;Acc:24293]                                                                                    |

|                 |                |               |           |            |             |            |                                                                                           |
|-----------------|----------------|---------------|-----------|------------|-------------|------------|-------------------------------------------------------------------------------------------|
| ENSG00000168675 | protein_coding | C18orf1       | 5.6709245 | 68.8035821 | 1.350494046 | 0.00152876 | chromosome 18 open reading frame 1 [Source:HGNC Symbol;Acc:1224]                          |
| ENSG00000176907 | protein_coding | C8orf4        | 3.9035398 | 107.788884 | 7.202634914 | 0.00698707 | chromosome 8 open reading frame 4 [Source:HGNC Symbol;Acc:1357]                           |
| ENSG00000188517 | protein_coding | COL25A1       | Inf       | 61.9750734 | 0           | 3.7362E-05 | collagen, type XXV, alpha 1 [Source:HGNC Symbol;Acc:18603]                                |
| ENSG00000121005 | protein_coding | CRISPLD1      | Inf       | 16.2605666 | 0           | 0.03328614 | cysteine-rich secretory protein LCCL domain containing 1 [Source:HGNC Symbol;Acc:18206]   |
| ENSG00000006016 | protein_coding | CRLF1         | 5.9095126 | 81.1770411 | 1.350494046 | 0.00017159 | cytokine receptor-like factor 1 [Source:HGNC Symbol;Acc:2364]                             |
| ENSG00000147202 | protein_coding | DIAPH2        | Inf       | 63.5376506 | 0           | 1.6604E-05 | diaphanous homolog 2 (Drosophila) [Source:HGNC Symbol;Acc:2877]                           |
| ENSG00000113657 | protein_coding | DPYSL3        | 3.9173437 | 115.626745 | 7.652799597 | 0.01553256 | dihydropyrimidinase-like 3 [Source:HGNC Symbol;Acc:3015]                                  |
| ENSG00000133083 | protein_coding | DCLK1         | Inf       | 24.7361752 | 0           | 0.0072682  | doublecortin-like kinase 1 [Source:HGNC Symbol;Acc:2700]                                  |
| ENSG00000164330 | protein_coding | EBF1          | Inf       | 25.2596318 | 0           | 0.00622024 | early B-cell factor 1 [Source:HGNC Symbol;Acc:3126]                                       |
| ENSG00000170571 | protein_coding | EMB           | 3.9512468 | 55.7064169 | 3.601317457 | 0.0275176  | embigin [Source:HGNC Symbol;Acc:30465]                                                    |
| ENSG00000149218 | protein_coding | ENDOD1        | 6.1563019 | 32.1072384 | 0.450164682 | 0.00698707 | endonuclease domain containing 1 [Source:HGNC Symbol;Acc:29129]                           |
| ENSG00000145242 | protein_coding | EPHA5         | 6.0410659 | 29.6424062 | 0.450164682 | 0.01973934 | EPH receptor A5 [Source:HGNC Symbol;Acc:3389]                                             |
| ENSG00000156804 | protein_coding | FBXO32        | 4.9939238 | 100.413089 | 3.151152775 | 0.00131259 | F-box protein 32 [Source:HGNC Symbol;Acc:16731]                                           |
| ENSG00000144369 | protein_coding | FAM171B       | 3.7132626 | 59.0438721 | 4.501646822 | 0.04207142 | family with sequence similarity 171, member B [Source:HGNC Symbol;Acc:29412]              |
| ENSG00000188738 | protein_coding | FSIP2         | 3.8977668 | 80.5188202 | 5.401976186 | 0.0169419  | fibrous sheath interacting protein 2 [Source:HGNC Symbol;Acc:21675]                       |
| ENSG00000110195 | protein_coding | FOLR1         | 9.7460157 | 386.557839 | 0.450164682 | 9.9649E-08 | folate receptor 1 (adult) [Source:HGNC Symbol;Acc:3791]                                   |
| ENSG00000248905 | protein_coding | FMN1          | 6.4483604 | 39.3116549 | 0.450164682 | 0.00500445 | formin 1 [Source:HGNC Symbol;Acc:3768]                                                    |
| ENSG00000152661 | protein_coding | GJA1          | 6.7101871 | 47.1345122 | 0.450164682 | 0.00132077 | gap junction protein, alpha 1, 43kDa [Source:HGNC Symbol;Acc:4274]                        |
| ENSG00000139278 | protein_coding | GLIPR1        | 4.8586398 | 117.546645 | 4.051482139 | 0.00040848 | GLI pathogenesis-related 1 [Source:HGNC Symbol;Acc:17001]                                 |
| ENSG00000166923 | protein_coding | GREM1         | 7.0804709 | 121.852809 | 0.900329364 | 8.2707E-06 | gremlin 1 [Source:HGNC Symbol;Acc:2001]                                                   |
| ENSG00000117228 | protein_coding | GBP1          | Inf       | 61.9473693 | 0           | 1.5487E-05 | guanylate binding protein 1, interferon-inducible [Source:HGNC Symbol;Acc:4182]           |
| ENSG00000162645 | protein_coding | GBP2          | 5.2783727 | 34.9421746 | 0.900329364 | 0.00925182 | guanylate binding protein 2, interferon-inducible [Source:HGNC Symbol;Acc:4183]           |
| ENSG00000143341 | protein_coding | HMCN1         | 4.2763476 | 43.6164519 | 2.250823411 | 0.04323898 | hemicentin 1 [Source:HGNC Symbol;Acc:19194]                                               |
| ENSG00000166503 | protein_coding | RP11-382A20.3 | 4.089296  | 38.3126494 | 2.250823411 | 0.0353038  | Hepatoma-derived growth factor-related protein 3 [Source:UniProtKB/Swiss-Prot;Acc:Q9Y3E1] |
| ENSG00000143452 | protein_coding | HORMAD1       | Inf       | 17.1377238 | 0           | 0.03533073 | HORMA domain containing 1 [Source:HGNC Symbol;Acc:25245]                                  |

|                 |                |           |            |            |             |            |                                                                                                                        |
|-----------------|----------------|-----------|------------|------------|-------------|------------|------------------------------------------------------------------------------------------------------------------------|
| ENSG00000152580 | protein_coding | IGSF10    | 7.3334553  | 217.812443 | 1.350494046 | 3.6521E-06 | immunoglobulin superfamily, member 10 [Source:HGNC Symbol;Acc:26384]                                                   |
| ENSG00000137809 | protein_coding | ITGA11    | Inf        | 163.530188 | 0           | 3.9365E-07 | integrin, alpha 11 [Source:HGNC Symbol;Acc:6136]                                                                       |
| ENSG00000115232 | protein_coding | ITGA4     | Inf        | 17.5643042 | 0           | 0.04433547 | integrin, alpha 4 (antigen CD49D, alpha 4 subunit of VLA-4 receptor) [Source:HGNC Symbol;Acc:6140]                     |
| ENSG00000169429 | protein_coding | IL8       | 3.679814   | 40.38349   | 3.151152775 | 0.02768494 | interleukin 8 [Source:HGNC Symbol;Acc:6025]                                                                            |
| ENSG00000112769 | protein_coding | LAMA4     | 7.716541   | 378.740477 | 1.800658729 | 1.257E-06  | laminin, alpha 4 [Source:HGNC Symbol;Acc:6484]                                                                         |
| ENSG00000049323 | protein_coding | LTBP1     | 3.9995264  | 64.8024374 | 4.051482139 | 0.02933329 | latent transforming growth factor beta binding protein 1 [Source:HGNC Symbol;Acc:6714]                                 |
| ENSG00000147676 | lincRNA        | MAL2      | -3.2266602 | 18.5144428 | 173.3134026 | 0.00483944 | mal, T-cell differentiation protein 2 (gene/pseudogene) [Source:HGNC Symbol;Acc:13634]                                 |
| ENSG00000214548 | lincRNA        | MEG3      | Inf        | 30.237962  | 0           | 0.00511047 | maternally expressed 3 (non-protein coding) [Source:HGNC Symbol;Acc:14575]                                             |
| ENSG00000087245 | protein_coding | MMP2      | 5.5240341  | 41.4287072 | 0.900329364 | 0.00990079 | matrix metalloproteinase 2 (gelatinase A, 72kDa gelatinase, 72kDa type IV collagenase) [Source:HGNC Symbol;Acc:7166]   |
| ENSG00000117122 | protein_coding | MFAP2     | Inf        | 18.9118879 | 0           | 0.03336016 | microfibrillar-associated protein 2 [Source:HGNC Symbol;Acc:7033]                                                      |
| ENSG00000131711 | protein_coding | MAP1B     | 7.3638452  | 296.599011 | 1.800658729 | 3.1945E-06 | microtubule-associated protein 1B [Source:HGNC Symbol;Acc:6836]                                                        |
| ENSG00000181143 | protein_coding | MUC16     | 5.2413022  | 221.362445 | 5.852140868 | 0.00070119 | mucin 16, cell surface associated [Source:HGNC Symbol;Acc:15582]                                                       |
| ENSG00000141052 | protein_coding | MYOCD     | Inf        | 73.7488934 | 0           | 1.6604E-05 | myocardin [Source:HGNC Symbol;Acc:16067]                                                                               |
| ENSG00000113389 | protein_coding | NPR3      | 4.8985884  | 161.129367 | 5.401976186 | 0.00070119 | natriuretic peptide receptor C/guanylate cyclase C (atrionatriuretic peptide receptor C) [Source:HGNC Symbol;Acc:7945] |
| ENSG00000252331 | NOT FOUND      | NOT FOUND | Inf        | 45.4607286 | 0           | 0.0072682  | NOT FOUND                                                                                                              |
| ENSG00000074181 | protein_coding | NOTCH3    | 5.9130059  | 108.498455 | 1.800658729 | 0.00023482 | notch 3 [Source:HGNC Symbol;Acc:7883]                                                                                  |
| ENSG00000100968 | protein_coding | NFATC4    | Inf        | 45.9632973 | 0           | 0.0002467  | nuclear factor of activated T-cells, cytoplasmic, calcineurin-dependent 4 [Source:HGNC Symbol;Acc:7778]                |
| ENSG00000139946 | protein_coding | PELI2     | 5.7386652  | 48.0741681 | 0.900329364 | 0.00394207 | pellino E3 ubiquitin protein ligase family member 2 [Source:HGNC Symbol;Acc:8828]                                      |
| ENSG00000186642 | protein_coding | PDE2A     | 10.514973  | 658.708924 | 0.450164682 | 3.0761E-07 | phosphodiesterase 2A, cGMP-stimulated [Source:HGNC Symbol;Acc:8777]                                                    |
| ENSG00000154864 | protein_coding | PIEZO2    | Inf        | 120.920845 | 0           | 5.9836E-07 | piezo-type mechanosensitive ion channel component 2 [Source:HGNC Symbol;Acc:26270]                                     |
| ENSG00000156011 | protein_coding | PSD3      | 4.1468066  | 119.612303 | 6.752470232 | 0.00698707 | pleckstrin and Sec7 domain containing 3 [Source:HGNC Symbol;Acc:19093]                                                 |
| ENSG00000120594 | protein_coding | PLXDC2    | 4.263195   | 51.8647442 | 2.700988093 | 0.01718206 | plexin domain containing 2 [Source:HGNC Symbol;Acc:21013]                                                              |
| ENSG00000126838 | protein_coding | PZP       | -3.6462224 | 6.83128956 | 85.53128961 | 0.00257955 | pregnancy-zone protein [Source:HGNC Symbol;Acc:9750]                                                                   |
| ENSG00000106772 | protein_coding | PRUNE2    | 9.990984   | 458.096822 | 0.450164682 | 2.636E-07  | prune homolog 2 (Drosophila) [Source:HGNC Symbol;Acc:25209]                                                            |
| ENSG00000250305 | protein_coding | KIAA1456  | -5.1624714 | 0.35194168 | 12.6046111  | 0.01875889 | Putative methyltransferase KIAA1456 [Source:UniProtKB/Swiss-Prot;Acc:Q9P272]                                           |

|                 |                |            |            |            |             |            |                                                                                                     |
|-----------------|----------------|------------|------------|------------|-------------|------------|-----------------------------------------------------------------------------------------------------|
| ENSG00000004799 | protein_coding | PK4        | 4.3533989  | 478.496113 | 23.40856347 | 0.00649981 | pyruvate dehydrogenase kinase, isozyme 4 [Source:HGNC Symbol;Acc:8812]                              |
| ENSG00000165105 | protein_coding | RASEF      | Inf        | 19.9417574 | 0           | 0.02727153 | RAS and EF-hand domain containing [Source:HGNC Symbol;Acc:26464]                                    |
| ENSG00000071242 | protein_coding | RPS6KA2    | Inf        | 54.1433961 | 0           | 0.00013733 | ribosomal protein S6 kinase, 90kDa, polypeptide 2 [Source:HGNC Symbol;Acc:10431]                    |
| ENSG00000178222 | protein_coding | RNF212     | Inf        | 36.3920398 | 0           | 0.00130864 | ring finger protein 212 [Source:HGNC Symbol;Acc:27729]                                              |
| ENSG00000006747 | protein_coding | SCIN       | -3.5851859 | 4.12587062 | 49.51811504 | 0.02962233 | scinderin [Source:HGNC Symbol;Acc:21695]                                                            |
| ENSG00000178172 | protein_coding | SPINK6     | 3.7481695  | 429.478283 | 31.96169243 | 0.0134844  | serine peptidase inhibitor, Kazal type 6 [Source:HGNC Symbol;Acc:29486]                             |
| ENSG00000130413 | protein_coding | STK33      | Inf        | 18.8605924 | 0           | 0.04207142 | serine/threonine kinase 33 [Source:HGNC Symbol;Acc:14568]                                           |
| ENSG00000149212 | protein_coding | SESN3      | Inf        | 152.290166 | 0           | 2.636E-07  | sestrin 3 [Source:HGNC Symbol;Acc:23060]                                                            |
| ENSG00000179542 | protein_coding | SLITRK4    | 6.3607582  | 36.9956299 | 0.450164682 | 0.00347259 | SLIT and NTRK-like family, member 4 [Source:HGNC Symbol;Acc:23502]                                  |
| ENSG00000070915 | protein_coding | SLC12A3    | -3.4106512 | 12.1067938 | 128.7470991 | 0.00939689 | solute carrier family 12 (sodium/chloride transporters), member 3 [Source:HGNC Symbol;Acc:10912]    |
| ENSG00000146411 | protein_coding | SLC2A12    | 4.5654977  | 42.6366574 | 1.800658729 | 0.022715   | solute carrier family 2 (facilitated glucose transporter), member 12 [Source:HGNC Symbol;Acc:18067] |
| ENSG00000137642 | protein_coding | SORL1      | 4.8898683  | 93.425727  | 3.151152775 | 0.00257955 | sortilin-related receptor, L(DLR class) A repeats containing [Source:HGNC Symbol;Acc:11185]         |
| ENSG00000134668 | protein_coding | SPOCD1     | 5.376056   | 37.3900045 | 0.900329364 | 0.01553256 | SPOC domain containing 1 [Source:HGNC Symbol;Acc:26338]                                             |
| ENSG00000156414 | protein_coding | TDRD9      | 6.4929255  | 40.5449479 | 0.450164682 | 0.00257955 | tudor domain containing 9 [Source:HGNC Symbol;Acc:20122]                                            |
| ENSG00000164761 | protein_coding | TNFRSF11B  | Inf        | 16.50604   | 0           | 0.04207142 | tumor necrosis factor receptor superfamily, member 11b [Source:HGNC Symbol;Acc:11909]               |
| ENSG00000104723 | protein_coding | TUSC3      | 6.2499493  | 102.781488 | 1.350494046 | 1.6604E-05 | tumor suppressor candidate 3 [Source:HGNC Symbol;Acc:30242]                                         |
| ENSG00000182986 | protein_coding | ZNF320     | 6.0345804  | 29.5094506 | 0.450164682 | 0.01389319 | zinc finger protein 320 [Source:HGNC Symbol;Acc:13842]                                              |
| ENSG00000181495 | protein_coding | AC026703.1 | 5.8143527  | 126.658984 | 2.250823411 | 4.4366E-05 |                                                                                                     |
