# Supplementary material for: Simultaneous Transcriptional Profiling of Bacteria and Their Host Cells
Source: PubMed Central journal article supplement (PMC3851178; doi:10.1371/journal.pone.0080597), 2013-12-04
Supplement: pone.0080597.s010.pdf [file pone.0080597.s010.pdf]

**Table S6.** (a) Custom Taqman primers and probes used for *Chlamydia* qRT-PCR assays. (b) Predesigned Taqman primer and probe sets used for human qRT-PCR assays.

| (a) | Assay Target | Forward Primer Sequence (5'-3') | Reverse Primer Sequence (5'-3') | Probe Sequence (5'-3')        |
|-----|--------------|---------------------------------|---------------------------------|-------------------------------|
|     | 16S          | GTAGCGGTGAAATGCGTAGATATGT       | GCGCCTTAGCGTCAGGTATAAATTA       | FAM - CCACTGGTGTCTCTCC - NFQ  |
|     | CT001        | CCATGTGGACACAAGCAGCTTAT         | ACTTCAAGAAGTTTAGGCAGACCAT       | FAM - CCCAGCGATTCCCCT - NFQ   |
|     | CT018        | CCTCTGTCAAATGACCCGAACATT        | GCACTTGTGGCCATTCTTTCTAAT        | FAM - CCTTGCATAAGTTCC - NFQ   |
|     | CT038        | CCCATTTAAAAGAAGCTCTCGAGAAAC     | CTTTCGGATCATCCAGAAGCTA          | FAM - ATGGGTGCTCAACTCT - NFQ  |
|     | CT080        | AGTTCGATGTGCTAGTACATTCGTT       | CACAAAGCCATTCTGGTACGTAAAA       | FAM - CACGTTCCCTAAAATT - NFQ  |
|     | CT081        | GGGCTACAGAGATGCACTTTATTG        | CTCTGGGCCTTGCGAAAAA             | FAM - CCGCTTTTCTTTCC - NFQ    |
|     | CT088        | AGGATGGTAATTCAGGATTTTTAGTTGCT   | AGCAGCTTTGAAAAATTTTTGTCTAAAGGT  | FAM - ATGCTTGAAAAACTT - NFQ   |
|     | CT214        | GCAGCTCCCTTTCTATCTTTGATTGA      | GAAAGAAGGGAAGCCTTAAAGCTA        | FAM - TACTCACAAAATCCC - NFQ   |
|     | CT216        | CCAATTTGGCTTCGGATATGGAA         | GGCAAGAGTGGATACAGCTCCTA         | FAM - CCCAAAGCCGTTTCA - NFQ   |
|     | CT229        | AGGACTTTTAGTTGCTACTGCGG         | GGAAACCAACCATAACTAAGATCATACCA   | FAM - CTAAGTGTGCAATCAC - NFQ  |
|     | CT391        | GTAACCAACAACCGGAATTCGT          | CGCGCGGAGTTTATTTGTAATTTCT       | FAM - AACCCCAACGACCTT - NFQ   |
|     | CT398.1      | ATCTCCTCCGTATTCAGACAATCCT       | GGTGTGTCTGTGTAGTAAATGAGCTT      | FAM - CCATCTGTGAATATCC - NFQ  |
|     | CT416        | TGCAGCATTTCCTATCACTGTAAGG       | AGCAGCTTCATGATCTTCTGTGTGA       | FAM - CAGTGTGCGCAACCTT - NFQ  |
|     | CT444        | TGCAACTCTGTAAACGGGTATGTC        | GTTTAGCATCTTGGTGCATATCC         | FAM - CCAGCTTGCAAACCT - NFQ   |
|     | CT446        | GGAGAGCTTCTGTTGATAACGAGA        | GCGTGTAGCATAGTAAATCTTCTGTTCA    | FAM - ATGGACGCCACTTGTC - NFQ  |
|     | CT480.1      | CTTTTACTCGCAATGTTAACTTCTGCT     | TTTTTCTTCTTCACTCATCAGCGTAA      | FAM - CCGCTGTGGTTCCGT - NFQ   |
|     | CT500        | TCTCTGGTCTGTTGTAGTAATGGT        | GCTCCCATCAACTCTCTGTTACG         | FAM - TCGACAGCGTTTTCC - NFQ   |
|     | CT565        | TGGTGTCTTTGATTGTTTTGGGATT       | TCCCGGAGCAACAAAATAACC           | FAM - CTCGGACCCAAGACAC - NFQ  |
|     | CT576        | CCAAGGGAATATCAGGAAGCTATCG       | TGATAGCAAGAGCTAAGACCTAAGATGT    | FAM - CAGCCTCCAAACCTCA - NFQ  |
|     | CT577        | ACTCAGCGGAATGTTAGACTCTCT        | GGCTTCCTCTTTAGGATTGTCAAAC       | FAM - TCCTGTGCAAACCTTG - NFQ  |
|     | CT579        | GGTCTCTGTAGGAGGAGGATTTTA        | GCGCTTGCAAGTTTCATTAGTGA         | FAM - CCTCCAAACTCTTCG - NFQ   |
|     | CT659        | GATAAGCCAGAGGAAGTGCATCT         | CTCCCTTAGCAACAGTCAATTCGTA       | FAM - TCCCTGCACCTCTTTC - NFQ  |
|     | CT660        | TCCTTCCACAACACAGAGACTCT         | GGTCCGTAGAGAAATCTTGAATCGA       | FAM - TTTTGCTGCGTTTTTCG - NFQ |
|     | CT665        | GCCCACGAAGTAAATGCTAATGTAC       | ACTCTTTAGAAGCCCTTCTCGAA         | FAM - ACGCTGACATCTTCTC - NFQ  |
|     | CT734        | CAGATCCAATGACAGATTCCGAAAGA      | TGAGCCATAGCCAAAGCAATAGAA        | FAM - CTGCTGCTGATAAGTC - NFQ  |
|     | CT798        | TCTCCGCGGATTTTAAATGGAA          | TCGCTAAATGGGATCCGTTTCA          | FAM - TCGACACGACAATTTG - NFQ  |
|     | CT814        | CCCTAAAAGTGGGATGCAAATCAGA       | GGCTCGGCCTTTCTTCGT              | FAM - CTCGCGCTCAAGACAT - NFQ  |
|     | CT814.1      | TGAAACTTGTGCTGCAATTTCTTCTCT     | GCATACTTCTTGGTAAACCAATTTAGAAT   | FAM - CTCGCTGGCTTGCACC - NFQ  |
|     | CT834        | CGCGTTTCAAATGACTGGTTCTG         | GCGTTTCTGTTGCGAAGATCTTTT        | FAM - TTCCCGGACGAGTTC - NFQ   |
|     | CT864        | GCGTTACTGGTAAAGGAAGAAAGAC       | GCGTCAATAGCTTGTGTTGGCTTT        | FAM - CTCGTGCCATCAGCA - NFQ   |
|     | CT875        | ACCCCAACGAGTGGAGAGA             | CCTCTTTGGAAACGACTGAACAC         | FAM - TCCACGGAAGCTCT - NFQ    |

| (b) | Gene Symbol | ENSEMBL ID      | Assay ID   |
|-----|-------------|-----------------|------------|
|     | BIRC3       | ENSG0000023445  | Hs00985031 |
|     | CCL20       | ENSG00000115009 | Hs01011368 |
|     | CXCL3       | ENSG00000163734 | Hs00171061 |
|     | ELF3        | ENSG00000163435 | Hs00963881 |
|     | ERRF1       | ENSG00000116285 | Hs00219060 |
|     | ETS1        | ENSG00000134954 | Hs00428293 |
|     | GREM1       | ENSG00000166923 | Hs01879841 |
|     | IL1A        | ENSG00000115008 | Hs00174092 |

|          |                 |            |
|----------|-----------------|------------|
| IL8      | ENSG00000169429 | Hs00174103 |
| LAMB3    | ENSG00000196878 | Hs00165078 |
| SERPINE1 | ENSG00000106366 | Hs01126606 |
| TNC      | ENSG00000041982 | Hs01115665 |
| TNNC1    | ENSG00000114854 | Hs00896999 |
| TRPV3    | ENSG00000167723 | Hs00376854 |

---
